# Supplementary material for: Association between physical activity over a 10-year period and current insomnia symptoms, sleep duration and daytime sleepiness: a European population-based study
Source: PubMed Central journal article supplement — BMJ Open. 2024 Mar 26;14(3):e067197. doi: 10.1136/bmjopen-2022-067197 (PMC10966784; doi:10.1136/bmjopen-2022-067197), 2024-03-26
Supplement: bmjopen-2022-067197.draft_revisions.pdf [file bmjopen-2022-067197.draft_revisions.pdf]

# BMJ Open

BMJ Open is committed to open peer review. As part of this commitment we make the peer review history of every article we publish publicly available.

When an article is published we post the peer reviewers' comments and the authors' responses online. We also post the versions of the paper that were used during peer review. These are the versions that the peer review comments apply to.

The versions of the paper that follow are the versions that were submitted during the peer review process. They are not the versions of record or the final published versions. They should not be cited or distributed as the published version of this manuscript.

BMJ Open is an open access journal and the full, final, typeset and author-corrected version of record of the manuscript is available on our site with no access controls, subscription charges or pay-per-view fees (<http://bmjopen.bmj.com>).

If you have any questions on BMJ Open's open peer review process please email [info.bmjopen@bmj.com](mailto:info.bmjopen@bmj.com)

# BMJ Open

## The longitudinal association of physical activity with symptoms of insomnia, sleep duration and daytime sleepiness - A European population-based study

|                               |                                                                                                                                                                                                                                                                                                                                                                                                                                                                                                                                                                                                                                                                                                                                                                                                                                                                                                                                                                                                                                                                                                                                                                                                                                                                                                                                                                                                                                                                                                                                                                                                                                                                                                                                                                                                                                                                                                                                                                                                                                                                                                                                         |
|-------------------------------|-----------------------------------------------------------------------------------------------------------------------------------------------------------------------------------------------------------------------------------------------------------------------------------------------------------------------------------------------------------------------------------------------------------------------------------------------------------------------------------------------------------------------------------------------------------------------------------------------------------------------------------------------------------------------------------------------------------------------------------------------------------------------------------------------------------------------------------------------------------------------------------------------------------------------------------------------------------------------------------------------------------------------------------------------------------------------------------------------------------------------------------------------------------------------------------------------------------------------------------------------------------------------------------------------------------------------------------------------------------------------------------------------------------------------------------------------------------------------------------------------------------------------------------------------------------------------------------------------------------------------------------------------------------------------------------------------------------------------------------------------------------------------------------------------------------------------------------------------------------------------------------------------------------------------------------------------------------------------------------------------------------------------------------------------------------------------------------------------------------------------------------------|
| Journal:                      | <i>BMJ Open</i>                                                                                                                                                                                                                                                                                                                                                                                                                                                                                                                                                                                                                                                                                                                                                                                                                                                                                                                                                                                                                                                                                                                                                                                                                                                                                                                                                                                                                                                                                                                                                                                                                                                                                                                                                                                                                                                                                                                                                                                                                                                                                                                         |
| Manuscript ID                 | bmjopen-2022-067197                                                                                                                                                                                                                                                                                                                                                                                                                                                                                                                                                                                                                                                                                                                                                                                                                                                                                                                                                                                                                                                                                                                                                                                                                                                                                                                                                                                                                                                                                                                                                                                                                                                                                                                                                                                                                                                                                                                                                                                                                                                                                                                     |
| Article Type:                 | Original research                                                                                                                                                                                                                                                                                                                                                                                                                                                                                                                                                                                                                                                                                                                                                                                                                                                                                                                                                                                                                                                                                                                                                                                                                                                                                                                                                                                                                                                                                                                                                                                                                                                                                                                                                                                                                                                                                                                                                                                                                                                                                                                       |
| Date Submitted by the Author: | 11-Oct-2022                                                                                                                                                                                                                                                                                                                                                                                                                                                                                                                                                                                                                                                                                                                                                                                                                                                                                                                                                                                                                                                                                                                                                                                                                                                                                                                                                                                                                                                                                                                                                                                                                                                                                                                                                                                                                                                                                                                                                                                                                                                                                                                             |
| Complete List of Authors:     | <p>Bjornsdottir, Erla; Reykjavik University<br/>         Thorarinsdottir, Elin; Heilsugasla hofuoborgarsvaoisins; University of Iceland, Faculty of medicine<br/>         Lindberg, Eva ; Uppsala University, Department of Medical Sciences: Respiratory, Allergy and Sleep Research<br/>         Benediktsdottir, Bryndis; University of Iceland, Faculty of Medicine; Landspítali háskólasjúkrahús, Department of Sleep<br/>         Franklin, Karl; Umea Universitet, Department of Surgical and Perioperative Sciences<br/>         Jarvis, Debbie; Imperial College London School of Public Health, Population Health and Occupational Disease, National Heart and Lung Institute; Imperial College London, MRC-PHE Centre for Environment and Health<br/>         Demoly, Pascal ; University Hospital of Montpellier, France and Sorbonne Universités, University of Montpellier - Inserm UMR UA11<br/>         Perret, Jennifer; The University of Melbourne Melbourne Medical School<br/>         Garcia Aymerich, Judith; ISGlobal, Centre for Research in Environmental Epidemiology (CREAL); Universitat Pompeu Fabra<br/>         Dorado-Arenas, Sandra; Hospital Galdakao-Usansolo, Pulmonology Department<br/>         Heinrich, Joachim; Ludwig Maximilians University Munich, Institute and Clinic for Occupational, Social and Environmental Medicine; The University of Melbourne Melbourne Medical School, Allergy and Lung Health Unit, Melbourne School of Population and Global Health<br/>         Torén, Kjell; Goteborgs universitet Institutionen for medicin, Occupational and Environmental Medicine<br/>         Garcia Larsen, Vanessa; Johns Hopkins University Bloomberg School of Public Health, 17Program in Human Nutrition, Department of International Health<br/>         Jögi, Rain; Tartu University Hospital, The Lung Clinic<br/>         Gislason, Thorarinn; University of Iceland, Faculty of Medicine; Landspítali háskólasjúkrahús, Department of Sleep<br/>         Janson, Christer; Uppsala University, Department of Medical Sciences: Respiratory, Allergy and Sleep Research</p> |
| Keywords:                     | SLEEP MEDICINE, EPIDEMIOLOGY, PRIMARY CARE, PUBLIC HEALTH, SPORTS MEDICINE                                                                                                                                                                                                                                                                                                                                                                                                                                                                                                                                                                                                                                                                                                                                                                                                                                                                                                                                                                                                                                                                                                                                                                                                                                                                                                                                                                                                                                                                                                                                                                                                                                                                                                                                                                                                                                                                                                                                                                                                                                                              |
|                               |                                                                                                                                                                                                                                                                                                                                                                                                                                                                                                                                                                                                                                                                                                                                                                                                                                                                                                                                                                                                                                                                                                                                                                                                                                                                                                                                                                                                                                                                                                                                                                                                                                                                                                                                                                                                                                                                                                                                                                                                                                                                                                                                         |

1  
2  
3  
4  
5  
6  
7  
8  
9  
10  
11  
12  
13  
14  
15  
16  
17  
18  
19  
20  
21  
22  
23  
24  
25  
26  
27  
28  
29  
30  
31  
32  
33  
34  
35  
36  
37  
38  
39  
40  
41  
42  
43  
44  
45  
46  
47  
48  
49  
50  
51  
52  
53  
54  
55  
56  
57  
58  
59  
60

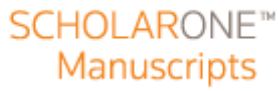

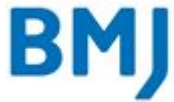

I, the Submitting Author has the right to grant and does grant on behalf of all authors of the Work (as defined in the below author licence), an exclusive licence and/or a non-exclusive licence for contributions from authors who are: i) UK Crown employees; ii) where BMJ has agreed a CC-BY licence shall apply, and/or iii) in accordance with the terms applicable for US Federal Government officers or employees acting as part of their official duties; on a worldwide, perpetual, irrevocable, royalty-free basis to BMJ Publishing Group Ltd ("BMJ") its licensees and where the relevant Journal is co-owned by BMJ to the co-owners of the Journal, to publish the Work in this journal and any other BMJ products and to exploit all rights, as set out in our [licence](#).

The Submitting Author accepts and understands that any supply made under these terms is made by BMJ to the Submitting Author unless you are acting as an employee on behalf of your employer or a postgraduate student of an affiliated institution which is paying any applicable article publishing charge ("APC") for Open Access articles. Where the Submitting Author wishes to make the Work available on an Open Access basis (and intends to pay the relevant APC), the terms of reuse of such Open Access shall be governed by a Creative Commons licence – details of these licences and which [Creative Commons](#) licence will apply to this Work are set out in our licence referred to above.

Other than as permitted in any relevant BMJ Author's Self Archiving Policies, I confirm this Work has not been accepted for publication elsewhere, is not being considered for publication elsewhere and does not duplicate material already published. I confirm all authors consent to publication of this Work and authorise the granting of this licence.

# The longitudinal association of physical activity with symptoms of insomnia, sleep duration and daytime sleepiness - A European population-based study

Erla Bjornsdottir<sup>1\*</sup>, Elin Helga Thorarinsdottir<sup>2,3\*</sup>, Eva Lindberg<sup>4</sup>, Bryndis Benediktsdottir<sup>3,5</sup>, Karl A Franklin<sup>6</sup>, Deborah L Jarvis<sup>7,8</sup>, Pascal Demoly<sup>9</sup>, Jennifer Perret<sup>10</sup>, Judith Garcia-Aymerich<sup>11,12</sup>, Sandra Dorado-Arenas<sup>13</sup>, Joachim Heinrich<sup>14,15</sup>, Kjell Toren<sup>16</sup>, Vanessa Garcia Larsen<sup>17</sup>, Rain Jogi<sup>18</sup>, Thorarinn Gislason<sup>3,5\*\*</sup>, Christer Janson<sup>4\*\*</sup>

\*Co-first authors, \*\* Co-senior author

## Affiliations:

<sup>1</sup> University of Reykjavik, Iceland

<sup>2</sup> Primary Health Care of the Capital Area, Reykjavik, Iceland

<sup>3</sup> Faculty of Medicine, University of Iceland, Reykjavik, Iceland

<sup>4</sup> Department of Medical Sciences: Respiratory, Allergy and Sleep Research, Uppsala University, Uppsala, Sweden

<sup>5</sup> Department of Sleep, Landspítali - The National University Hospital of Iceland, Reykjavik, Iceland.

<sup>6</sup> Department of Surgical and Perioperative Sciences, Surgery, Umeå University, Umeå, Sweden

<sup>7</sup> Population Health and Occupational Disease, National Heart and Lung Institute, Imperial College London, London, UK

<sup>8</sup> MRC-PHE Centre for Environment and Health, Imperial College London, London, UK

<sup>9</sup> University Hospital of Montpellier, Montpellier, France and IDESP, University of Montpellier - Inserm UMR UA11

<sup>10</sup> University of Melbourne, Melbourne, Victoria, Australia.

<sup>11</sup> ISGlobal, Centre for Research in Environmental Epidemiology (CREAL), Barcelona, Spain

<sup>12</sup> Universitat Pompeu Fabra (UPF), Barcelona, Spain

<sup>13</sup> Pulmonology Department, Galdakao-Usansolo Hospital, OSI Barrualde-Galdakao (Osakidetza), Biscay, Spain

<sup>14</sup> Institute and Clinic for Occupational, Social and Environmental Medicine, University Hospital, LMU Munich, Comprehensive Pneumology Center (CPC-M) Munich, German Center for Lung Research (DZL)

<sup>15</sup> Allergy and Lung Health Unit, Melbourne School of Population and Global Health, The University of Melbourne, Melbourne, Australia

<sup>16</sup> Department of Occupational and Environmental Medicine, Institute of Medicine, Sahlgrenska Academy, University of Gothenburg, Gothenburg, Sweden

<sup>17</sup> Program in Human Nutrition, Department of International Health, The Johns Hopkins Bloomberg School of Public Health, Baltimore, USA.

<sup>18</sup> The Lung Clinic, Tartu University Hospital, Tartu, Estonia.

Correspondant author:

Erla Bjornsdottir

[erlabjo@gmail.com](mailto:erlabjo@gmail.com)

00354-8608009

### Financial Support for ECRHS III

**Australia:** National Health & Medical Research Council, **Belgium: Antwerp South, Antwerp City:** Research Foundation Flanders (FWO), grant code G.0.410.08.N.10 (both sites), **Estonia: Tartu-** SF0180060s09 from the Estonian Ministry of Education. **France: (All)** Ministère de la Santé. Programme Hospitalier de Recherche Clinique (PHRC) national 2010. **Bordeaux:** INSERM U897 Université Bordeaux segalen, **Grenoble:** Comite Scientifique AGIRadom 2011. **Paris:** Agence Nationale de la Santé, Région Ile de France, domaine d'intérêt majeur (DIM) **Germany : Erfurt:** German Research Foundation HE 3294/10-1 **Hamburg:** German Research Foundation MA 711/6-1, NO 262/7-1 **Iceland:** Reykjavik, The Landspítali University Hospital Research Fund, University of Iceland Research Fund, The Icelandic Collage of Family Physicians research found, ResMed Foundation, California, USA, Orkuveita Reykjavíkur (Geothermal plant), Vegagerðin (The Icelandic Road Administration (ICERA). The Icelandic Research found - grant no 173701-052 **Italy:** All Italian centres were funded by the Italian Ministry of Health, Chiesi Farmaceutici SpA, in addition **Verona** was funded by Cariverona foundation, Education Ministry (MIUR).

**Norway:** Norwegian Research council grant no 214123, Western Norway Regional Health Authorities grant no 911631, Bergen Medical Research Foundation. **Spain:** Fondo de Investigación Sanitaria (PS09/02457, PS09/00716 09/01511) PS09/02185 PS09/03190), Servicio Andaluz de Salud , Sociedad Española de Neumología y Cirugía Torácica (SEPAR 1001/2010); **Sweden:** All centres were funded by The Swedish Heart and Lung Foundation, The Swedish Asthma and Allergy Association, The Swedish Association against Lung and Heart Disease.Fondo de Investigación Sanitaria (PS09/02457 **Barcelona:**Fondo de Investigación Sanitaria (FIS PS09/00716) **Galdakao:** Fondo de Investigación Sanitaria (FIS 09/01511) **Huelva:** Fondo de Investigación Sanitaria (FIS PS09/02185) and Servicio Andaluz de Salud **Oviedo:** Fondo de Investigación Sanitaria (FIS PS09/03190) **Sweden:** All centres were funded by The Swedish Heart and Lung Foundation, The Swedish Asthma and Allergy Association, The Swedish Association against Lung and Heart Disease. **Swedish Research Council for health, working life and welfare (FORTE) Göteborg :** Also received further funding from the Swedish Council for Working life and Social Research. Umea also received funding from Vasterbotten Country Council ALF grant. **Switzerland:** The Swiss National Science Foundation (grants no 33CSCO-134276/1, 33CSCO-108796, 3247BO-104283, 3247BO-104288, 3247BO-104284, 3247-065896, 3100-059302, 3200-052720, 3200-042532, 4026-028099) The Federal office for forest, environment and landscape, The Federal Office of Public Health, The Federal Office of Roads and Transport, the canton's government of Aargau, Basel-Stadt, Basel-Land, Geneva, Luzern, Ticino, Valais and Zürich, the Swiss Lung League, the canton's Lung League of Basel Stadt/ Basel, Landschaft, Geneva, Ticino, Valais and Zurich, SUVA, Freiwillige Akademische Gesellschaft, UBS Wealth Foundation, Talecris Biotherapeutics GmbH, Abbott Diagnostics, European Commission 018996 (GABRIEL), Wellcome Trust WT 084703MA, **UK:** Medical Research Council (Grant Number 92091). Support also provided by the National Institute for Health Research through the Primary Care Research Network

**Abstract:**

*Objectives:* To explore the relationship of physical activity during the past 10 years with insomnia, daytime sleepiness and estimated short or long sleep duration among middle aged adults.

*Design:* Population-based, multi-centre cohort study.

*Setting:* 21 centres in 9 European countries.

*Methods:* Included were 4339 participants in the third follow-up of the European Community Respiratory Health Survey (ECRHS III) who answered questions on physical activity at baseline (ECRHS II) and questions on physical activity, insomnia symptoms, sleep duration and daytime sleepiness at follow up (ECRHS III). Physical activity was assessed both in ECRHS III and 10 years before. Participants reported that they exercised with a frequency of at least two or more times a week for one hour a week or more were classified as being physically active. Change in activity status was categorised into four groups: persistently non-active, became inactive, became active and persistently active.

*Main outcome measures:* Insomnia, sleep time and daytime sleepiness in relation to physical activity.

*Results:* Altogether, 37% of participants were persistently non-active, 25% were persistently active, 20% became inactive and 18% became active from baseline to follow up. Participants that were persistently active were less likely to report difficulties initiating sleep (OR 0.60 (95% CI 0.45-0.78)), short sleep duration of  $\leq 6$  h/night (OR 0.71 (95% CI 0.59-0.85) and long sleep of ( $\geq 9$  h/night (OR 0.53 (95% CI 0.33-0.84)) than persistently non active subjects after adjusting for age, sex, BMI, smoking history, and study centre. Daytime sleepiness and difficulties maintaining sleep were not related to physical activity.

*Conclusion:* Physically active people have a lower risk of insomnia symptoms and extreme sleep duration, both long and short.

**Strengths and limitations of this study:**

- The longitudinal study design, with the exposure (physical activity) measured 10 years before the outcome (sleep outcomes) allows testing the directionality of the association.
- Data was collected using standardized and validated procedures and instruments, increasing internal validity.
- Data was obtained from 9 European countries, increasing external validity of our findings.
- One limitation of our study is that sleep variables are only available at the follow-up, precluding testing their role on baseline physical activity.
- Insomnia symptoms, sleep length and daytime sleepiness were obtained from questionnaire and no doctor diagnosis or objective assessments were available.



## Introduction

Disturbed sleep is common in the general population and impacts health and quality of life.<sup>1-3</sup> Chronic sleep disturbances are associated with cardiovascular disease, metabolic dysfunction, psychiatric disorders, and increased mortality.<sup>4-6</sup>

Regular exercise is associated with better health and several studies suggest that physical activity (PA) is beneficial on sleep and may improve symptoms of chronic insomnia.<sup>7-10</sup> It is, however, unclear how large these benefits are and which factors moderate these benefits.<sup>11</sup> The positive association between PA and sleep might be subject to multiple moderating factors such as gender, age, BMI, fitness level, general health and the characteristics of the exercise. Therefore, sleep and PA probably influence each other through complex, reciprocal interactions including multiple physiological and psychological pathways.<sup>7</sup>

There is evidence that more PA is associated with less daytime sleepiness.<sup>12-17</sup> Cross-sectional studies have shown that low PA is associated with increased likelihood of excessive daytime sleepiness (EDS)<sup>14-16</sup> and that subjects participating in exercise are less likely to have EDS.<sup>12 17</sup> In the elderly, increasing PA by doing home exercises has been shown to improve EDS and reduce the prevalence of insomnia symptoms<sup>13</sup> and another study showed that increasing PA protected women from future insomnia.<sup>18</sup> Other studies have contradictory findings. In an epidemiological study of 4.405 Koreans, daytime sleepiness was more common among those in the top quartile of PA compared to those in the lowest quartile group.<sup>19</sup> Among patients with obstructive sleep apnoea increased PA was associated with lower disease severity and 28% decrease in EDS.<sup>20</sup> The daily association between PA and sleep duration was described in 2021 based on a systemic review and meta-analysis on 33 peer-reviewed papers showing that the night following an increased PA there was a lower total sleep time.<sup>21</sup>

There is a lack of epidemiological data from long-term follow-up of large cohorts studying the association of PA to sleep length, daytime sleepiness, and insomnia symptoms. Previous research on physical activity and sleep-related outcomes has several important limitations. Most studies are cross-sectional or with a short follow-up, preventing to elucidate if increased physical activity improves sleeping outcomes or reduced physical activity is a consequence of sleep problems. Finally, no studies have tested at the same time the effect of physical activity on sleep length, daytime sleepiness, and insomnia symptoms. Therefore, the aim of the

1  
2  
3 present study was to assess the interrelationship between physical activity based on  
4 frequency, duration and intensity and symptoms of insomnia, self-reported sleep  
5 duration and daytime sleepiness among middle-aged subjects from 21 centres in 9  
6 countries at two time periods 10 years apart, giving important longitudinal follow up  
7 data.  
8  
9  
10  
11  
12

## 13 **Material and methods**

### 14 *Patient and Public Involvement:*

15 We studied participants in the second and third follow-up of the European Community  
16 Respiratory Health Survey (ECRHS II and III, [www.ecrsh.org](http://www.ecrsh.org)), an international,  
17 population-based, multicentre cohort study of asthma and allergy, which was first  
18 performed in 1990. Detailed descriptions of the methods for ECRHS I and ECRHS II  
19 have been published elsewhere.<sup>22 23</sup> Briefly, participating centres first randomly  
20 selected samples of 20 to 44-year-old subjects. Participants completed a short postal  
21 questionnaire about asthma and asthma-like symptoms and from those who  
22 responded, a random sample was selected to undergo a more detailed clinical  
23 examination. In ECRHS II, subjects who had participated in the clinical phase of  
24 ECRHS I (performed between 1991 – 1994) were invited to participate in follow-up.  
25 The clinical phase of ECRHS II was performed between 1998 to 2002. ECRHS III is  
26 the second follow-up and was performed from February 2011 to January 2014.<sup>22-24</sup>  
27 The present study is based on data from ECRHS II and III (see figure 1 for flowchart).  
28 Ethical approval for the study from local research ethics committees and written  
29 consent from participants were obtained.  
30  
31  
32  
33  
34  
35  
36  
37  
38  
39  
40  
41  
42  
43

### 44 *Health, habits, and measurements*

45 Subjects answered the core ECRHS questionnaires which included questions  
46 on lifestyle, respiratory symptoms, smoking history, and general health. Current  
47 smokers were defined as those who smoked tobacco regularly during the last month.  
48 Former smokers were defined as smokers who denied having smoked regularly for a  
49 month prior to the examination. Those who reported no regular smoking at or prior to  
50 the examination were defined as never smokers. Height and weight were measured,  
51 and body mass index (BMI) was calculated.<sup>24</sup>  
52  
53  
54  
55  
56  
57  
58  
59  
60

### *Assessment of physical activity*

1  
2  
3 Physical activity was assessed in ECRHS II and III using questionnaire.<sup>22</sup>

4 Participants were asked how often and for how many hours per week they usually  
5 exercised so that they got out of breath or became sweaty. Participants who  
6 exercised two or more times a week during at least 1 hour a week were classified  
7 physically active. Change in activity status from baseline to follow up was categorised  
8 into four PA groups: persistently non-active (non-active at both baseline and follow  
9 up), became inactive (active at baseline and non-active at follow up), became active  
10 (non-active at baseline and active at follow up) and persistently active (active at both  
11 baseline and follow up).  
12  
13  
14  
15  
16  
17  
18  
19

### 20 *Sleep questionnaires and measurements*

21 Sleep-related symptoms were assessed by using the Basic Nordic Sleep  
22 Questionnaire<sup>25</sup>, where participants were asked about frequency of insomnia  
23 symptoms. Answers were on a scale of 1 – 5: (1) never or very seldom, (2) less than  
24 once a week, (3) once to twice a week, (4) three to five times a week, (5) every day  
25 or almost every day of the week. Insomnia symptoms were defined using answers to  
26 three questions from the Basic Nordic Sleep Questionnaire “I have difficulties falling  
27 asleep at night” (difficulties initiating sleep), “I wake up often during the night”  
28 (difficulties maintaining sleep) and “I wake up early in the morning and can’t fall back  
29 asleep” (early morning awakenings). Those who reported those symptoms of  
30 insomnia  $\geq 3$  times a week (scores 4 and 5) were considered to have the  
31 corresponding insomnia subtype. Daytime sleepiness was evaluated using the  
32 Epworth Sleepiness Scale, a brief questionnaire that measures daytime sleepiness  
33 based on the likelihood of falling asleep in eight different situations.<sup>26</sup> Participants  
34 with Epworth sleepiness scale score  $> 10$  were considered to have EDS. Participants  
35 answered the question: how much sleep do you estimate that you get on average  
36 each night? They were classified as short sleepers ( $\leq 6$  hours/night), normal sleepers  
37 (6–9 hours/night) and long sleepers ( $\geq 9$  hours/night) according to their answers.  
38  
39  
40  
41  
42  
43  
44  
45  
46  
47  
48  
49  
50  
51  
52

### 53 *Statistical analysis*

54 Data are presented as number and percentage or mean  $\pm$ SD, depending on  
55 distribution. For bivariate analysis, the  $\chi^2$  test and one-way analysis of variance were  
56 used for nominal and continuous variables. Logistic regression was used for  
57 multivariable analyses to estimate the association between physical activity and  
58  
59  
60

sleep related outcomes after adjusting for potential confounders such as sex, age, BMI and smoking status. STATA V.16 was used for all statistical analyses.

## Results

### *Participants and level of physical activity*

From a total of 5.850 participants in ECRHS II, we excluded those with missing data and included a total of 4.339 participants (48% men), see Figure 1. From baseline to 10 years later, 36.9% of participants were persistently non-active, 17.9% became physically active at follow-up, 20.3% of participants became inactive 24.9% were persistently active (Table 1).

**Table 1.** Characteristics and general health of the participants by the level of physical activity

|                                    | Persistently non-active | Became inactive | Became active | Persistently active | p-value          |
|------------------------------------|-------------------------|-----------------|---------------|---------------------|------------------|
| <b>General characteristics</b>     |                         |                 |               |                     |                  |
| N, %                               | 1601 (36.9)             | 881 (20.3)      | 775 (17.9)    | 1082 (24.9)         |                  |
| Men, %                             | 44.3                    | 49.0            | 46.8          | 53.7                | <b>&lt;0.001</b> |
| Age, years                         | 55.0 ± 7.2              | 54.5 ± 7.1      | 53.4 ± 7.2    | 53.7 ± 7.2          | <b>&lt;0.001</b> |
| Body mass index, kg/m <sup>2</sup> | 27.6 ± 5.2              | 27.1 ± 4.9      | 27.1 ± 4.8    | 27.0 ± 4.4          | <b>0.007</b>     |
| Currently working, %               | 82.7                    | 85.8            | 88.9          | 90.4                | <b>&lt;0.001</b> |
| <b>Smoking history</b>             |                         |                 |               |                     |                  |
| Never, %                           | 42.4                    | 43.4            | 44.3          | 47.6                | <b>&lt;0.001</b> |
| Former, %                          | 34.4                    | 39.8            | 37.5          | 40.0                |                  |
| Current, %                         | 23.2                    | 16.9            | 18.2          | 12.4                |                  |

There were geographical differences in the level of physical activity between the ECRHS countries (Figure 2). Participants in Norway were most likely to be persistently active, while participants in Spain, followed by Estonia, were most likely to be persistently non-active (Figure 2).

### *General characteristics and health*

Persistently active participants were more often men, they were younger, and they had slightly lower BMI (Table 1). They were also less likely to be current smokers and more likely to be currently working (Table 1).

### *Insomnia symptoms*

In unadjusted analysis, there was a significant difference in reporting difficulties initiating sleep, early morning awakenings and any insomnia symptom where those persistently active were least likely to report these symptoms. Also, persistently active subjects were the least likely to report two and three insomnia symptoms (Table 2).

**Table 2.** Insomnia symptoms, sleep duration and daytime sleepiness by level of physical activity.

|                                                                                                                                                                                                                                            | <b>Persistently non-active</b><br>(n=1601) | <b>Became inactive</b><br>(n=881) | <b>Became active</b><br>(n=775) | <b>Persistently Active</b><br>(n=1082) | p-value          |
|--------------------------------------------------------------------------------------------------------------------------------------------------------------------------------------------------------------------------------------------|--------------------------------------------|-----------------------------------|---------------------------------|----------------------------------------|------------------|
| <b>Insomnia symptoms</b>                                                                                                                                                                                                                   |                                            |                                   |                                 |                                        |                  |
| Difficulties initiating sleep (%)                                                                                                                                                                                                          | 15.4                                       | 14.0                              | 11.7                            | 8.2                                    | <b>&lt;0.001</b> |
| Difficulties maintaining sleep (%)                                                                                                                                                                                                         | 31.9                                       | 32.1                              | 33.0                            | 28.5                                   | 0.128            |
| Early morning awakenings (%)                                                                                                                                                                                                               | 18.2                                       | 18.3                              | 15.0                            | 13.2                                   | <b>0.002</b>     |
| Any insomnia symptom (%)                                                                                                                                                                                                                   | 41.0                                       | 41.5                              | 39.5                            | 34.9                                   | <b>0.006</b>     |
| <b>Numbers of insomnia symptoms</b>                                                                                                                                                                                                        |                                            |                                   |                                 |                                        |                  |
| None (%)                                                                                                                                                                                                                                   | 58.4                                       | 58.2                              | 61.0                            | 64.9                                   | <b>0.001</b>     |
| One (%)                                                                                                                                                                                                                                    | 23.2                                       | 25.2                              | 24.0                            | 23.8                                   |                  |
| Two (%)                                                                                                                                                                                                                                    | 11.9                                       | 10.6                              | 10.0                            | 7.8                                    |                  |
| Three (%)                                                                                                                                                                                                                                  | 6.6                                        | 6.1                               | 5.1                             | 3.6                                    |                  |
| <b>Sleep duration</b>                                                                                                                                                                                                                      |                                            |                                   |                                 |                                        |                  |
| Sleep time (hours)                                                                                                                                                                                                                         | 6.8 ± 1.1                                  | 6.8 ± 1.0                         | 6.9 ± 1.0                       | 6.9 ± 0.9                              | 0.234            |
| <b>Sleep time, %</b>                                                                                                                                                                                                                       |                                            |                                   |                                 |                                        |                  |
| Short sleepers (≤ 6 hours)                                                                                                                                                                                                                 | 35.9                                       | 31.9                              | 20.7                            | 26.9                                   | <b>&lt;0.001</b> |
| Normal sleepers (6 – 9 hours)                                                                                                                                                                                                              | 59.2                                       | 64.6                              | 66.9                            | 70.9                                   |                  |
| Long sleepers (≥ 9 hours)                                                                                                                                                                                                                  | 4.9                                        | 3.5                               | 3.4                             | 2.2                                    |                  |
| <b>Daytime sleepiness</b>                                                                                                                                                                                                                  |                                            |                                   |                                 |                                        |                  |
| Epworth sleepiness scale score                                                                                                                                                                                                             | 6.8 ± 4.1                                  | 7.2 ± 4.1                         | 6.9 ± 4.1                       | 6.9 ± 3.8                              | 0.106            |
| Epworth sleepiness scale score >10 (%)                                                                                                                                                                                                     | 17.2                                       | 19.4                              | 17.7                            | 15.6                                   | 0.176            |
| Data are presented as mean ± standard deviation or % where indicated. Significant differences are in bold (p<0.05). *p-value from Pearson's chi-square test (numerical variables) and one-way analysis of variance (continuous variables). |                                            |                                   |                                 |                                        |                  |

After adjusting for age, sex, BMI, smoking history and study centre, this negative association remained for difficulties initiating sleep (OR 0.58 (0.42-0.77)), any insomnia symptom (0.78 (0.65-0.94) and reporting two (OR 0.60 (0.43-0.82) and

three (OR 0.63 (0.41-0.98) insomnia symptoms (Table 3). Additionally, in adjusted analysis, persistently active subjects were significantly less likely to report difficulties initiating sleep (OR 0.80 (0.66-0.97) (Table 3).

**Table 3.** Independent association between the level of physical activity and medical disorders, insomnia symptoms, daytime sleepiness and sleep duration expressed as adjusted\* odds ratios (95% CI) with the persistently non-active group as reference.

|                                                                                               | Became inactive<br>(n=881) | Became active<br>(n=775) | Persistently<br>active<br>(n=1082) |
|-----------------------------------------------------------------------------------------------|----------------------------|--------------------------|------------------------------------|
| <b>Insomnia symptoms</b>                                                                      |                            |                          |                                    |
| Difficulties initiating sleep                                                                 | 0.97 (0.75-1.25)           | 0.82 (0.62-1.08)         | <b>0.58 (0.42-0.77)</b>            |
| Difficulties maintaining sleep                                                                | 0.96 (0.80-1.17)           | 1.04 (0.85-1.27)         | <b>0.80 (0.66-0.97)</b>            |
| Early morning awakenings                                                                      | 1.09 (0.87-1.38)           | 0.86 (0.63-1.03)         | 0.80 (0.63-1.03)                   |
| Any insomnia symptom                                                                          | 1.02 (0.85-1.22)           | 0.95 (0.78-1.14)         | <b>0.78 (0.65-0.94)</b>            |
| Numbers of insomnia symptoms                                                                  |                            |                          |                                    |
| One                                                                                           | 1.07 (0.86-1.32)           | 0.99 (0.79-1.24)         | 0.91 (0.74-1.12)                   |
| Two                                                                                           | 0.89 (0.66-1.20)           | 0.86 (0.63-1.17)         | <b>0.60 (0.43-0.82)</b>            |
| Three                                                                                         | 1.09 (0.74-1.59)           | 0.94 (0.62-1.42)         | <b>0.63 (0.41-0.98)</b>            |
| <b>Daytime sleepiness</b>                                                                     |                            |                          |                                    |
| Epworth sleepiness scale score >10                                                            | 1.17 (0.94-1.47)           | 1.00 (0.78-1.27)         | 0.87 (0.69-1.10)                   |
| <b>Sleep duration</b>                                                                         |                            |                          |                                    |
| Short sleepers ( $\leq 6$ hours)                                                              | 0.89 (0.73-1.07)           | 0.85 (0.69-1.03)         | <b>0.71 (0.58-0.85)</b>            |
| Normal sleepers (6-9 hours)                                                                   | 1.18 (0.98-1.42)           | <b>1.21 (1.00-1.47)</b>  | <b>1.55 (1.29-1.87)</b>            |
| Long sleepers ( $\geq 9$ hours)                                                               | 0.74 (0.47-1.17)           | 0.84 (0.53-1.33)         | <b>0.48 (0.28-0.80)</b>            |
| *Adjusted for age, sex, BMI, smoking history and center. Significant differences are in bold. |                            |                          |                                    |

### *Sleep duration and daytime sleepiness*

In unadjusted analysis, there was a significant difference in short and long sleep duration between levels of activity. Those who were persistently active were most likely to be normal sleepers and the persistently non-active were least likely (70.9% vs. 59.2% respectively) (Table 2). After adjusting for age, sex, BMI, smoking history and study centre, these results remained significant for persistently active subjects. They were significantly more likely to be normal sleepers (OR 1.55 (1.29-1.87)) and significantly less likely to be short sleepers (OR 0.71 (0.58-0.85)) or long sleepers (0.48 (0.28-0.80)) (Table 3). Additionally, those who became active were more likely to be normal sleepers than those persistently non-active (OR 1.21 (1.00-1.47) (Table 3).

1  
2  
3 However, there was not a significant association between the mean Epworth  
4 sleepiness scale score or percentage with Epworth sleepiness scale score >10 and  
5 level of physical activity (Tables 2 and 3).  
6  
7  
8  
9  
10  
11  
12  
13  
14  
15  
16  
17  
18  
19  
20  
21  
22  
23  
24  
25  
26  
27  
28  
29  
30  
31  
32  
33  
34  
35  
36  
37  
38  
39  
40  
41  
42  
43  
44  
45  
46  
47  
48  
49  
50  
51  
52  
53  
54  
55  
56  
57  
58  
59  
60

For peer review only

## Discussion

The main results of this study were that participants who reported being physically active at the start and end of a 10 year follow up period were less likely to report insomnia symptoms at the follow-up. We also found that subjects that are persistently active are more likely to sleep the recommended 6-9 hours. This association remained statistically significant after adjusting for sex, age, smoking history, and BMI.

Our results are in line with previous studies that have shown a beneficial effect of physical activity on symptoms of insomnia (9, 10), but the current study additionally shows the importance of consistency in exercise over time because the association was lost in initially active subjects who became inactive. A recent meta-analysis examining the effects of acute and regular exercise on a range of sleep variables showed that acute exercise (less than one week of exercise) has a small beneficial effect on many objective measures of sleep such as total sleep time, symptoms of insomnia and sleep quality.<sup>7</sup> Furthermore, this meta-analysis found greater benefits for regular exercise on both subjective and objective sleep parameters over time. Regular exercise had small beneficial effects on total sleep time and sleep efficiency, small-to-medium beneficial effects on sleep onset latency, and moderate beneficial effects on sleep quality.<sup>7</sup>

There are two recent systematic reviews and meta-analysis on the effects of PA on sleep<sup>7</sup> and insomnia<sup>9</sup> both substantially reviewing the same randomized controlled studies. Banno *et al.* included nine studies with a total of 557 participants.<sup>7</sup> The majority of participants exercised 3 times or less per week and follow-up was 4 months or shorter in all studies except one. Their conclusion was that exercise could improve sleep, but higher quality research was needed.<sup>7</sup> Five studies on insomnia and additionally six on insomnia symptoms showed shorter sleep latency and higher sleep efficacy, but the authors also acknowledged the small size of the literature and severe methodological limitations often based on selection bias.<sup>9</sup> Most previous studies are also cross-sectional which can also be considered a limitation.

This study has a long follow up period (10 years) and indicates strongly that consistency in physically activity might be an important factor to optimize sleep duration and reduce symptoms of insomnia. Most other studies have had a much



1  
2  
3 shorter follow up period<sup>7</sup> which makes it more difficult to assess consistency in  
4 activity over time.

5  
6 Our results indicate that those who are consistent in physical activity are also less  
7 likely to be both short (<6h) and long sleepers (>9h). Those who are physically active  
8 in general are also more likely to engage in a healthier lifestyle<sup>27</sup> which also can have  
9 an effect on sleep. Lifestyle factors such as healthy diet and physical activity are  
10 probably a part of a phenotype that characterizes those individuals who are generally  
11 engaged in a healthy lifestyle. A recent review highlighted the importance of focusing  
12 on the combination of sleep, diet and exercise when exploring healthy longevity.<sup>28</sup>  
13  
14  
15  
16  
17  
18  
19

20 The three groups reporting low physical activity in either ECRHS survey or at both  
21 time points are all reporting very similar prevalence of insomnia symptoms, extreme  
22 sleep length and daytime sleepiness. This is somewhat surprising, especially that  
23 those who are active at the follow-up but were not at baseline do have very similar  
24 symptom profile as those who were inactive at both surveys. Our study found a  
25 consistency in a behaviour like physical activity for more than a decade is strongly  
26 related to less insomnia and more “normal” sleep length. The important information  
27 concerning “the healthy phenotype” would be missed if the physical activity data were  
28 available only at baseline or at follow-up but not at both time points. Under these  
29 circumstances physical activity data would only have shown very limited association  
30 with sleep.  
31  
32  
33  
34  
35  
36  
37  
38

39 In a recent review based on 22 randomized controlled trials on the effects of regular  
40 exercise (lasting at least 2 months on a regular basis) on self-reported sleep quality,  
41 insomnia and daytime sleepiness, it was found that regular physical activity improved  
42 subjective sleep quality, insomnia severity, and daytime sleepiness as measured only  
43 with the Epworth sleepiness scale.<sup>29</sup> These results regarding insomnia symptoms are  
44 in line with our study but the results on daytime sleepiness differ from our results. The  
45 reason for this discrepancy could be due to different study populations since there  
46 were only two studies in this review that measured daytime sleepiness using the  
47 Epworth sleepiness scale, one study assessed this among the elderly, 60 years and  
48 older<sup>13</sup> and the other among overweight and obese men.<sup>30</sup> Another recent review of  
49 32 randomized control trials on the effects of exercise on improving sleep  
50 disturbances showed that exercise is beneficial in improving sleep quality, symptoms  
51 of insomnia, restless legs, sleep apnoea and daytime sleepiness. However, exercise  
52  
53  
54  
55  
56  
57  
58  
59  
60

1  
2  
3 only had significant effects on sleepiness if it had lasted for more than 12 weeks  
4 while the exercise period did not matter in regards of the association to sleep quality  
5 and insomnia symptoms.<sup>31</sup>  
6  
7

8 Another recent study showed that high or increasing levels of physical activity could  
9 protect women from future insomnia.<sup>18</sup> Therefore, exercise seems to have a stronger  
10 association with sleep quality and insomnia than with sleepiness, which is in line with  
11 our results. However almost all previous studies, have the limitation that the definition  
12 of sleepiness is limited to the estimate the likelihood of falling asleep but not the  
13 general feeling of sleepiness, that we have shown is also an important part of  
14 sleepiness.<sup>32 33</sup> Another recent review exploring the associations of exercise, sleep  
15 and cognitive function among older adults showed interesting results. Physical  
16 activity is associated with improved cognitive function but the association of sleep  
17 and cognitive function seems to be U-shaped, as too much or too little sleep is  
18 negatively associated with cognitive function.<sup>34</sup> It would therefore be interesting for  
19 future studies to explore how cognitive function is affected by the association of  
20 physical activity and sleep.  
21  
22  
23  
24  
25  
26  
27  
28  
29  
30  
31

32 This study has several strengths such as the population-based nature, the  
33 longitudinal study design and the large sample collected in the same manner at many  
34 centres in 9 different countries. Another strength is the use of standardized and  
35 validated procedures and instruments. The long follow up period is also a strength  
36 since data on physical activity is collected ten years apart and subjects are  
37 categorized according to change in physical activity. This study is however not  
38 without limitations. It is not possible to know whether those who are active at both  
39 timepoints have been continuously physically active throughout the study period or  
40 only at these two timepoints. Another limitation of our study is that sleep variables are  
41 only available at the follow-up, and we only have information on insomnia symptoms  
42 but not the diagnosis of insomnia disorder. Sleep length and daytime sleepiness are  
43 also based on subjective data. Another limitation is that physical activity was only  
44 measured using a questionnaire. Also, the questions included only vigorous physical  
45 activity and the effect of moderate or low intensity activity could not be tested.  
46  
47  
48  
49  
50  
51  
52  
53  
54  
55  
56  
57  
58  
59  
60

1  
2  
3 In conclusion, physical activity over time is associated with lower prevalence of  
4 insomnia symptoms and a more likelihood of sleeping the recommended 6-9 hours  
5 per night.  
6  
7  
8  
9

#### 10 **Ethical statement:**

11 All participants participated voluntarily in the study. Ethical approval for the study  
12 from local research ethics committees and written consent from participants were  
13 obtained.  
14  
15  
16  
17

18  
19 **Contributors** EB and EHT drafted the paper, participated in designing the study and  
20 performed the statistical analysis. CJ and EL designed the study, participated in  
21 manuscript preparation and reviewed the paper on several stages. CJ also  
22 contributed to the statistical analysis. BB participated in data collection and reviewing  
23 the paper. KF, DLJ, PD, JP, JG-A, SDA, JH, KT, VGL, RJ contributed to the statistical  
24 analysis and reviewed the paper. TG and CJ are the correspondence author, and he  
25 designed the study, participated in manuscript preparation and reviewed the paper  
26 on several stages.  
27  
28  
29  
30  
31  
32  
33

34 **Funding** The ALEC Study is funded by the European Union's Horizon 2020  
35 Research and Innovation programme under grant agreement No 633212.  
36  
37  
38

39 **Competing interests** None declared.  
40  
41  
42

43 **Data sharing statement** No additional data available.  
44  
45  
46  
47  
48  
49  
50  
51  
52

#### 53 **References**

- 54  
55 1. Benca RM. Diagnosis and treatment of chronic insomnia: a review. *Psychiatr Serv* 2005;56(3):332-  
56 43. doi: 10.1176/appi.ps.56.3.332 [published Online First: 2005/03/05]  
57 2. Gottlieb DJ, Redline S, Nieto FJ, et al. Association of usual sleep duration with hypertension: the  
58 Sleep Heart Health Study. *Sleep* 2006;29(8):1009-14. doi: 10.1093/sleep/29.8.1009  
59 [published Online First: 2006/09/02]  
60

3. Sivertsen B, Lallukka T, Salo P, et al. Insomnia as a risk factor for ill health: results from the large population-based prospective HUNT Study in Norway. *J Sleep Res* 2014;23(2):124-32. doi: 10.1111/jsr.12102 [published Online First: 2014/03/19]
4. Gangwisch JE, Heymsfield SB, Boden-Albala B, et al. Short sleep duration as a risk factor for hypertension: analyses of the first National Health and Nutrition Examination Survey. *Hypertension* 2006;47(5):833-9. doi: 10.1161/01.HYP.0000217362.34748.e0 [published Online First: 2006/04/06]
5. Luyster FS, Strollo PJ, Jr., Zee PC, et al. Sleep: a health imperative. *Sleep* 2012;35(6):727-34. doi: 10.5665/sleep.1846 [published Online First: 2012/06/02]
6. Taheri S. The link between short sleep duration and obesity: we should recommend more sleep to prevent obesity. *Arch Dis Child* 2006;91(11):881-4. doi: 10.1136/adc.2005.093013 [published Online First: 2006/10/24]
7. Banno M, Harada Y, Taniguchi M, et al. Exercise can improve sleep quality: a systematic review and meta-analysis. *PeerJ* 2018;6:e5172. doi: 10.7717/peerj.5172 [published Online First: 2018/07/19]
8. Kredlow MA, Capozzoli MC, Hearon BA, et al. The effects of physical activity on sleep: a meta-analytic review. *J Behav Med* 2015;38(3):427-49. doi: 10.1007/s10865-015-9617-6 [published Online First: 2015/01/19]
9. Lowe H, Haddock G, Mulligan LD, et al. Does exercise improve sleep for adults with insomnia? A systematic review with quality appraisal. *Clin Psychol Rev* 2019;68:1-12. doi: 10.1016/j.cpr.2018.11.002 [published Online First: 2019/01/09]
10. Passos GS, Poyares D, Santana MG, et al. Effect of acute physical exercise on patients with chronic primary insomnia. *J Clin Sleep Med* 2010;6(3):270-5. [published Online First: 2010/06/25]
11. Kelley GA, Kelley KS. Exercise and sleep: a systematic review of previous meta-analyses. *J Evid Based Med* 2017;10(1):26-36. doi: 10.1111/jebm.12236 [published Online First: 2017/03/10]
12. Andrianasolo RM, Menai M, Galan P, et al. Leisure-Time Physical Activity and Sedentary Behavior and Their Cross-Sectional Associations with Excessive Daytime Sleepiness in the French SU.VI.MAX-2 Study. *Int J Behav Med* 2016;23(2):143-52. doi: 10.1007/s12529-015-9501-3 [published Online First: 2015/08/08]
13. Brandao GS, Gomes G, Brandao GS, et al. Home exercise improves the quality of sleep and daytime sleepiness of elderlies: a randomized controlled trial. *Multidiscip Respir Med* 2018;13:2. doi: 10.1186/s40248-017-0114-3 [published Online First: 2018/01/27]
14. Chasens ER, Sereika SM, Weaver TE, et al. Daytime sleepiness, exercise, and physical function in older adults. *J Sleep Res* 2007;16(1):60-5. doi: 10.1111/j.1365-2869.2007.00576.x [published Online First: 2007/02/21]
15. Hays JC, Blazer DG, Foley DJ. Risk of napping: excessive daytime sleepiness and mortality in an older community population. *J Am Geriatr Soc* 1996;44(6):693-8. doi: 10.1111/j.1532-5415.1996.tb01834.x [published Online First: 1996/06/01]
16. McClain JJ, Lewin DS, Laposky AD, et al. Associations between physical activity, sedentary time, sleep duration and daytime sleepiness in US adults. *Prev Med* 2014;66:68-73. doi: 10.1016/j.ypmed.2014.06.003 [published Online First: 2014/06/17]
17. Vuori I, Urponen H, Hasan J, et al. Epidemiology of exercise effects on sleep. *Acta Physiol Scand Suppl* 1988;574:3-7. [published Online First: 1988/01/01]
18. Sporndly-Nees S, Asenlof P, Lindberg E. High or increasing levels of physical activity protect women from future insomnia. *Sleep Med* 2017;32:22-27. doi: 10.1016/j.sleep.2016.03.017 [published Online First: 2017/04/04]
19. Joo S, Baik I, Yi H, et al. Prevalence of excessive daytime sleepiness and associated factors in the adult population of Korea. *Sleep Med* 2009;10(2):182-8. doi: 10.1016/j.sleep.2008.03.017 [published Online First: 2008/08/08]
20. Iftikhar IH, Kline CE, Youngstedt SD. Effects of exercise training on sleep apnea: a meta-analysis. *Lung* 2014;192(1):175-84. doi: 10.1007/s00408-013-9511-3 [published Online First: 2013/10/01]

- 1
- 2
- 3 21. Atoui S, Chevance G, Romain AJ, et al. Daily associations between sleep and physical activity: A
- 4 systematic review and meta-analysis. *Sleep Med Rev* 2021;57:101426. doi:
- 5 10.1016/j.smr.2021.101426 [published Online First: 2021/02/12]
- 6
- 7 22. Fuertes E, Carsin AE, Anto JM, et al. Leisure-time vigorous physical activity is associated with
- 8 better lung function: the prospective ECRHS study. *Thorax* 2018;73(4):376-84. doi:
- 9 10.1136/thoraxjnl-2017-210947 [published Online First: 2018/01/08]
- 10
- 11 23. Janson C, Anto J, Burney P, et al. The European Community Respiratory Health Survey: what are
- 12 the main results so far? European Community Respiratory Health Survey II. *Eur Respir J*
- 13 2001;18(3):598-611. doi: 10.1183/09031936.01.00205801 [published Online First:
- 14 2001/10/09]
- 15
- 16 24. Bjornsdottir E, Janson C, Lindberg E, et al. Respiratory symptoms are more common among short
- 17 sleepers independent of obesity. *BMJ Open Respir Res* 2017;4(1):e000206. doi:
- 18 10.1136/bmjresp-2017-000206 [published Online First: 2017/10/27]
- 19
- 20 25. Partinen M, Gislason T. Basic Nordic Sleep Questionnaire (BNSQ): a quantitated measure of
- 21 subjective sleep complaints. *J Sleep Res* 1995;4(S1):150-55. doi: 10.1111/j.1365-
- 22 2869.1995.tb00205.x [published Online First: 1995/06/01]
- 23
- 24 26. Johns MW. A new method for measuring daytime sleepiness: the Epworth sleepiness scale. *Sleep*
- 25 1991;14(6):540-5. doi: 10.1093/sleep/14.6.540 [published Online First: 1991/12/01]
- 26
- 27 27. Cobb-Clark DA, Kassenboehmer, S. C., & Schurer, S. Healthy habits: The connection between diet,
- 28 exercise, and locus of control. *Journal of Economic Behavior & Organization* 2014;98:1-28.
- 29
- 30 28. Min S, Masanovic B, Bu T, et al. The Association Between Regular Physical Exercise, Sleep
- 31 Patterns, Fasting, and Autophagy for Healthy Longevity and Well-Being: A Narrative Review.
- 32 *Front Psychol* 2021;12:803421. doi: 10.3389/fpsyg.2021.803421 [published Online First:
- 33 2021/12/21]
- 34
- 35 29. Xie Y, Liu S, Chen XJ, et al. Effects of Exercise on Sleep Quality and Insomnia in Adults: A
- 36 Systematic Review and Meta-Analysis of Randomized Controlled Trials. *Front Psychiatry*
- 37 2021;12:664499. doi: 10.3389/fpsyg.2021.664499 [published Online First: 2021/06/25]
- 38
- 39 30. Tan X, Alen M, Wiklund P, et al. Effects of aerobic exercise on home-based sleep among
- 40 overweight and obese men with chronic insomnia symptoms: a randomized controlled trial.
- 41 *Sleep Med* 2016;25:113-21. doi: 10.1016/j.sleep.2016.02.010 [published Online First:
- 42 2016/11/09]
- 43
- 44 31. Amiri S, Hasani J, Satkin M. Effect of exercise training on improving sleep disturbances: a
- 45 systematic review and meta-analysis of randomized control trials. *Sleep Med* 2021;84:205-
- 46 18. doi: 10.1016/j.sleep.2021.05.013 [published Online First: 2021/06/25]
- 47
- 48 32. Thorarinsdottir EH, Bjornsdottir E, Benediktsdottir B, et al. Definition of excessive daytime
- 49 sleepiness in the general population: Feeling sleepy relates better to sleep-related symptoms
- 50 and quality of life than the Epworth Sleepiness Scale score. Results from an epidemiological
- 51 study. *J Sleep Res* 2019;28(6):e12852. doi: 10.1111/jsr.12852 [published Online First:
- 52 2019/04/11]
- 53
- 54 33. Mazzotti DR, Keenan BT, Thorarinsdottir EH, et al. Is the Epworth Sleepiness Scale Sufficient to
- 55 Identify the Excessively Sleepy Subtype of OSA? *Chest* 2022;161(2):557-61. doi:
- 56 10.1016/j.chest.2021.10.027 [published Online First: 2021/11/11]
- 57
- 58 34. Mellow ML, Crozier AJ, Dumuid D, et al. How are combinations of physical activity, sedentary
- 59 behaviour and sleep related to cognitive function in older adults? A systematic review. *Exp*
- 60 *Gerontol* 2022;159:111698. doi: 10.1016/j.exger.2022.111698 [published Online First:
- 2022/01/14]

1  
2  
3  
4  
5  
6  
7  
8  
9  
10  
11  
12  
13  
14  
15  
16  
17  
18  
19  
20  
21  
22  
23  
24  
25  
26  
27  
28  
29  
30  
31  
32  
33  
34  
35  
36  
37  
38  
39  
40  
41  
42  
43  
44  
45  
46  
47  
48  
49  
50  
51  
52  
53  
54  
55  
56  
57  
58  
59  
60

For peer review only

1  
2  
3  
4  
5  
6  
7  
8  
9  
10  
11  
12  
13  
14  
15  
16  
17  
18  
19  
20  
21  
22  
23  
24  
25  
26  
27  
28  
29  
30  
31  
32  
33  
34  
35  
36  
37  
38  
39  
40  
41  
42  
43  
44  
45  
46  
47  
48  
49  
50  
51  
52  
53  
54  
55  
56  
57  
58  
59  
60

For peer review only

1  
2  
3  
4  
5  
6  
7  
8  
9  
10  
11  
12  
13  
14  
15  
16  
17  
18  
19  
20  
21  
22  
23  
24  
25  
26  
27  
28  
29  
30  
31  
32  
33  
34  
35  
36  
37  
38  
39  
40  
41  
42  
43  
44  
45  
46  
47  
48  
49  
50  
51  
52  
53  
54  
55  
56  
57  
58  
59  
60

For peer review only



**Figure 1.** Flow chart of the study population in the European community health survey (ECRSH)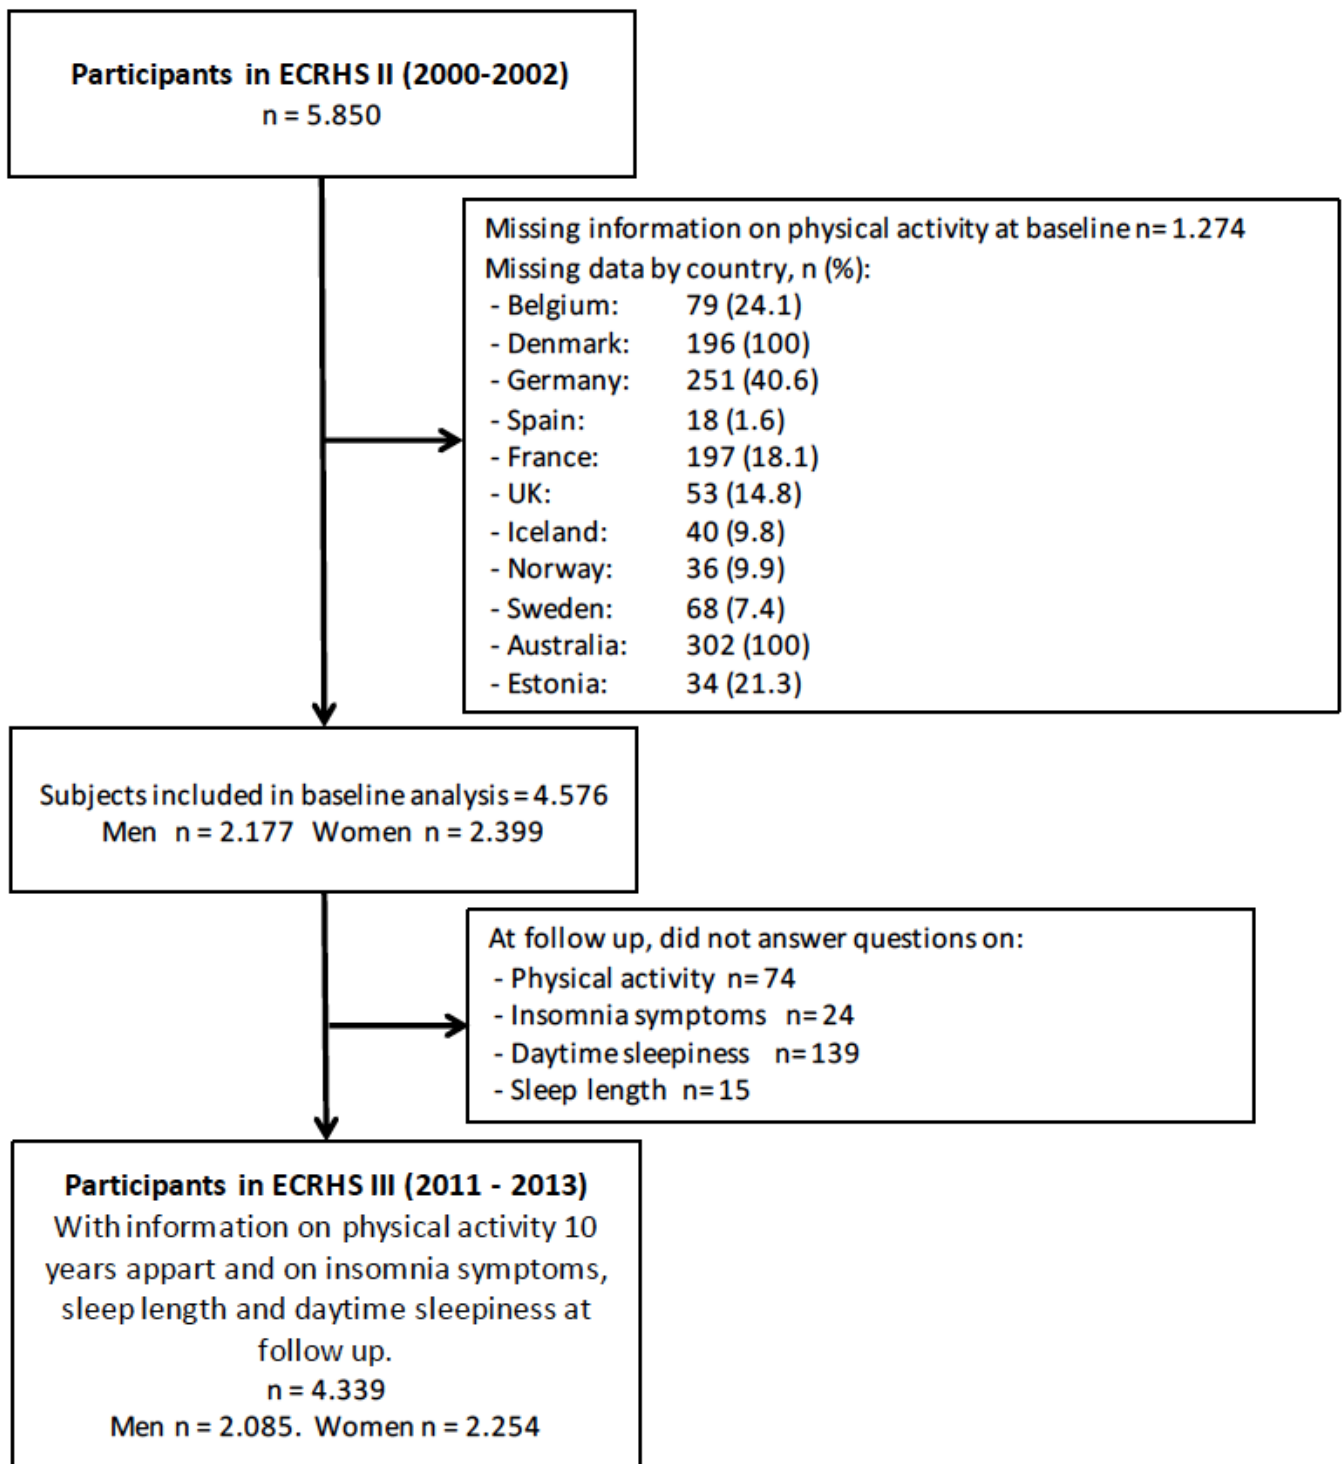

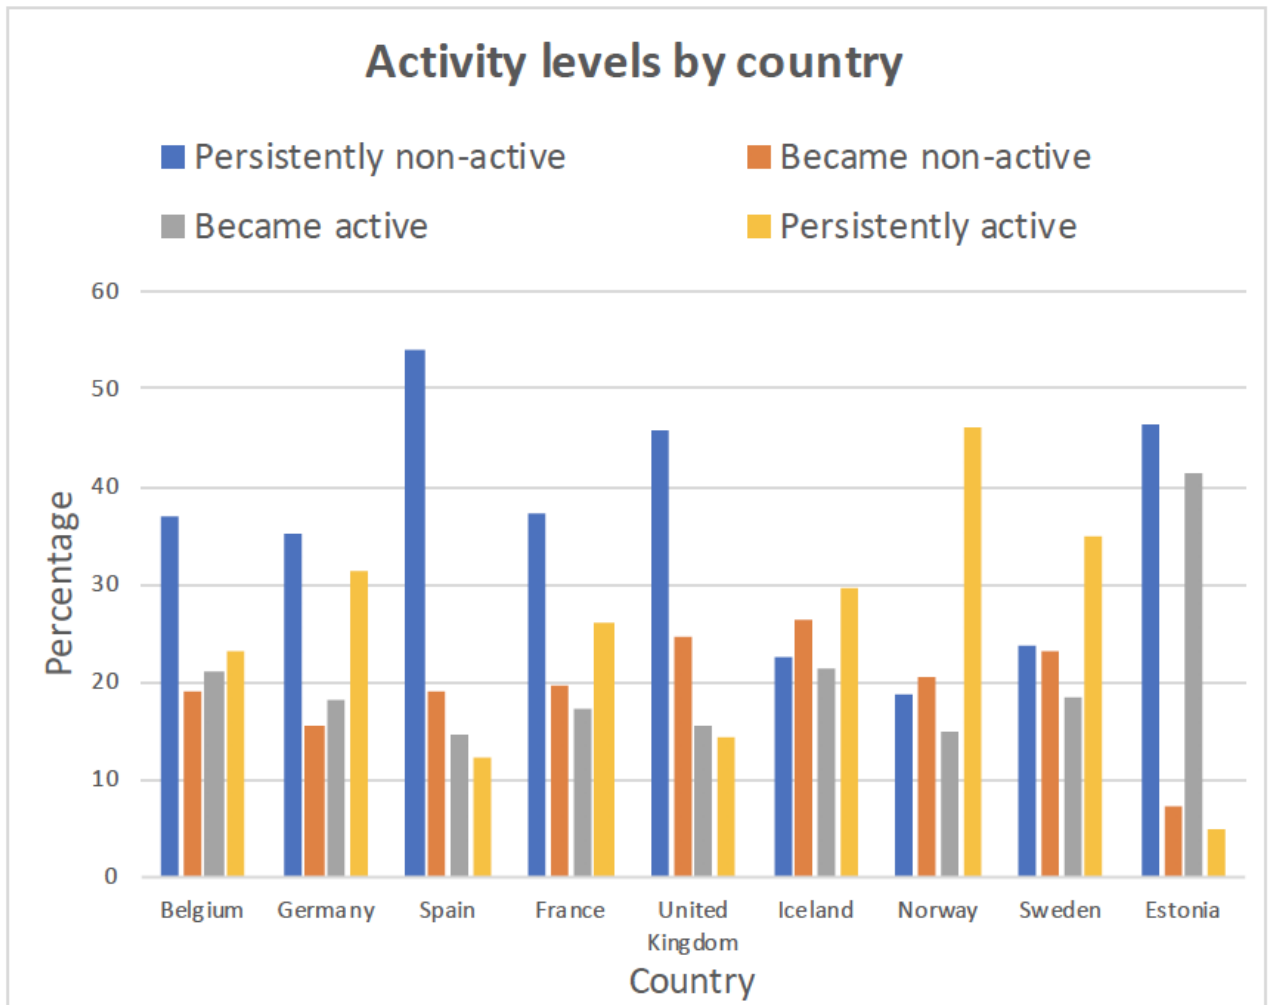

**Figure 2.** Activity levels by country

ew only

1  
2  
3  
4  
5  
6  
7  
8  
9  
10  
11  
12  
13  
14  
15  
16  
17  
18  
19  
20  
21  
22  
23  
24  
25  
26  
27  
28  
29  
30  
31  
32  
33  
34  
35  
36  
37  
38  
39  
40  
41  
42  
43  
44  
45  
46  
47  
48  
49  
50  
51  
52  
53  
54  
55  
56  
57  
58  
59  
60

For peer review only

Ethical approvals over lifetime of ECRHS 1,2, 3

Committee name and approval number

| Genetics | Centre Name & Country                   | ECRHS 1                                         | ECRHS 2                                                                 | ECRHS 3                                                                            |
|----------|-----------------------------------------|-------------------------------------------------|-------------------------------------------------------------------------|------------------------------------------------------------------------------------|
| N        | Australia, Melbourne                    | Alfred Hospital Ethics Review Committee 24 / 91 | The Alfred Healthcare Group Ethics Committee 24/91. (amendment)         | Monash University Human Research Ethics Committee Project # CF11/1818-2010001012   |
| N        | Belgium, South Antwerp and Antwerp City | Not available                                   | Not available                                                           | Comité voor Medische Ethiek UZA/UA 11/41/288 – UA                                  |
| N        | Denmark, Aarhus                         | Unable to find                                  | N/A                                                                     | De Videnskabetiske Komiteer for region Midtjylland. M-20110106                     |
| Y        | Estonia, Tartu                          | Cannot get the info, text redacted.             | Research Ethics Committee of the University of Tartu (UT REC) 60/3-1998 | Research Ethics Committee of the University of Tartu (UT REC) 209T-17 and 225/M-24 |

1  
2  
3  
4  
5  
6  
7  
8  
9  
10  
11  
12  
13  
14  
15  
16  
17  
18  
19  
20  
21  
22  
23  
24  
25  
26  
27  
28  
29  
30  
31  
32  
33  
34  
35  
36  
37  
38  
39  
40  
41  
42  
43  
44  
45  
46

|   |                  |                                                                                                                                                                                                                                                                                                              |                                                                                                                    |                                                                                                                                           |
|---|------------------|--------------------------------------------------------------------------------------------------------------------------------------------------------------------------------------------------------------------------------------------------------------------------------------------------------------|--------------------------------------------------------------------------------------------------------------------|-------------------------------------------------------------------------------------------------------------------------------------------|
| N | France, Paris    | Comité Consultatif National d'Ethique Pour les Sciences de la Vie et de la Santé, Section Technique, N/réf.AB/GM/91-298 - 19/07/91.<br><br>INSERM-Biomedical research authorization n°91020 (01/03/91), Approval of the Commission Nationale Informatique et Liberté (CNIL (protection of the data) 05/08/91 | Comité consultatif de protection des personnes dans la recherche biomédicale de Bichat-Claude Bernard". 17/11/1999 | Etude ECRHS III: promotion CHU de Grenoble. Ethical approval CPP Sud est V 4 mars 2011. Approval Ministry of Health AFSSAPS n°B110053-70. |
| Y | France, Grenoble | Comité Consultatif National                                                                                                                                                                                                                                                                                  | Comité consultatif de protection des                                                                               | Etude ECRHS III: promotion CHU                                                                                                            |

|   |                     |                                                                                                                                                                                                                                                                                         |                                                                                      |                                                                                                                   |
|---|---------------------|-----------------------------------------------------------------------------------------------------------------------------------------------------------------------------------------------------------------------------------------------------------------------------------------|--------------------------------------------------------------------------------------|-------------------------------------------------------------------------------------------------------------------|
|   |                     | <p>d'Ethique Pour les Sciences de la Vie et de la Santé, Section Technique, N/réf.AB/GM/91-298 - 19/07/91.</p> <p>INSERM-Biomedical research authorization n°91020 (01/03/91), Approval of the Commission Nationale Informatique et Liberté (CNIL (protection of the data) 05/08/91</p> | <p>personnes dans la recherche biomédicale de Bichat-Claude Bernard". 17/11/1999</p> | <p>de Grenoble. Ethical approval CPP Sud est V 4 mars 2011. Approval Ministry of Health AFSSAPS n°B110053-70.</p> |
| N | France, Montpellier | Comité Consultatif National d'Ethique Pour les Sciences de la Vie et de la                                                                                                                                                                                                              | Comité consultatif de protection des personnes dans la recherche                     | Etude ECRHS III : promotion CHU de Grenoble. Ethical approval CPP Sud est V 4                                     |

1  
2  
3  
4  
5  
6  
7  
8  
9  
10  
11  
12  
13  
14  
15  
16  
17  
18  
19  
20  
21  
22  
23  
24  
25  
26  
27  
28  
29  
30  
31  
32  
33  
34  
35  
36  
37  
38  
39  
40  
41  
42  
43  
44  
45  
46

|   |                  |                                                                                                                                                                                                                                                 |                                                                                         |                                                                     |
|---|------------------|-------------------------------------------------------------------------------------------------------------------------------------------------------------------------------------------------------------------------------------------------|-----------------------------------------------------------------------------------------|---------------------------------------------------------------------|
|   |                  | <p>Santé, Section Technique, N/réf.AB/GM/91-298 - 19/07/91.</p> <p>Inserm INSERM-Biomedical research authorization n°91020 (01/03/91), Approval of the Commission Nationale Informatique et Liberté (CNIL (protection of the data) 05/08/91</p> | <p>biomédicale de Bichat-Claude Bernard". 17/11/1999</p>                                | <p>mars 2011. Approval Ministry of Health AFSSAPS n°B110053-70.</p> |
| N | France, Bordeaux | Comité Consultatif National d'Ethique Pour les Sciences de la Vie et de la Santé, Section Technique,                                                                                                                                            | Comité consultatif de protection des personnes dans la recherche biomédicale de Bichat- | - Etude ECRHS III : promotion CHU de Grenoble. Ethical approval CPP |

|   |                  |                                                                                                                                                                                                                           |                                                                               |                                                                          |
|---|------------------|---------------------------------------------------------------------------------------------------------------------------------------------------------------------------------------------------------------------------|-------------------------------------------------------------------------------|--------------------------------------------------------------------------|
|   |                  | N/réf.AB/GM/91-298 - 19/07/91.<br><br>Promotion) Inserm INSERM-Biomedical research authorization n°91020 (01/03/91), Approval of the Commission Nationale Informatique et Liberté (CNIL (protection of the data) 05/08/91 | Claude Bernard". 17/11/1999                                                   | Sud est V 4 mars 2011. Approval Ministry of Health AFSSAPS n°B110053-70. |
| Y | Germany, Hamburg | Ethikkommission der Ärztekammer Schleswig-Hollstein, Positive Votum, no number                                                                                                                                            | Ethikkommission der Bayerischen Landesärztekammer (Positive Votum: Nr. 00079) | Ethikkommission der Bayerischen Landesärztekammer (Positive Votum: 10015 |



1  
2  
3  
4  
5  
6  
7  
8  
9  
10  
11  
12  
13  
14  
15  
16  
17  
18  
19  
20  
21  
22  
23  
24  
25  
26  
27  
28  
29  
30  
31  
32  
33  
34  
35  
36  
37  
38  
39  
40  
41  
42  
43  
44  
45  
46

|   |                    |                                                                              |                                                                                                                                                |                                                                                                                     |
|---|--------------------|------------------------------------------------------------------------------|------------------------------------------------------------------------------------------------------------------------------------------------|---------------------------------------------------------------------------------------------------------------------|
| Y | Germany, Erfurt    | Ethikkommission der Medizinischen Akademie Erfurt, Positive Votum, no number | Ethikkommission der Bayerischen Landesärztekammer (Positive Votum: Nr. 00079)                                                                  | Ethikkommission der Bayerischen Landesärztekammer (Positive Votum: 10015)                                           |
| N | Iceland, Reykjavik | ?                                                                            | ?                                                                                                                                              | National Bioethics committee of Iceland VSN-11-121-S3                                                               |
| N | Italy, Pavia       | No formal ethics committee-data unavailable                                  | Ethics Committee of Internal Medicine and Medical Therapy Department, Pavia University (The approval was reported in the memorandum n. 4/1999) | Ethics Committee of IRCCS "San Matteo" Hospital Foundation, University of Pavia, Pavia (approval number 24215/2011) |
| N | Italy, Turin       |                                                                              | ?                                                                                                                                              | ?                                                                                                                   |
| N | Italy, Verona      | N/A                                                                          | N/A                                                                                                                                            | "Comitato Etico per la sperimentazione dell'Azienda Ospedaliera Universitaria                                       |

|   |                             |                                                                                                  |                                                                                                                      |                                                                                                                                                |
|---|-----------------------------|--------------------------------------------------------------------------------------------------|----------------------------------------------------------------------------------------------------------------------|------------------------------------------------------------------------------------------------------------------------------------------------|
|   |                             |                                                                                                  |                                                                                                                      | Integrata di Verona", N. Prog. 1393                                                                                                            |
| N | Netherlands, Groningen      | ?                                                                                                | ?                                                                                                                    | ?                                                                                                                                              |
| N | Netherlands, Bergen-op-zoon | ?                                                                                                | ?                                                                                                                    | ?                                                                                                                                              |
| N | Netherlands, Geleen         | ?                                                                                                | ?                                                                                                                    | ?                                                                                                                                              |
| Y | Norway, Bergen              | The Regional Committee for Medical and Health Research Ethics West Norway Approval number: 42.91 | The Regional Committee for Medical and Health Research Ethics West Norway Approval number: 149.2000                  | Regional Ethics Committee West Norway 2010/759                                                                                                 |
|   | Barcelona, Spain            | JA cannot find                                                                                   | Ethics Committee of the Parc de Salut Mar, Barcelona (Comité del etico d'investigacion clínica (CEIC)- Parc de Salut | Ethics Committee of the Parc de Salut Mar, Barcelona (Comité del etico d'investigacion clínica (CEIC)- Parc de Salut Mar, Barcelona ( Approval |

1  
2  
3  
4  
5  
6  
7  
8  
9  
10  
11  
12  
13  
14  
15  
16  
17  
18  
19  
20  
21  
22  
23  
24  
25  
26  
27  
28  
29  
30  
31  
32  
33  
34  
35  
36  
37  
38  
39  
40  
41  
42  
43  
44  
45  
46

|   |                 |                |                                                                                                                                                           |                                                                                                                                                              |
|---|-----------------|----------------|-----------------------------------------------------------------------------------------------------------------------------------------------------------|--------------------------------------------------------------------------------------------------------------------------------------------------------------|
|   |                 |                | Mar, Barcelona) (Approval number 98/835/I)                                                                                                                | number) 2009/3500/1                                                                                                                                          |
| Y | Spain, Galdakao | JA cannot find | Ethics Committee of the Parc de Salut Mar, Barcelona (Comité etic d'investigacio clínica (CEIC)- Parc de Salut Mar, Barcelona) Approval number? 98/835/I) | Ethics Committee of the Parc de Salut Mar, Barcelona (Comité etic d'investigacio clínica (CEIC)- Parc de Salut Mar, Barcelona ( Approval num) 2009/3500/1    |
| Y | Spain, Albacete | Ja cannot find | Ethics Committee of the Parc de Salut Mar, Barcelona (Comité etic d'investigacio clínica (CEIC)- Parc de Salut Mar, Barcelona) Approval number? 98/835/I) | Ethics Committee of the Parc de Salut Mar, Barcelona (Comité etic d'investigacio clínica (CEIC)- Parc de Salut Mar, Barcelona ( Approval number) 2009/3500/1 |

|                                                                                                 |   |                    |                          |                                                                                                                                                           |                                                                                                                                                                    |
|-------------------------------------------------------------------------------------------------|---|--------------------|--------------------------|-----------------------------------------------------------------------------------------------------------------------------------------------------------|--------------------------------------------------------------------------------------------------------------------------------------------------------------------|
| 1<br>2<br>3<br>4<br>5<br>6<br>7<br>8<br>9<br>10<br>11<br>12<br>13<br>14<br>15<br>16<br>17<br>18 | Y | Oviedo, Spain      | Ja cannot find           | Ethics Committee of the Parc de Salut Mar, Barcelona (Comité etic d'investigacio clínica (CEIC)- Parc de Salut Mar, Barcelona) Approval number? 98/835/I) | Ethics Committee of the Parc de Salut Mar, Barcelona (Comité del etico d'investigacion clínica (CEIC)- Parc de Salut Mar, Barcelona ( Approval number) 2009/3500/1 |
| 19<br>20<br>21<br>22<br>23<br>24<br>25<br>26<br>27<br>28<br>29<br>30<br>31<br>32<br>33<br>34    | Y | Huelva, Spain      | JA cannot find- Manolis? | Ethics Committee of the Parc de Salut Mar, Barcelona (Comité etic d'investigacio clínica (CEIC)- Parc de Salut Mar, Barcelona) Approval number? 98/835/I) | Ethics Committee of the Parc de Salut Mar, Barcelona (Comité del etico d'investigacion clínica (CEIC)- Parc de Salut Mar, Barcelona ( Approval number) 2009/3500/1 |
| 35<br>36<br>37<br>38<br>39<br>40<br>41<br>42<br>43<br>44<br>45<br>46                            | Y | Basle, Switzerland | Unavailable              | Überregionale Ethikkommission für Klinische                                                                                                               | Swiss Academy of Sciences-Number not available                                                                                                                     |

1  
2  
3  
4  
5  
6  
7  
8  
9  
10  
11  
12  
13  
14  
15  
16  
17  
18  
19  
20  
21  
22  
23  
24  
25  
26  
27  
28  
29  
30  
31  
32  
33  
34  
35  
36  
37  
38  
39  
40  
41  
42  
43  
44  
45  
46

|   |                    |                                                                |                                                    |                                                                                      |
|---|--------------------|----------------------------------------------------------------|----------------------------------------------------|--------------------------------------------------------------------------------------|
|   |                    |                                                                | Forschung (UREK M175/99 123/00)                    |                                                                                      |
| N | Gothenburg, Sweden | Regional Ethical Review Board in Uppsala. 1990/257 and 1991/33 | Regional Ethical Review Board in Uppsala. 1999/313 | Regional Ethical Review Board in Uppsala. 2010/432                                   |
| Y | Uppsala, Sweden    | Regional Ethical Review Board in Uppsala. 1990/257 and 1991/33 | Regional Ethical Review Board in Uppsala. 1999/313 | Regional Ethical Review Board in Uppsala. And the number of the decision is 2010/432 |
| Y | Umea               | Regional Ethical Review Board in Uppsala. 1990/257 and 1991/33 | Regional Ethical Review Board in Uppsala. 1999/313 | Regional Ethical Review Board in Uppsala. 2010/432                                   |
| Y | Ipswich, UK        | Ipswich District Hospital Ethics Committee                     | Suffolk                                            | NRES committee London-Stanmore REC Ref: 11/LO/0965                                   |
| Y | Norwich, UK        | Norfolk and Norwich Hospital Ethics Committee                  | Norfolk                                            | NRES committee London-Stanmore REC Ref: 11/LO/0965                                   |

|   |                |   |   |                                                             |
|---|----------------|---|---|-------------------------------------------------------------|
| N | Cambridge, UK  | Y | N | N                                                           |
| N | Caerphilly, UK | ? | ? | NRES committee<br>London-Stanmore<br>REC Ref:<br>11/LO/0965 |

For peer review only

## STROBE Statement—checklist of items that should be included in reports of observational studies

|                              | Item No | Recommendation                                                                                                                                                                                                                                                                                                                                                                                                                                                         | Page No  |
|------------------------------|---------|------------------------------------------------------------------------------------------------------------------------------------------------------------------------------------------------------------------------------------------------------------------------------------------------------------------------------------------------------------------------------------------------------------------------------------------------------------------------|----------|
| <b>Title and abstract</b>    | 1       | (a) Indicate the study's design with a commonly used term in the title or the abstract                                                                                                                                                                                                                                                                                                                                                                                 | 1        |
|                              |         | (b) Provide in the abstract an informative and balanced summary of what was done and what was found                                                                                                                                                                                                                                                                                                                                                                    | 3        |
| <b>Introduction</b>          |         |                                                                                                                                                                                                                                                                                                                                                                                                                                                                        |          |
| Background/rationale         | 2       | Explain the scientific background and rationale for the investigation being reported                                                                                                                                                                                                                                                                                                                                                                                   | 5        |
| Objectives                   | 3       | State specific objectives, including any prespecified hypotheses                                                                                                                                                                                                                                                                                                                                                                                                       | 5-6      |
| <b>Methods</b>               |         |                                                                                                                                                                                                                                                                                                                                                                                                                                                                        |          |
| Study design                 | 4       | Present key elements of study design early in the paper                                                                                                                                                                                                                                                                                                                                                                                                                | 6        |
| Setting                      | 5       | Describe the setting, locations, and relevant dates, including periods of recruitment, exposure, follow-up, and data collection                                                                                                                                                                                                                                                                                                                                        | 6-8      |
| Participants                 | 6       | (a) <i>Cohort study</i> —Give the eligibility criteria, and the sources and methods of selection of participants. Describe methods of follow-up<br><i>Case-control study</i> —Give the eligibility criteria, and the sources and methods of case ascertainment and control selection. Give the rationale for the choice of cases and controls<br><i>Cross-sectional study</i> —Give the eligibility criteria, and the sources and methods of selection of participants | 6        |
|                              |         | (b) <i>Cohort study</i> —For matched studies, give matching criteria and number of exposed and unexposed<br><i>Case-control study</i> —For matched studies, give matching criteria and the number of controls per case                                                                                                                                                                                                                                                 | N/A      |
| Variables                    | 7       | Clearly define all outcomes, exposures, predictors, potential confounders, and effect modifiers. Give diagnostic criteria, if applicable                                                                                                                                                                                                                                                                                                                               | 6-8      |
| Data sources/<br>measurement | 8*      | For each variable of interest, give sources of data and details of methods of assessment (measurement). Describe comparability of assessment methods if there is more than one group                                                                                                                                                                                                                                                                                   | 6-8      |
| Bias                         | 9       | Describe any efforts to address potential sources of bias                                                                                                                                                                                                                                                                                                                                                                                                              | 4, 12    |
| Study size                   | 10      | Explain how the study size was arrived at                                                                                                                                                                                                                                                                                                                                                                                                                              | 8, fig 1 |
| Quantitative variables       | 11      | Explain how quantitative variables were handled in the analyses. If applicable, describe which groupings were chosen and why                                                                                                                                                                                                                                                                                                                                           | 7-8      |
| Statistical methods          | 12      | (a) Describe all statistical methods, including those used to control for confounding                                                                                                                                                                                                                                                                                                                                                                                  | 7-8      |
|                              |         | (b) Describe any methods used to examine subgroups and interactions                                                                                                                                                                                                                                                                                                                                                                                                    | 7-8      |
|                              |         | (c) Explain how missing data were addressed                                                                                                                                                                                                                                                                                                                                                                                                                            | 8, fig 1 |
|                              |         | (d) <i>Cohort study</i> —If applicable, explain how loss to follow-up was addressed<br><i>Case-control study</i> —If applicable, explain how matching of cases and controls was addressed<br><i>Cross-sectional study</i> —If applicable, describe analytical methods taking account of sampling strategy                                                                                                                                                              | 8, fig 1 |

1  
2  
3  
4  
5  
6  
7  
8  
9  
10  
11  
12  
13  
14  
15  
16  
17  
18  
19  
20  
21  
22  
23  
24  
25  
26  
27  
28  
29  
30  
31  
32  
33  
34  
35  
36  
37  
38  
39  
40  
41  
42  
43  
44  
45  
46  
47  
48  
49  
50  
51  
52  
53  
54  
55  
56  
57  
58  
59  
60

(e) Describe any sensitivity analyses

Continued on next page

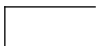

For peer review only



1  
2  
3  
4  
5  
6  
7  
8  
9  
10  
11  
12  
13  
14  
15  
16  
17  
18  
19  
20  
21  
22  
23  
24  
25  
26  
27  
28  
29  
30  
31  
32  
33  
34  
35  
36  
37  
38  
39  
40  
41  
42  
43  
44  
45  
46  
47  
48  
49  
50  
51  
52  
53  
54  
55  
56  
57  
58  
59  
60**Results**

|                  |     |                                                                                                                                                                                                              |                            |
|------------------|-----|--------------------------------------------------------------------------------------------------------------------------------------------------------------------------------------------------------------|----------------------------|
| Participants     | 13* | (a) Report numbers of individuals at each stage of study—eg numbers potentially eligible, examined for eligibility, confirmed eligible, included in the study, completing follow-up, and analysed            | 8, fig 1                   |
|                  |     | (b) Give reasons for non-participation at each stage                                                                                                                                                         | 8, fig 1                   |
|                  |     | (c) Consider use of a flow diagram                                                                                                                                                                           | Fig 1                      |
| Descriptive data | 14* | (a) Give characteristics of study participants (eg demographic, clinical, social) and information on exposures and potential confounders                                                                     | 8                          |
|                  |     | (b) Indicate number of participants with missing data for each variable of interest                                                                                                                          | Table 1                    |
|                  |     | (c) <i>Cohort study</i> —Summarise follow-up time (eg, average and total amount)                                                                                                                             | 6                          |
| Outcome data     | 15* | <i>Cohort study</i> —Report numbers of outcome events or summary measures over time                                                                                                                          | 8-9                        |
|                  |     | <i>Case-control study</i> —Report numbers in each exposure category, or summary measures of exposure                                                                                                         | N/A                        |
|                  |     | <i>Cross-sectional study</i> —Report numbers of outcome events or summary measures                                                                                                                           | N/A                        |
| Main results     | 16  | (a) Give unadjusted estimates and, if applicable, confounder-adjusted estimates and their precision (eg, 95% confidence interval). Make clear which confounders were adjusted for and why they were included | Table 1, 2, 3 and page 8-9 |
|                  |     | (b) Report category boundaries when continuous variables were categorized                                                                                                                                    | See tables and methods     |
|                  |     | (c) If relevant, consider translating estimates of relative risk into absolute risk for a meaningful time period                                                                                             | x                          |
| Other analyses   | 17  | Report other analyses done—eg analyses of subgroups and interactions, and sensitivity analyses                                                                                                               | N/A                        |

**Discussion**

|                  |    |                                                                                                                                                                            |        |
|------------------|----|----------------------------------------------------------------------------------------------------------------------------------------------------------------------------|--------|
| Key results      | 18 | Summarise key results with reference to study objectives                                                                                                                   | 10     |
| Limitations      | 19 | Discuss limitations of the study, taking into account sources of potential bias or imprecision. Discuss both direction and magnitude of any potential bias                 | 4, 12  |
| Interpretation   | 20 | Give a cautious overall interpretation of results considering objectives, limitations, multiplicity of analyses, results from similar studies, and other relevant evidence | 10-12  |
| Generalisability | 21 | Discuss the generalisability (external validity) of the study results                                                                                                      | 10, 12 |

**Other information**

|         |    |                                                                                                                                                               |   |
|---------|----|---------------------------------------------------------------------------------------------------------------------------------------------------------------|---|
| Funding | 22 | Give the source of funding and the role of the funders for the present study and, if applicable, for the original study on which the present article is based | 2 |
|---------|----|---------------------------------------------------------------------------------------------------------------------------------------------------------------|---|

\*Give information separately for cases and controls in case-control studies and, if applicable, for exposed and unexposed groups in cohort and cross-sectional studies.

**Note:** An Explanation and Elaboration article discusses each checklist item and gives methodological background and published examples of transparent reporting. The STROBE checklist is best used in conjunction with this article (freely available on the Web sites of PLoS Medicine at <http://www.plosmedicine.org/>, Annals of Internal Medicine at <http://www.annals.org/>, and Epidemiology at <http://www.epidem.com/>). Information on the STROBE Initiative is available at [www.strobe-statement.org](http://www.strobe-statement.org).

# BMJ Open

## The association of longitudinal physical activity with current symptoms of insomnia, sleep duration and daytime sleepiness - A European population-based study

|                                 |                                                                                                                                                                                                                                                                                                                                                                                                                                                                                                                                                                                                                                                                                                                                                                                                                                                                                                                                                                                                                                                                                                                                                                                                                                                                                                                                                                                                                                                                                                                                                                                                                                                                                                                                                                                                                                                                                                                                                                                                                                                                                                                                         |
|---------------------------------|-----------------------------------------------------------------------------------------------------------------------------------------------------------------------------------------------------------------------------------------------------------------------------------------------------------------------------------------------------------------------------------------------------------------------------------------------------------------------------------------------------------------------------------------------------------------------------------------------------------------------------------------------------------------------------------------------------------------------------------------------------------------------------------------------------------------------------------------------------------------------------------------------------------------------------------------------------------------------------------------------------------------------------------------------------------------------------------------------------------------------------------------------------------------------------------------------------------------------------------------------------------------------------------------------------------------------------------------------------------------------------------------------------------------------------------------------------------------------------------------------------------------------------------------------------------------------------------------------------------------------------------------------------------------------------------------------------------------------------------------------------------------------------------------------------------------------------------------------------------------------------------------------------------------------------------------------------------------------------------------------------------------------------------------------------------------------------------------------------------------------------------------|
| Journal:                        | <i>BMJ Open</i>                                                                                                                                                                                                                                                                                                                                                                                                                                                                                                                                                                                                                                                                                                                                                                                                                                                                                                                                                                                                                                                                                                                                                                                                                                                                                                                                                                                                                                                                                                                                                                                                                                                                                                                                                                                                                                                                                                                                                                                                                                                                                                                         |
| Manuscript ID                   | bmjopen-2022-067197.R1                                                                                                                                                                                                                                                                                                                                                                                                                                                                                                                                                                                                                                                                                                                                                                                                                                                                                                                                                                                                                                                                                                                                                                                                                                                                                                                                                                                                                                                                                                                                                                                                                                                                                                                                                                                                                                                                                                                                                                                                                                                                                                                  |
| Article Type:                   | Original research                                                                                                                                                                                                                                                                                                                                                                                                                                                                                                                                                                                                                                                                                                                                                                                                                                                                                                                                                                                                                                                                                                                                                                                                                                                                                                                                                                                                                                                                                                                                                                                                                                                                                                                                                                                                                                                                                                                                                                                                                                                                                                                       |
| Date Submitted by the Author:   | 29-Jul-2023                                                                                                                                                                                                                                                                                                                                                                                                                                                                                                                                                                                                                                                                                                                                                                                                                                                                                                                                                                                                                                                                                                                                                                                                                                                                                                                                                                                                                                                                                                                                                                                                                                                                                                                                                                                                                                                                                                                                                                                                                                                                                                                             |
| Complete List of Authors:       | <p>Bjornsdottir, Erla; Reykjavik University<br/>         Thorarinsdottir, Elin; Heilsugasla hofuoborgarsvaoisins; University of Iceland, Faculty of medicine<br/>         Lindberg, Eva ; Uppsala University, Department of Medical Sciences: Respiratory, Allergy and Sleep Research<br/>         Benediktsdottir, Bryndis; University of Iceland, Faculty of Medicine; Landspítali háskólasjúkrahús, Department of Sleep<br/>         Franklin, Karl; Umea Universitet, Department of Surgical and Perioperative Sciences<br/>         Jarvis, Debbie; Imperial College London School of Public Health, Population Health and Occupational Disease, National Heart and Lung Institute; Imperial College London, MRC-PHE Centre for Environment and Health<br/>         Demoly, Pascal ; University Hospital of Montpellier, France and Sorbonne Universités, University of Montpellier - Inserm UMR UA11<br/>         Perret, Jennifer; The University of Melbourne Melbourne Medical School<br/>         Garcia Aymerich, Judith; ISGlobal, Centre for Research in Environmental Epidemiology (CREAL); Universitat Pompeu Fabra<br/>         Dorado-Arenas, Sandra; Hospital Galdakao-Usansolo, Pulmonology Department<br/>         Heinrich, Joachim; Ludwig Maximilians University Munich, Institute and Clinic for Occupational, Social and Environmental Medicine; The University of Melbourne Melbourne Medical School, Allergy and Lung Health Unit, Melbourne School of Population and Global Health<br/>         Torén, Kjell; Goteborgs universitet Institutionen for medicin, Occupational and Environmental Medicine<br/>         Garcia Larsen, Vanessa; Johns Hopkins University Bloomberg School of Public Health, 17Program in Human Nutrition, Department of International Health<br/>         Jögi, Rain; Tartu University Hospital, The Lung Clinic<br/>         Gislason, Thorarinn; University of Iceland, Faculty of Medicine; Landspítali háskólasjúkrahús, Department of Sleep<br/>         Janson, Christer; Uppsala University, Department of Medical Sciences: Respiratory, Allergy and Sleep Research</p> |
| <b>Primary Subject Heading</b>: | Epidemiology                                                                                                                                                                                                                                                                                                                                                                                                                                                                                                                                                                                                                                                                                                                                                                                                                                                                                                                                                                                                                                                                                                                                                                                                                                                                                                                                                                                                                                                                                                                                                                                                                                                                                                                                                                                                                                                                                                                                                                                                                                                                                                                            |
| Secondary Subject Heading:      | Global health                                                                                                                                                                                                                                                                                                                                                                                                                                                                                                                                                                                                                                                                                                                                                                                                                                                                                                                                                                                                                                                                                                                                                                                                                                                                                                                                                                                                                                                                                                                                                                                                                                                                                                                                                                                                                                                                                                                                                                                                                                                                                                                           |

1  
2  
3  
4  
5  
6  
7  
8  
9  
10  
11  
12  
13  
14  
15  
16  
17  
18  
19  
20  
21  
22  
23  
24  
25  
26  
27  
28  
29  
30  
31  
32  
33  
34  
35  
36  
37  
38  
39  
40  
41  
42  
43  
44  
45  
46  
47  
48  
49  
50  
51  
52  
53  
54  
55  
56  
57  
58  
59  
60

|           |                                                                            |
|-----------|----------------------------------------------------------------------------|
| Keywords: | SLEEP MEDICINE, EPIDEMIOLOGY, PRIMARY CARE, PUBLIC HEALTH, SPORTS MEDICINE |
|           |                                                                            |

SCHOLARONE™  
Manuscripts

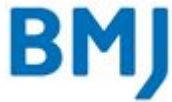

I, the Submitting Author has the right to grant and does grant on behalf of all authors of the Work (as defined in the below author licence), an exclusive licence and/or a non-exclusive licence for contributions from authors who are: i) UK Crown employees; ii) where BMJ has agreed a CC-BY licence shall apply, and/or iii) in accordance with the terms applicable for US Federal Government officers or employees acting as part of their official duties; on a worldwide, perpetual, irrevocable, royalty-free basis to BMJ Publishing Group Ltd ("BMJ") its licensees and where the relevant Journal is co-owned by BMJ to the co-owners of the Journal, to publish the Work in this journal and any other BMJ products and to exploit all rights, as set out in our [licence](#).

The Submitting Author accepts and understands that any supply made under these terms is made by BMJ to the Submitting Author unless you are acting as an employee on behalf of your employer or a postgraduate student of an affiliated institution which is paying any applicable article publishing charge ("APC") for Open Access articles. Where the Submitting Author wishes to make the Work available on an Open Access basis (and intends to pay the relevant APC), the terms of reuse of such Open Access shall be governed by a Creative Commons licence – details of these licences and which [Creative Commons](#) licence will apply to this Work are set out in our licence referred to above.

Other than as permitted in any relevant BMJ Author's Self Archiving Policies, I confirm this Work has not been accepted for publication elsewhere, is not being considered for publication elsewhere and does not duplicate material already published. I confirm all authors consent to publication of this Work and authorise the granting of this licence.

# The association of longitudinal physical activity with current symptoms of insomnia, sleep duration and daytime sleepiness - A European population-based study

Erla Bjornsdottir<sup>1\*</sup>, Elin Helga Thorarinsdottir<sup>2,3\*</sup>, Eva Lindberg<sup>4</sup>, Bryndis Benediktsdottir<sup>3,5</sup>, Karl A Franklin<sup>6</sup>, Deborah L Jarvis<sup>7,8</sup>, Pascal Demoly<sup>9</sup>, Jennifer Perret<sup>10</sup>, Judith Garcia-Aymerich<sup>11,12</sup>, Sandra Dorado-Arenas<sup>13</sup>, Joachim Heinrich<sup>14,15</sup>, Kjell Toren<sup>16</sup>, Vanessa Garcia Larsen<sup>17</sup>, Rain Jogi<sup>18</sup> Thorarinn Gislason<sup>3,5\*\*</sup>, Christer Janson<sup>4\*\*</sup>

\*Co-first authors, \*\* Co-senior author

## Affiliations:

<sup>1</sup> University of Reykjavik, Iceland

<sup>2</sup> Primary Health Care of the Capital Area, Reykjavik, Iceland

<sup>3</sup> Faculty of Medicine, University of Iceland, Reykjavik, Iceland

<sup>4</sup> Department of Medical Sciences: Respiratory, Allergy and Sleep Research, Uppsala University, Uppsala, Sweden

<sup>5</sup> Department of Sleep, Landspítali - The National University Hospital of Iceland, Reykjavik, Iceland.

<sup>6</sup> Department of Surgical and Perioperative Sciences, Surgery, Umeå University, Umeå, Sweden

<sup>7</sup> Population Health and Occupational Disease, National Heart and Lung Institute, Imperial College London, London, UK

<sup>8</sup> MRC-PHE Centre for Environment and Health, Imperial College London, London, UK

<sup>9</sup> University Hospital of Montpellier, Montpellier, France and IDESP, University of Montpellier - Inserm UMR UA11

<sup>10</sup> University of Melbourne, Melbourne, Victoria, Australia.

<sup>11</sup> ISGlobal, Centre for Research in Environmental Epidemiology (CREAL), Barcelona, Spain

<sup>12</sup> Universitat Pompeu Fabra (UPF), Barcelona, Spain

<sup>13</sup> Pulmonology Department, Galdakao-Usansolo Hospital, OSI Barrualde-Galdakao (Osakidetza), Biscay, Spain

<sup>14</sup> Institute and Clinic for Occupational, Social and Environmental Medicine, University Hospital, LMU Munich, Comprehensive Pneumology Center (CPC-M) Munich, German Center for Lung Research (DZL)

<sup>15</sup> Allergy and Lung Health Unit, Melbourne School of Population and Global Health, The University of Melbourne, Melbourne, Australia

<sup>16</sup> Department of Occupational and Environmental Medicine, Institute of Medicine, Sahlgrenska Academy, University of Gothenburg, Gothenburg, Sweden

<sup>17</sup> Program in Human Nutrition, Department of International Health, The Johns Hopkins Bloomberg School of Public Health, Baltimore, USA.

<sup>18</sup> The Lung Clinic, Tartu University Hospital, Tartu, Estonia.

Correspondant author:

Erla Bjornsdottir

[erlabjo@gmail.com](mailto:erlabjo@gmail.com)

00354-8608009

**Abstract:**

*Objectives:* To explore the relationship of physical activity during the past 10 years with insomnia, daytime sleepiness and estimated short or long sleep duration among adults aged 39–67 years.

*Design:* Population-based, multi-centre cohort study.

*Setting:* 21 centres in 9 European countries.

*Methods:* Included were 4339 participants in the third follow-up of the European Community Respiratory Health Survey (ECRHS III) who answered questions on physical activity at baseline (ECRHS II) and questions on physical activity, insomnia symptoms, sleep duration and daytime sleepiness at follow up (ECRHS III). Physical activity was assessed both in ECRHS III and 10 years before. Participants reported that they exercised with a frequency of at least two or more times a week for one hour a week or more were classified as being physically active. Change in activity status was categorised into four groups: persistently non-active, became inactive, became active and persistently active.

*Main outcome measures:* Insomnia, sleep time and daytime sleepiness in relation to physical activity.

*Results:* Altogether, 37% of participants were persistently non-active, 25% were persistently active, 20% became inactive and 18% became active from baseline to follow up. Participants that were persistently active were less likely to report difficulties initiating sleep (OR 0.60 (95% CI 0.45-0.78)), short sleep duration of  $\leq 6$  h/night (OR 0.71 (95% CI 0.59-0.85) and long sleep of ( $\geq 9$  h/night (OR 0.53 (95% CI 0.33-0.84)) than persistently non active subjects after adjusting for age, sex, BMI, smoking history, and study centre. Daytime sleepiness and difficulties maintaining sleep were not related to physical activity.

*Conclusion:* Physically active people have a lower risk of some insomnia symptoms and extreme sleep duration, both long and short.

**Strengths and limitations of this study:**

- The longitudinal study design, with the exposure (physical activity) measured 10 years before the outcome (sleep outcomes) allows testing the directionality of the association.
- Data was collected using standardized and validated procedures and instruments, increasing internal validity.
- Data was obtained from 9 European countries, increasing external validity of our findings.
- One limitation of our study is that sleep variables are only available at the follow-up, precluding testing their role on baseline physical activity.
- Insomnia symptoms, sleep length and daytime sleepiness were obtained from questionnaire and no sleep disorder diagnoses from medical providers or objective assessments were available.

## Introduction

Disturbed sleep is common in the general population and impacts health and quality of life.(1-3) Chronic sleep disturbances are associated with cardiovascular disease, metabolic dysfunction, psychiatric disorders, and increased mortality.(4-6)

Physical activity and sleep: Regular exercise is associated with better health and several studies suggest that physical activity (PA) is beneficial on sleep and may improve symptoms of chronic insomnia.(7-10) It is, however, unclear how large these benefits are and which factors moderate these benefits.(11) The positive association between PA and sleep might be subject to multiple moderating factors such as gender, age, BMI, fitness level, general health and the characteristics of the exercise. Therefore, sleep and PA probably influence each other through complex, reciprocal interactions including multiple physiological and psychological pathways.(7)

Physical activity and daytime sleepiness: There is evidence that more PA is associated with less daytime sleepiness.(12-17) Cross-sectional studies have shown that low PA is associated with increased likelihood of excessive daytime sleepiness (EDS)(14-16) and that subjects participating in exercise are less likely to have EDS.(12, 17) In older adults, increasing PA by doing home exercises has been shown to improve EDS and reduce the prevalence of insomnia symptoms(13) and another study showed that increasing PA protected women from future insomnia.(18) Other studies have contradictory findings. In an epidemiological study of 4.405 Koreans, daytime sleepiness was more common among those in the top quartile of PA compared to those in the lowest quartile group.(19) Among patients with obstructive sleep apnoea increased PA was associated with lower disease severity and 28% decrease in EDS.(20) The daily association between PA and sleep duration was described in 2021 based on a systemic review and meta-analysis on 33 peer-reviewed papers showing that the night following an increased PA there was a lower total sleep time.(21)

Limitations of previous studies: There is a lack of epidemiological data from long-term follow-up of large cohorts studying the association of PA to sleep length, daytime sleepiness, and insomnia symptoms. Previous research on physical activity and



1  
2  
3 sleep-related outcomes has several important limitations. Most studies are cross-  
4 sectional or with a short follow-up, preventing to elucidate if increased physical  
5 activity improves sleeping outcomes or reduced physical activity is a consequence of  
6 sleep problems. Finally, the effect of physical activity on sleep length, daytime  
7 sleepiness, and insomnia symptoms has not been studied simultaneously.  
8  
9  
10  
11  
12

13 Aims of the current study: Therefore, the aim of the present study was to assess the  
14 interrelationship between physical activity based on frequency, duration and intensity  
15 and symptoms of insomnia, self-reported sleep duration and daytime sleepiness  
16 among middle-aged subjects from 21 centres in 9 countries at two time periods  
17 10 years apart, giving important longitudinal follow up data.  
18  
19  
20  
21  
22

## 23 **Material and methods**

### 24 *Subjects:*

25 We studied participants in the second and third follow-up of the European Community  
26 Respiratory Health Survey (ECRHS II and III, [www.ecrhs.org](http://www.ecrhs.org) ), an international,  
27 population-based, multicentre cohort study of asthma and allergy, which was first  
28 performed in 1990. Detailed descriptions of the methods for ECRHS I and ECRHS II  
29 have been published elsewhere.(22, 23) Briefly, participating centres first randomly  
30 selected samples of 20 to 44-year-old subjects in order to follow them for the asthma,  
31 allergy and lung diseases (See: [www.ecrhs.org](http://www.ecrhs.org)). Participants completed a short  
32 postal questionnaire about asthma and asthma-like symptoms and from those who  
33 responded, a random sample was selected to undergo a more detailed clinical  
34 examination. In ECRHS II, subjects who had participated in the clinical phase of  
35 ECRHS I (performed between 1991 – 1994) were invited to participate in follow-up.  
36 The clinical phase of ECRHS II was performed between 1998 to 2002. ECRHS III is  
37 the second follow-up and was performed from February 2011 to January 2014.(22-  
38 24) The present study is based on data from ECRHS II and III (see figure 1 for  
39 flowchart). Ethical approval for the study from local research ethics committees and  
40 written consent from participants were obtained.  
41  
42  
43  
44  
45  
46  
47  
48  
49  
50  
51  
52  
53  
54  
55

### 56 *Health, habits, and measurements*

57  
58 Subjects answered the core ECRHS questionnaires which included questions  
59 on lifestyle, respiratory symptoms, smoking history, and general health. Current  
60

1  
2  
3 smokers were defined as those who smoked tobacco regularly during the last month.  
4 Former smokers were defined as smokers who denied having smoked regularly for a  
5 month prior to the examination. Those who reported no regular smoking at or prior to  
6 the examination were defined as never smokers. Height and weight were measured,  
7 and body mass index (BMI) was calculated.(24)  
8  
9  
10  
11  
12

### 13 *Assessment of physical activity*

14  
15 Physical activity was assessed in ECRHS II and III using replies from questionnaire  
16 in ECRHS II and III. The assessment of PA in ECRHS has previously been described  
17 in details and how both frequency and duration of PA was used to divide the  
18 population into categories.(22) In brief, participants were asked how often and for  
19 how many hours per week they usually exercised so that they got out of breath or  
20 became sweaty. Participants who exercised two or more times a week during at least  
21 1 hour a week were classified physically active. Change in activity status from  
22 baseline to follow up was categorised into four PA groups: persistently non-active  
23 (non-active at both baseline and follow up), became inactive (active at baseline and  
24 non-active at follow up), became active (non-active at baseline and active at follow  
25 up) and persistently active (active at both baseline and follow up).  
26  
27  
28  
29  
30  
31  
32  
33  
34  
35

### 36 *Sleep questionnaires and measurements*

37 Sleep-related symptoms were assessed by using the Basic Nordic Sleep  
38 Questionnaire(25), where participants were asked about frequency of insomnia  
39 symptoms. Answers were on a scale of 1 – 5: (1) never or very seldom, (2) less than  
40 once a week, (3) once to twice a week, (4) three to five times a week, (5) every day  
41 or almost every day of the week. Insomnia symptoms were defined using answers to  
42 three questions from the Basic Nordic Sleep Questionnaire “I have difficulties falling  
43 asleep at night” (difficulties initiating sleep), “I wake up often during the night”  
44 (difficulties maintaining sleep) and “I wake up early in the morning and can’t fall back  
45 asleep” (early morning awakenings). Those who reported those symptoms of  
46 insomnia  $\geq 3$  times a week (scores 4 and 5) were considered to have the  
47 corresponding insomnia subtype. Daytime sleepiness was evaluated using the  
48 Epworth Sleepiness Scale, a brief questionnaire that measures daytime sleepiness  
49 based on the likelihood of falling asleep in eight different situations.(26) Participants  
50 with Epworth sleepiness scale score  $>10$  were considered to have EDS. Participants  
51  
52  
53  
54  
55  
56  
57  
58  
59  
60

1  
2  
3 answered the question: how much sleep do you estimate that you get on average  
4 each night? They were classified as short sleepers ( $\leq 6$  hours/night), normal sleepers  
5 (6–9 hours/night) and long sleepers ( $\geq 9$  hours/night) according to their answers.  
6  
7  
8

### 9 10 *Patient and public involvement*

11 The study's design did not involve patients or the general public. However, all  
12 participating patients were informed about the research objectives, and their informed  
13 consent was obtained. The survey was completed by participants voluntarily and no  
14 input from patients was sought in interpreting or writing up the results. The results of  
15 the research will not be disseminated to the patients.  
16  
17  
18  
19  
20  
21

### 22 *Statistical analysis*

23 Data are presented as number and percentage or mean  $\pm$ SD, depending on  
24 distribution. For bivariate analysis, the  $\chi^2$  test and one-way analysis of variance were  
25 used for nominal and continuous variables. Logistic regression was used for  
26 multivariable analyses to estimate the association between physical activity and  
27 sleep related outcomes. The model was adjusted for potential confounders including  
28 age, sex, BMI, smoking history and study center. In the analysis, all variables,  
29 including study center (n=21), were treated as fixed effects. STATA V.16 was used  
30 for all statistical analyses.  
31  
32  
33  
34  
35  
36  
37  
38

## 39 **Results**

### 40 *Participants and level of physical activity*

41 From a total of 5.850 participants in ECRHS II, we excluded those with missing data  
42 and included a total of 4.339 participants (48% men), see Figure 1. From baseline to  
43 10 years later, 36.9% of participants were persistently non-active, 17.9% became  
44 physically active at follow-up, 20.3% of participants became inactive 24.9% were  
45 persistently active (Table 1). There were geographical differences in the level of  
46 physical activity between the ECRHS countries (Figure 2). Participants in Norway  
47 were most likely to be persistently active, while participants in Spain, followed by  
48 Estonia, were most likely to be persistently non-active (Figure 2).  
49  
50  
51  
52  
53  
54  
55  
56  
57

### 58 *General characteristics and health*

1  
2  
3 Persistently active participants were more often men, they were younger, and they  
4 had slightly lower BMI (Table 1). They were also less likely to be current smokers  
5 and more likely to be currently working (Table 1).  
6  
7  
8

### 9 10 *Insomnia symptoms*

11 In unadjusted analysis, there was a significant difference in reporting difficulties  
12 initiating sleep, early morning awakenings and any insomnia symptom where those  
13 persistently active were least likely to report these symptoms. Also, persistently  
14 active subjects were the least likely to report two and three insomnia symptoms  
15 (Table 2). After adjusting for age, sex, BMI, smoking history and study centre, this  
16 negative association remained for difficulties initiating sleep (OR 0.58 (0.42-0.77)),  
17 any insomnia symptom (OR 0.78 (0.65-0.94) and reporting two (OR 0.60 (0.43-0.82))  
18 and three (OR 0.63 (0.41-0.98) insomnia symptoms (Table 3). Additionally, in  
19 adjusted analysis, persistently active subjects were significantly less likely to report  
20 difficulties initiating sleep (OR 0.80 (0.66-0.97) (Table 3). There were also  
21 independent associations between insomnia symptoms and age, female gender and  
22 BMI (Table 4).  
23  
24  
25  
26  
27  
28  
29  
30  
31  
32  
33

### 34 *Sleep duration and daytime sleepiness*

35 In unadjusted analysis, there was a significant difference in short and long sleep  
36 duration between levels of activity. Those who were persistently active were most  
37 likely to be normal sleepers and the persistently non-active were least likely (70.9%  
38 vs. 59.2% respectively) (Table 2). After adjusting for age, sex, BMI, smoking history  
39 and study centre, these results remained significant for persistently active subjects.  
40 They were significantly more likely to be normal sleepers (OR 1.55 (1.29-1.87)) and  
41 significantly less likely to be short sleepers (OR 0.71 (0.58-0.85)) or long sleepers  
42 (OR 0.48 (0.28-0.80)) (Table 3). Additionally, those who became active were more  
43 likely to be normal sleepers than those persistently non-active (OR 1.21 (1.00-1.47))  
44 (Table 3).  
45  
46  
47  
48  
49  
50  
51

52 However, there was not a significant association between the mean Epworth  
53 sleepiness scale score or percentage with Epworth sleepiness scale score >10 and  
54 level of physical activity (Tables 2 and 3). Daytime sleepiness was also  
55 independently associated with smoking (Table 4).  
56  
57  
58  
59  
60

## Discussion

The main results of this study were that participants who reported being physically active at the start and end of a 10 year follow up period were less likely to report insomnia symptoms at the follow-up. We also found that subjects that are persistently active are more likely to sleep the recommended 6-9 hours. This association remained statistically significant after adjusting for sex, age, smoking history, and BMI. We also saw that persistently active participants were more often men, they were younger, and they had slightly lower BMI and were less likely to be current smokers and more likely to be currently working.

Our results are in line with previous studies that have shown a beneficial effect of physical activity on symptoms of insomnia (9, 10) but the current study additionally shows the importance of consistency in exercise over time because the association was lost in initially active subjects who became inactive. A recent meta-analysis examining the effects of acute and regular exercise on a range of sleep variables showed that acute exercise (less than one week of exercise) has a small beneficial effect on many objective measures of sleep such as total sleep time, symptoms of insomnia and sleep quality.(7) Furthermore, this meta-analysis found greater benefits for regular exercise on both subjective and objective sleep parameters over time. Regular exercise had small beneficial effects on total sleep time and sleep efficiency, small-to-medium beneficial effects on sleep onset latency, and moderate beneficial effects on sleep quality.(7)

There are two recent systematic reviews and meta-analysis on the effects of PA on sleep(7) and insomnia(9) both substantially reviewing the same randomized controlled studies. Banno *et al.* included nine studies with a total of 557 participants.(7) The majority of participants exercised 3 times or less per week and follow-up was 4 months or shorter in all studies except one. Their conclusion was that exercise could improve sleep, but higher quality research was needed.(7) Five studies on insomnia and additionally six on insomnia symptoms showed shorter sleep latency and higher sleep efficacy, but the authors also acknowledged the small size of the literature and severe methodological limitations often based on selection bias.(9) Most previous studies are also cross-sectional which can also be considered a limitation.

1  
2  
3 Furthermore, a recent systematic review on physical activity and sleep showed that  
4 moderate exercise had more promising outcome on sleep quality than vigorous  
5 exercise. It is therefore important to further study the impact of the intensity of  
6 physical activity in the context of age and gender when exploring the beneficial  
7 impact on sleep.(27)  
8  
9  
10  
11  
12

13 This study has a long follow up period (10 years) and indicates strongly that  
14 consistency in physically activity might be an important factor to optimize sleep  
15 duration and reduce symptoms of insomnia. Most other studies have had a much  
16 shorter follow up period(7) which makes it more difficult to assess consistency in  
17 activity over time.  
18  
19  
20  
21

22 Our results indicate that those who are consistent in physical activity are also less  
23 likely to be both short (<6h) and long sleepers (>9h). Those who are physically active  
24 in general are also more likely to engage in a healthier lifestyle (28) which also can  
25 have an effect on sleep. Lifestyle factors such as healthy diet and physical activity  
26 are probably a part of a phenotype that characterizes those individuals who are  
27 generally engaged in a healthy lifestyle. A recent review highlighted the importance  
28 of focusing on the combination of sleep, diet and exercise when exploring healthy  
29 longevity.(29)  
30  
31  
32  
33  
34  
35  
36  
37

38 The three groups reporting low physical activity in either ECRHS survey or at both  
39 time points are all reporting very similar prevalence of insomnia symptoms, extreme  
40 sleep length and daytime sleepiness. This is somewhat surprising, especially that  
41 those who are active at the follow-up but were not at baseline do have very similar  
42 symptom profile as those who were inactive at both surveys. Our study found a  
43 consistency in a behaviour like physical activity for more than a decade is strongly  
44 related to less insomnia and more “normal” sleep length. The important information  
45 concerning “the healthy phenotype” would be missed if the physical activity data were  
46 available only at baseline or at follow-up but not at both time points.  
47  
48  
49  
50  
51  
52  
53  
54

55 In a recent review based on 22 randomized controlled trials on the effects of regular  
56 exercise (lasting at least 2 months on a regular basis) on self-reported sleep quality,  
57 insomnia and daytime sleepiness, it was found that regular physical activity improved  
58 subjective sleep quality, insomnia severity, and daytime sleepiness as measured only  
59  
60

1  
2  
3 with the Epworth sleepiness scale.(27) These results regarding insomnia symptoms  
4 are in line with our study but the results on daytime sleepiness differ from our results.  
5 The reason for this discrepancy could be due to different study populations since  
6 there were only two studies in this review that measured daytime sleepiness using  
7 the Epworth sleepiness scale, one study assessed this among the elderly, 60 years  
8 and older(13) and the other among overweight and obese men.(30) Another recent  
9 review of 32 randomized control trials on the effects of exercise on improving sleep  
10 disturbances showed that exercise is beneficial in improving sleep quality, symptoms  
11 of insomnia, restless legs, sleep apnoea and daytime sleepiness. However, exercise  
12 only had significant effects on sleepiness if it had lasted for more than 12 weeks  
13 while the exercise period did not matter in regards of the association to sleep quality  
14 and insomnia symptoms.(31)

15  
16  
17  
18  
19  
20  
21  
22  
23  
24  
25  
26  
27  
28  
29  
30  
31  
32  
33  
34  
35  
36  
37  
38  
39  
40  
41  
42  
43  
44  
45  
46  
47  
48  
49  
50  
51  
52  
53  
54  
55  
56  
57  
58  
59  
60  
Another recent study showed that high or increasing levels of physical activity could  
protect women from future insomnia.(18) Therefore, exercise seems to have a  
stronger association with sleep quality and insomnia than with sleepiness, which is in  
line with our results. However almost all previous studies, have the limitation that the  
definition of sleepiness is limited to the estimate the likelihood of falling asleep but  
not the general feeling of sleepiness, that we have shown is also an important part of  
sleepiness.(32, 33) Another recent review exploring the associations of exercise,  
sleep and cognitive function among older adults showed that physical activity is  
associated with improved cognitive function but the association of sleep and  
cognitive function seems to be U-shaped, as too much or too little sleep is negatively  
associated with cognitive function.(34) We did not explore cognitive function in the  
current study but It would be interesting for future studies to explore further how  
cognitive function is affected by the association of physical activity and sleep.

This study has several strengths such as the population-based nature, the  
longitudinal study design and the large sample collected in the same manner at many  
centres in 9 different countries. Another strength is the use of standardized and  
validated procedures and instruments. The long follow up period is also a strength  
since data on physical activity is collected ten years apart and subjects are  
categorized according to change in physical activity. This study is however not  
without limitations. It is not possible to know whether those who are active at both  
timepoints have been continuously physically active throughout the study period or

1  
2  
3 only at these two timepoints. Furthermore, physical activity was only measured using  
4 a questionnaire. Another limitation of our study is that sleep variables are only  
5 available at the follow-up, and we only have information on insomnia symptoms but  
6 not the diagnosis of insomnia disorder. Sleep length and daytime sleepiness are also  
7 based on subjective data. Therefore, even though the measurement of physical  
8 activity is longitudinal, it may not be entirely appropriate to describe the associations  
9 between physical activity and sleep outcomes as longitudinal. Also, there are  
10 potential implications of residual confounders that can influence both physical activity  
11 and sleep which were not explored in the current study (e.g. mental health,  
12 musculoskeletal disorders/ chronic pain) which could influence the study findings.  
13  
14  
15  
16  
17  
18  
19

20  
21  
22 In conclusion, physical activity over time is associated with lower prevalence of  
23 insomnia symptoms and with sleeping between 6-9 hours per night.  
24  
25

26  
27 **Contributors:** EHT and EB are the co-first authors of the paper and they equally  
28 drafted, participated in manuscript preparation and were responsible for  
29 communications with other co-authors. TG and CJ participated in the design of the  
30 study, in the manuscript preparation and in review of the manuscript on several  
31 stages. EHT performed the statistical analysis with help from CJ. Eva Lindberg,  
32 Bryndis Benediktsdottir, Karl A Franklin, Deborah L Jarvis, Pascal Demoly, Jennifer  
33 Perret, Judith Garcia-Aymerich, Sandra Dorado-Arenas, Joachim Heinrich, Kjell  
34 Toren, Vanessa Garcia Larsen and Rain Jogi participated in data collection and/or in  
35 reviewing of the paper.  
36  
37  
38  
39  
40  
41  
42  
43

44 **Competing interests:** None declared  
45  
46

47  
48 **Funding: Financial Support for ECRHS III: Australia:** National Health & Medical  
49 Research Council, **Belgium: Antwerp South, Antwerp City:** Research Foundation  
50 Flanders (FWO), grant code G.0.410.08.N.10 (both sites), **Estonia: Tartu-**  
51 **SF0180060s09** from the Estonian Ministry of Education. **France: (All)** Ministère de la  
52 Santé. Programme Hospitalier de Recherche Clinique (PHRC) national 2010.  
53 **Bordeaux:** INSERM U897 Université Bordeaux segalen, **Grenoble:** Comité  
54 Scientifique AGIRadom 2011. **Paris:** Agence Nationale de la Santé, Région Ile de  
55 France, domaine d'intérêt majeur (DIM) **Germany : Erfurt:** German Research  
56  
57  
58  
59  
60



1  
2  
3 Foundation HE 3294/10-1 **Hamburg**: German Research Foundation MA 711/6-1, NO  
4 262/7-1 **Iceland**: Reykjavik, The Landspítali University Hospital Research Fund,  
5 University of Iceland Research Fund, The Icelandic Collage of Family Physicians  
6 research found, ResMed Foundation, California, USA, Orkuveita Reykjavíkur  
7 (Geothermal plant), Vegagerðin (The Icelandic Road Administration (ICERA). The  
8 Icelandic Research found - grant no 173701-052 **Italy**: All Italian centres were  
9 funded by the Italian Ministry of Health, Chiesi Farmaceutici SpA, in addition **Verona**  
10 was funded by Cariverona foundation, Education Ministry (MIUR).

11  
12  
13  
14  
15  
16  
17 **Norway**: Norwegian Research council grant no 214123, Western Norway Regional  
18 Health Authorities grant no 911631, Bergen Medical Research Foundation. **Spain**:  
19 Fondo de Investigación Sanitaria (PS09/02457, PS09/00716 09/01511) PS09/02185  
20 PS09/03190), Servicio Andaluz de Salud , Sociedad Española de Neumología y  
21 Cirugía Torácica (SEPAR 1001/2010); **Sweden**: All centres were funded by The  
22 Swedish Heart and Lung Foundation, The Swedish Asthma and Allergy Association,  
23 The Swedish Association against Lung and Heart Disease. Fondo de Investigación  
24 Sanitaria (PS09/02457 **Barcelona**: Fondo de Investigación Sanitaria (FIS  
25 PS09/00716) **Galdakao**: Fondo de Investigación Sanitaria (FIS 09/01511) **Huelva**:  
26 Fondo de Investigación Sanitaria (FIS PS09/02185) and Servicio Andaluz de Salud  
27 **Oviedo**: Fondo de Investigación Sanitaria (FIS PS09/03190) **Sweden**: All centres  
28 were funded by The Swedish Heart and Lung Foundation, The Swedish Asthma and  
29 Allergy Association, The Swedish Association against Lung and Heart Disease.

#### 30 **Swedish Research Council for health, working life and welfare (FORTE)**

31 **Göteborg** : Also received further funding from the Swedish Council for Working life  
32 and Social Research. Umea also received funding from Vasterbotten Country Council  
33 ALF grant. **Switzerland**: The Swiss National Science Foundation (grants no  
34 33CSCO-134276/1, 33CSCO-108796, 3247BO-104283, 3247BO-104288, 3247BO-  
35 104284, 3247-065896, 3100-059302, 3200-052720, 3200-042532, 4026-028099)  
36 The Federal office for forest, environment and landscape, The Federal Office of  
37 Public Health, The Federal Office of Roads and Transport, the canton's government  
38 of Aargau, Basel-Stadt, Basel-Land, Geneva, Luzern, Ticino, Valais and Zürich, the  
39 Swiss Lung League, the canton's Lung League of Basel Stadt/ Basel, Landschaft,  
40 Geneva, Ticino, Valais and Zurich, SUVA, Freiwillige Akademische Gesellschaft,  
41 UBS Wealth Foundation, Talecris Biotherapeutics GmbH, Abbott Diagnostics,  
42  
43  
44  
45  
46  
47  
48  
49  
50  
51  
52  
53  
54  
55  
56  
57  
58  
59  
60

1  
2  
3 European Commission 018996 (GABRIEL), Wellcome Trust WT 084703MA, **UK:**  
4 Medical Research Council (Grant Number 92091). Support also provided by the  
5 National Institute for Health Research through the Primary Care Research Network  
6  
7  
8  
9

10 **Data sharing statement:** Data are available on reasonable request. The data that  
11 supports the findings of this study are available on request from the corresponding  
12 author.  
13  
14  
15

16 **Ethics approval statement:** Ethical approval for the study from the local research  
17 ethics committees and written consent from participants were obtained at each site.  
18  
19  
20  
21  
22

## 23 References

- 24 1. Benca RM. Diagnosis and treatment of chronic insomnia: a review. *Psychiatr Serv.* 2005;56(3):332-43.
- 25 2. Gottlieb DJ, Redline S, Nieto FJ, Baldwin CM, Newman AB, Resnick HE, et al. Association of usual sleep duration with hypertension: the Sleep Heart Health Study. *Sleep.* 2006;29(8):1009-14.
- 26 3. Sivertsen B, Lallukka T, Salo P, Pallesen S, Hysing M, Krokstad S, et al. Insomnia as a risk factor for ill health: results from the large population-based prospective HUNT Study in Norway. *J Sleep Res.* 2014;23(2):124-32.
- 27 4. Gangwisch JE, Heymsfield SB, Boden-Albala B, Buijs RM, Kreier F, Pickering TG, et al. Short sleep duration as a risk factor for hypertension: analyses of the first National Health and Nutrition Examination Survey. *Hypertension.* 2006;47(5):833-9.
- 28 5. Luyster FS, Strollo PJ, Jr., Zee PC, Walsh JK, Boards of Directors of the American Academy of Sleep M, the Sleep Research S. Sleep: a health imperative. *Sleep.* 2012;35(6):727-34.
- 29 6. Taheri S. The link between short sleep duration and obesity: we should recommend more sleep to prevent obesity. *Arch Dis Child.* 2006;91(11):881-4.
- 30 7. Banno M, Harada Y, Taniguchi M, Tobita R, Tsujimoto H, Tsujimoto Y, et al. Exercise can improve sleep quality: a systematic review and meta-analysis. *PeerJ.* 2018;6:e5172.
- 31 8. Kredlow MA, Capozzoli MC, Hearon BA, Calkins AW, Otto MW. The effects of physical activity on sleep: a meta-analytic review. *J Behav Med.* 2015;38(3):427-49.
- 32 9. Lowe H, Haddock G, Mulligan LD, Gregg L, Fuzellier-Hart A, Carter LA, et al. Does exercise improve sleep for adults with insomnia? A systematic review with quality appraisal. *Clin Psychol Rev.* 2019;68:1-12.
- 33 10. Passos GS, Poyares D, Santana MG, Garbuio SA, Tufik S, Mello MT. Effect of acute physical exercise on patients with chronic primary insomnia. *J Clin Sleep Med.* 2010;6(3):270-5.
- 34 11. Kelley GA, Kelley KS. Exercise and sleep: a systematic review of previous meta-analyses. *J Evid Based Med.* 2017;10(1):26-36.
- 35 12. Andrianasolo RM, Menai M, Galan P, Hercberg S, Oppert JM, Kesse-Guyot E, et al. Leisure-Time Physical Activity and Sedentary Behavior and Their Cross-Sectional Associations with Excessive Daytime Sleepiness in the French SU.VI.MAX-2 Study. *Int J Behav Med.* 2016;23(2):143-52.
- 36 13. Brandao GS, Gomes G, Brandao GS, Callou Sampaio AA, Donner CF, Oliveira LVF, et al. Home exercise improves the quality of sleep and daytime sleepiness of elderlies: a randomized controlled trial. *Multidiscip Respir Med.* 2018;13:2.
- 37  
38  
39  
40  
41  
42  
43  
44  
45  
46  
47  
48  
49  
50  
51  
52  
53  
54  
55  
56  
57  
58  
59  
60

14. Chasens ER, Sereika SM, Weaver TE, Umlauf MG. Daytime sleepiness, exercise, and physical function in older adults. *J Sleep Res.* 2007;16(1):60-5.
15. Hays JC, Blazer DG, Foley DJ. Risk of napping: excessive daytime sleepiness and mortality in an older community population. *J Am Geriatr Soc.* 1996;44(6):693-8.
16. McClain JJ, Lewin DS, Laposky AD, Kahle L, Berrigan D. Associations between physical activity, sedentary time, sleep duration and daytime sleepiness in US adults. *Prev Med.* 2014;66:68-73.
17. Vuori I, Urponen H, Hasan J, Partinen M. Epidemiology of exercise effects on sleep. *Acta Physiol Scand Suppl.* 1988;574:3-7.
18. Sporndly-Nees S, Asenlof P, Lindberg E. High or increasing levels of physical activity protect women from future insomnia. *Sleep Med.* 2017;32:22-7.
19. Joo S, Baik I, Yi H, Jung K, Kim J, Shin C. Prevalence of excessive daytime sleepiness and associated factors in the adult population of Korea. *Sleep Med.* 2009;10(2):182-8.
20. Iftikhar IH, Kline CE, Youngstedt SD. Effects of exercise training on sleep apnea: a meta-analysis. *Lung.* 2014;192(1):175-84.
21. Atoui S, Chevance G, Romain AJ, Kingsbury C, Lachance JP, Bernard P. Daily associations between sleep and physical activity: A systematic review and meta-analysis. *Sleep Med Rev.* 2021;57:101426.
22. Fuertes E, Carsin AE, Anto JM, Bono R, Corsico AG, Demoly P, et al. Leisure-time vigorous physical activity is associated with better lung function: the prospective ECRHS study. *Thorax.* 2018;73(4):376-84.
23. Janson C, Anto J, Burney P, Chinn S, de Marco R, Heinrich J, et al. The European Community Respiratory Health Survey: what are the main results so far? European Community Respiratory Health Survey II. *Eur Respir J.* 2001;18(3):598-611.
24. Bjornsdottir E, Janson C, Lindberg E, Arnardottir ES, Benediktsdottir B, Garcia-Aymerich J, et al. Respiratory symptoms are more common among short sleepers independent of obesity. *BMJ Open Respir Res.* 2017;4(1):e000206.
25. Partinen M, Gislason T. Basic Nordic Sleep Questionnaire (BNSQ): a quantitated measure of subjective sleep complaints. *J Sleep Res.* 1995;4(S1):150-5.
26. Johns MW. A new method for measuring daytime sleepiness: the Epworth sleepiness scale. *Sleep.* 1991;14(6):540-5.
27. Xie Y, Liu S, Chen XJ, Yu HH, Yang Y, Wang W. Effects of Exercise on Sleep Quality and Insomnia in Adults: A Systematic Review and Meta-Analysis of Randomized Controlled Trials. *Front Psychiatry.* 2021;12:664499.
28. Cobb-Clark DA, Kassenboehmer, S. C., & Schurer, S. Healthy habits: The connection between diet, exercise, and locus of control. *Journal of Economic Behavior & Organization.* 2014;98:1-28.
29. Min S, Masanovic B, Bu T, Matic RM, Vasiljevic I, Vukotic M, et al. The Association Between Regular Physical Exercise, Sleep Patterns, Fasting, and Autophagy for Healthy Longevity and Well-Being: A Narrative Review. *Front Psychol.* 2021;12:803421.
30. Tan X, Alen M, Wiklund P, Partinen M, Cheng S. Effects of aerobic exercise on home-based sleep among overweight and obese men with chronic insomnia symptoms: a randomized controlled trial. *Sleep Med.* 2016;25:113-21.
31. Amiri S, Hasani J, Satkin M. Effect of exercise training on improving sleep disturbances: a systematic review and meta-analysis of randomized control trials. *Sleep Med.* 2021;84:205-18.
32. Mazzotti DR, Keenan BT, Thorarinsdottir EH, Gislason T, Pack AI, Sleep Apnea Global Interdisciplinary C. Is the Epworth Sleepiness Scale Sufficient to Identify the Excessively Sleepy Subtype of OSA? *Chest.* 2022;161(2):557-61.
33. Thorarinsdottir EH, Bjornsdottir E, Benediktsdottir B, Janson C, Gislason T, Aspelund T, et al. Definition of excessive daytime sleepiness in the general population: Feeling sleepy relates better to sleep-related symptoms and quality of life than the Epworth Sleepiness Scale score. Results from an epidemiological study. *J Sleep Res.* 2019;28(6):e12852.

1  
2  
3 34. Mellow ML, Crozier AJ, Dumuid D, Wade AT, Goldsworthy MR, Dorrian J, et al. How are  
4 combinations of physical activity, sedentary behaviour and sleep related to cognitive function in  
5 older adults? A systematic review. *Exp Gerontol.* 2022;159:111698.  
6  
7  
8  
9  
10  
11  
12  
13  
14  
15  
16  
17  
18  
19  
20  
21  
22  
23  
24  
25  
26  
27  
28  
29  
30  
31  
32  
33  
34  
35  
36  
37  
38  
39  
40  
41  
42  
43  
44  
45  
46  
47  
48  
49  
50  
51  
52  
53  
54  
55  
56  
57  
58  
59  
60

For peer review only

**Table 1.** Characteristics and general health of the participants by the level of physical activity

|                                    | Persistently non-active | Became inactive | Became active | Persistently active | p-value          |
|------------------------------------|-------------------------|-----------------|---------------|---------------------|------------------|
| <b>General characteristics</b>     |                         |                 |               |                     |                  |
| N, %                               | 1601 (36.9)             | 881 (20.3)      | 775 (17.9)    | 1082 (24.9)         |                  |
| Men, %                             | 44.3                    | 49.0            | 46.8          | 53.7                | <b>&lt;0.001</b> |
| Age, years                         | 55.0 ± 7.2              | 54.5 ± 7.1      | 53.4 ± 7.2    | 53.7 ± 7.2          | <b>&lt;0.001</b> |
| Body mass index, kg/m <sup>2</sup> | 27.6 ± 5.2              | 27.1 ± 4.9      | 27.1 ± 4.8    | 27.0 ± 4.4          | <b>0.007</b>     |
| Currently working, %               | 82.7                    | 85.8            | 88.9          | 90.4                | <b>&lt;0.001</b> |
| <b>Smoking history</b>             |                         |                 |               |                     |                  |
| Never, %                           | 42.4                    | 43.4            | 44.3          | 47.6                | <b>&lt;0.001</b> |
| Former, %                          | 34.4                    | 39.8            | 37.5          | 40.0                |                  |
| Current, %                         | 23.2                    | 16.9            | 18.2          | 12.4                |                  |

**Table 2.** Insomnia symptoms, sleep duration and daytime sleepiness by level of physical activity.

|                                                                                                                                                                                                                                            | <b>Persistently non-active</b><br>(n=1601) | <b>Became inactive</b><br>(n=881) | <b>Became active</b><br>(n=775) | <b>Persistently Active</b><br>(n=1082) | p-value          |
|--------------------------------------------------------------------------------------------------------------------------------------------------------------------------------------------------------------------------------------------|--------------------------------------------|-----------------------------------|---------------------------------|----------------------------------------|------------------|
| <b>Insomnia symptoms</b>                                                                                                                                                                                                                   |                                            |                                   |                                 |                                        |                  |
| Difficulties initiating sleep (%)                                                                                                                                                                                                          | 15.4                                       | 14.0                              | 11.7                            | 8.2                                    | <b>&lt;0.001</b> |
| Difficulties maintaining sleep (%)                                                                                                                                                                                                         | 31.9                                       | 32.1                              | 33.0                            | 28.5                                   | 0.128            |
| Early morning awakenings (%)                                                                                                                                                                                                               | 18.2                                       | 18.3                              | 15.0                            | 13.2                                   | <b>0.002</b>     |
| Any insomnia symptom (%)                                                                                                                                                                                                                   | 41.0                                       | 41.5                              | 39.5                            | 34.9                                   | <b>0.006</b>     |
| Numbers of insomnia symptoms                                                                                                                                                                                                               |                                            |                                   |                                 |                                        |                  |
| None (%)                                                                                                                                                                                                                                   | 58.4                                       | 58.2                              | 61.0                            | 64.9                                   | <b>0.001</b>     |
| One (%)                                                                                                                                                                                                                                    | 23.2                                       | 25.2                              | 24.0                            | 23.8                                   |                  |
| Two (%)                                                                                                                                                                                                                                    | 11.9                                       | 10.6                              | 10.0                            | 7.8                                    |                  |
| Three (%)                                                                                                                                                                                                                                  | 6.6                                        | 6.1                               | 5.1                             | 3.6                                    |                  |
| <b>Sleep duration</b>                                                                                                                                                                                                                      |                                            |                                   |                                 |                                        |                  |
| Sleep time (hours)                                                                                                                                                                                                                         | 6.8 ± 1.1                                  | 6.8 ± 1.0                         | 6.9 ± 1.0                       | 6.9 ± 0.9                              | 0.234            |
| Sleep time, %                                                                                                                                                                                                                              |                                            |                                   |                                 |                                        |                  |
| Short sleepers (≤ 6 hours)                                                                                                                                                                                                                 | 35.9                                       | 31.9                              | 20.7                            | 26.9                                   | <b>&lt;0.001</b> |
| Normal sleepers (6 – 9 hours)                                                                                                                                                                                                              | 59.2                                       | 64.6                              | 66.9                            | 70.9                                   |                  |
| Long sleepers (≥ 9 hours)                                                                                                                                                                                                                  | 4.9                                        | 3.5                               | 3.4                             | 2.2                                    |                  |
| <b>Daytime sleepiness</b>                                                                                                                                                                                                                  |                                            |                                   |                                 |                                        |                  |
| Epworth sleepiness scale score                                                                                                                                                                                                             | 6.8 ± 4.1                                  | 7.2 ± 4.1                         | 6.9 ± 4.1                       | 6.9 ± 3.8                              | 0.106            |
| Epworth sleepiness scale score >10 (%)                                                                                                                                                                                                     | 17.2                                       | 19.4                              | 17.7                            | 15.6                                   | 0.176            |
| Data are presented as mean ± standard deviation or % where indicated. Significant differences are in bold (p<0.05). *p-value from Pearson's chi-square test (numerical variables) and one-way analysis of variance (continuous variables). |                                            |                                   |                                 |                                        |                  |

**Table 3.** Independent association between the level of physical activity and medical disorders, insomnia symptoms, daytime sleepiness and sleep duration expressed as adjusted\* odds ratios (95% CI) with the persistently non-active group as reference. Bold text indicates statistical significance.

|                                    | <b>Became inactive</b><br>(n=881) | <b>Became active</b><br>(n=775) | <b>Persistently active</b><br>(n=1082) |
|------------------------------------|-----------------------------------|---------------------------------|----------------------------------------|
| <b>Insomnia symptoms</b>           |                                   |                                 |                                        |
| Difficulties initiating sleep      | 0.97 (0.75-1.25)                  | 0.82 (0.62-1.08)                | <b>0.58 (0.42-0.77)</b>                |
| Difficulties maintaining sleep     | 0.96 (0.80-1.17)                  | 1.04 (0.85-1.27)                | <b>0.80 (0.66-0.97)</b>                |
| Early morning awakenings           | 1.09 (0.87-1.38)                  | 0.86 (0.63-1.03)                | 0.80 (0.63-1.03)                       |
| Any insomnia symptom               | 1.02 (0.85-1.22)                  | 0.95 (0.78-1.14)                | <b>0.78 (0.65-0.94)</b>                |
| Numbers of insomnia symptoms       |                                   |                                 |                                        |
| One                                | 1.07 (0.86-1.32)                  | 0.99 (0.79-1.24)                | 0.91 (0.74-1.12)                       |
| Two                                | 0.89 (0.66-1.20)                  | 0.86 (0.63-1.17)                | <b>0.60 (0.43-0.82)</b>                |
| Three                              | 1.09 (0.74-1.59)                  | 0.94 (0.62-1.42)                | <b>0.63 (0.41-0.98)</b>                |
| <b>Daytime sleepiness</b>          |                                   |                                 |                                        |
| Epworth sleepiness scale score >10 | 1.17 (0.94-1.47)                  | 1.00 (0.78-1.27)                | 0.87 (0.69-1.10)                       |
| <b>Sleep duration</b>              |                                   |                                 |                                        |
| Short sleepers ( $\leq 6$ hours)   | 0.89 (0.73-1.07)                  | 0.85 (0.69-1.03)                | <b>0.71 (0.58-0.85)</b>                |
| Normal sleepers (6-9 hours)        | 1.18 (0.98-1.42)                  | <b>1.21 (1.00-1.47)</b>         | <b>1.55 (1.29-1.87)</b>                |
| Long sleepers ( $\geq 9$ hours)    | 0.74 (0.47-1.17)                  | 0.84 (0.53-1.33)                | <b>0.48 (0.28-0.80)</b>                |

\*Adjusted for age, sex, BMI, smoking history and center. Significant differences are in bold.

**Table 4.** Associations between age, sex, BMI and smoking history and sleep related symptoms.

|                                    | Age                     | Sex                     | BMI                     | Smoking history         |
|------------------------------------|-------------------------|-------------------------|-------------------------|-------------------------|
| <b>Insomnia symptoms</b>           |                         |                         |                         |                         |
| Difficulties initiating sleep      | <b>1.02 (1.01-1.03)</b> | <b>2.16 (1.77-2.64)</b> | <b>1.02 (1.01-1.05)</b> | <b>0.81 (0.66-0.99)</b> |
| Difficulties maintaining sleep     | <b>1.04 (1.03-1.05)</b> | <b>1.80 (1.56-2.07)</b> | <b>1.01 (1.00-1.03)</b> | 1.09 (0.95-1.26)        |
| Early morning awakenings           | <b>1.02 (1.01-1.03)</b> | <b>1.52 (1.28-1.80)</b> | 1.01 (1.00-1.03)        | 1.02 (0.85-1.21)        |
| Any insomnia symptom               | <b>1.03 (1.02-1.04)</b> | <b>1.75 (1.53-1.99)</b> | <b>1.02 (1.01-1.03)</b> | 1.07 (0.93-1.22)        |
| Numbers of insomnia symptoms       |                         |                         |                         |                         |
| One                                | <b>1.03 (1.01-1.04)</b> | <b>1.47 (1.26-1.71)</b> | <b>1.02 (1.00-1.03)</b> | 1.15 (0.98-1.34)        |
| Two                                | <b>1.04 (1.02-1.06)</b> | <b>2.11 (1.69-2.64)</b> | <b>1.02 (1.00-1.05)</b> | 1.01 (0.80-1.26)        |
| Three                              | <b>1.04 (1.02-1.06)</b> | <b>2.62 (1.93-3.53)</b> | 1.03 (0.99-1.06)        | 0.89 (0.66-1.20)        |
| <b>Daytime sleepiness</b>          |                         |                         |                         |                         |
| Epworth sleepiness scale score >10 | 0.99 (0.98-1.00)        | 0.95 (0.81-1.12)        | 1.01 (0.99-1.03)        | <b>1.28 (1.08-1.52)</b> |
| <b>Sleep duration</b>              |                         |                         |                         |                         |
| Short sleepers ( $\leq 6$ hours)   | 1.01 (0.99-1.02)        | 0.88 (0.77-1.00)        | <b>1.03 (1.02-1.05)</b> | <b>0.83 (0.72-0.96)</b> |
| Normal sleepers (6-9 hours)        | <b>0.99 (0.98-0.99)</b> | 1.08 (0.95-1.23)        | <b>0.96 (0.95-0.98)</b> | <b>1.20 (1.05-1.38)</b> |
| Long sleepers ( $\geq 9$ hours)    | <b>1.03 (1.01-1.06)</b> | 1.35 (0.96-1.89)        | 1.02 (0.99-1.06)        | 0.95 (0.67-1.34)        |



1  
2  
3 **Figure legends:**

4 **Figure 1.** Flow chart of the study population in the European community health survey  
5 (ECRSH)  
6

7  
8 **Figure 2.** Activity levels by country  
9

10 **Figure 3.** Prevalence of any insomnia symptom, short sleep duration ( $\leq 6$  hours per night),  
11 long sleep duration ( $\geq 9$  hours per night) and daytime sleepiness (ESS $>10$ ) by country.  
12  
13  
14  
15  
16  
17  
18  
19  
20  
21  
22  
23  
24  
25  
26  
27  
28  
29  
30  
31  
32  
33  
34  
35  
36  
37  
38  
39  
40  
41  
42  
43  
44  
45  
46  
47  
48  
49  
50  
51  
52  
53  
54  
55  
56  
57  
58  
59  
60

For peer review only

1  
2  
3  
4  
5  
6  
7  
8  
9  
10  
11  
12  
13  
14  
15  
16  
17  
18  
19  
20  
21  
22  
23  
24  
25  
26  
27  
28  
29  
30  
31  
32  
33  
34  
35  
36  
37  
38  
39  
40  
41  
42  
43  
44  
45  
46  
47  
48  
49  
50  
51  
52  
53  
54  
55  
56  
57  
58  
59  
60

For peer review only

**Figure 1.** Flow chart of the study population in the European community health survey (ECRSH)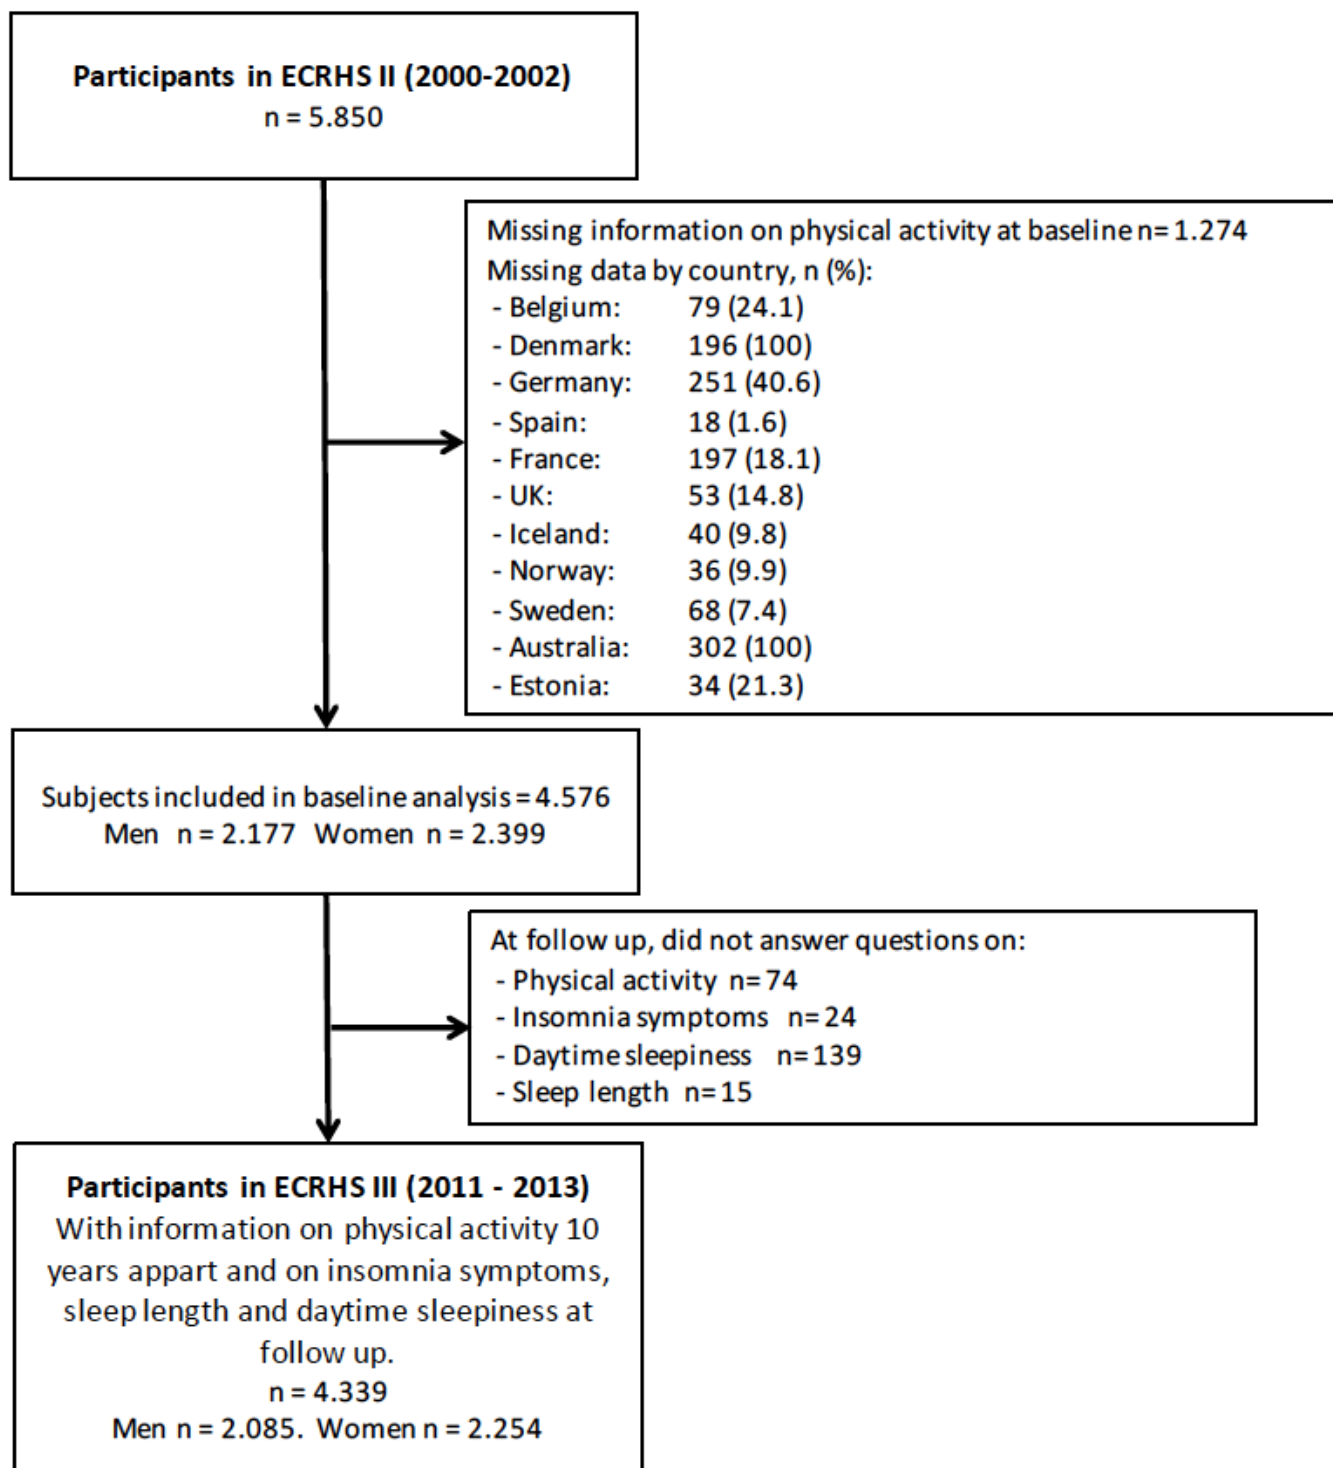



**Figure 2.** Activity levels by country

ew only

1  
2  
3  
4  
5  
6  
7  
8  
9  
10  
11  
12  
13  
14  
15  
16  
17  
18  
19  
20  
21  
22  
23  
24  
25  
26  
27  
28  
29  
30  
31  
32  
33  
34  
35  
36  
37  
38  
39  
40  
41  
42  
43  
44  
45  
46  
47  
48  
49  
50  
51  
52  
53  
54  
55  
56  
57  
58  
59  
60

For peer review only

## STROBE Statement—checklist of items that should be included in reports of observational studies

|                              | Item No | Recommendation                                                                                                                                                                                                                                                                                                                                                                                                                                                         | Page No  |
|------------------------------|---------|------------------------------------------------------------------------------------------------------------------------------------------------------------------------------------------------------------------------------------------------------------------------------------------------------------------------------------------------------------------------------------------------------------------------------------------------------------------------|----------|
| <b>Title and abstract</b>    | 1       | (a) Indicate the study's design with a commonly used term in the title or the abstract                                                                                                                                                                                                                                                                                                                                                                                 | 1        |
|                              |         | (b) Provide in the abstract an informative and balanced summary of what was done and what was found                                                                                                                                                                                                                                                                                                                                                                    | 3        |
| <b>Introduction</b>          |         |                                                                                                                                                                                                                                                                                                                                                                                                                                                                        |          |
| Background/rationale         | 2       | Explain the scientific background and rationale for the investigation being reported                                                                                                                                                                                                                                                                                                                                                                                   | 5        |
| Objectives                   | 3       | State specific objectives, including any prespecified hypotheses                                                                                                                                                                                                                                                                                                                                                                                                       | 5-6      |
| <b>Methods</b>               |         |                                                                                                                                                                                                                                                                                                                                                                                                                                                                        |          |
| Study design                 | 4       | Present key elements of study design early in the paper                                                                                                                                                                                                                                                                                                                                                                                                                | 6        |
| Setting                      | 5       | Describe the setting, locations, and relevant dates, including periods of recruitment, exposure, follow-up, and data collection                                                                                                                                                                                                                                                                                                                                        | 6-8      |
| Participants                 | 6       | (a) <i>Cohort study</i> —Give the eligibility criteria, and the sources and methods of selection of participants. Describe methods of follow-up<br><i>Case-control study</i> —Give the eligibility criteria, and the sources and methods of case ascertainment and control selection. Give the rationale for the choice of cases and controls<br><i>Cross-sectional study</i> —Give the eligibility criteria, and the sources and methods of selection of participants | 6        |
|                              |         | (b) <i>Cohort study</i> —For matched studies, give matching criteria and number of exposed and unexposed<br><i>Case-control study</i> —For matched studies, give matching criteria and the number of controls per case                                                                                                                                                                                                                                                 | N/A      |
| Variables                    | 7       | Clearly define all outcomes, exposures, predictors, potential confounders, and effect modifiers. Give diagnostic criteria, if applicable                                                                                                                                                                                                                                                                                                                               | 6-8      |
| Data sources/<br>measurement | 8*      | For each variable of interest, give sources of data and details of methods of assessment (measurement). Describe comparability of assessment methods if there is more than one group                                                                                                                                                                                                                                                                                   | 6-8      |
| Bias                         | 9       | Describe any efforts to address potential sources of bias                                                                                                                                                                                                                                                                                                                                                                                                              | 4, 12    |
| Study size                   | 10      | Explain how the study size was arrived at                                                                                                                                                                                                                                                                                                                                                                                                                              | 8, fig 1 |
| Quantitative variables       | 11      | Explain how quantitative variables were handled in the analyses. If applicable, describe which groupings were chosen and why                                                                                                                                                                                                                                                                                                                                           | 7-8      |
| Statistical methods          | 12      | (a) Describe all statistical methods, including those used to control for confounding                                                                                                                                                                                                                                                                                                                                                                                  | 7-8      |
|                              |         | (b) Describe any methods used to examine subgroups and interactions                                                                                                                                                                                                                                                                                                                                                                                                    | 7-8      |
|                              |         | (c) Explain how missing data were addressed                                                                                                                                                                                                                                                                                                                                                                                                                            | 8, fig 1 |
|                              |         | (d) <i>Cohort study</i> —If applicable, explain how loss to follow-up was addressed<br><i>Case-control study</i> —If applicable, explain how matching of cases and controls was addressed<br><i>Cross-sectional study</i> —If applicable, describe analytical methods taking account of sampling strategy                                                                                                                                                              | 8, fig 1 |

1  
2  
3  
4  
5  
6  
7  
8  
9  
10  
11  
12  
13  
14  
15  
16  
17  
18  
19  
20  
21  
22  
23  
24  
25  
26  
27  
28  
29  
30  
31  
32  
33  
34  
35  
36  
37  
38  
39  
40  
41  
42  
43  
44  
45  
46  
47  
48  
49  
50  
51  
52  
53  
54  
55  
56  
57  
58  
59  
60

(e) Describe any sensitivity analyses

Continued on next page



For peer review only

| <b>Results</b>           |     |                                                                                                                                                                                                              |                            |
|--------------------------|-----|--------------------------------------------------------------------------------------------------------------------------------------------------------------------------------------------------------------|----------------------------|
| Participants             | 13* | (a) Report numbers of individuals at each stage of study—eg numbers potentially eligible, examined for eligibility, confirmed eligible, included in the study, completing follow-up, and analysed            | 8, fig 1                   |
|                          |     | (b) Give reasons for non-participation at each stage                                                                                                                                                         | 8, fig 1                   |
|                          |     | (c) Consider use of a flow diagram                                                                                                                                                                           | Fig 1                      |
| Descriptive data         | 14* | (a) Give characteristics of study participants (eg demographic, clinical, social) and information on exposures and potential confounders                                                                     | 8                          |
|                          |     | (b) Indicate number of participants with missing data for each variable of interest                                                                                                                          | Table 1                    |
|                          |     | (c) <i>Cohort study</i> —Summarise follow-up time (eg, average and total amount)                                                                                                                             | 6                          |
| Outcome data             | 15* | <i>Cohort study</i> —Report numbers of outcome events or summary measures over time                                                                                                                          | 8-9                        |
|                          |     | <i>Case-control study</i> —Report numbers in each exposure category, or summary measures of exposure                                                                                                         | N/A                        |
|                          |     | <i>Cross-sectional study</i> —Report numbers of outcome events or summary measures                                                                                                                           | N/A                        |
| Main results             | 16  | (a) Give unadjusted estimates and, if applicable, confounder-adjusted estimates and their precision (eg, 95% confidence interval). Make clear which confounders were adjusted for and why they were included | Table 1, 2, 3 and page 8-9 |
|                          |     | (b) Report category boundaries when continuous variables were categorized                                                                                                                                    | See tables and methods     |
|                          |     | (c) If relevant, consider translating estimates of relative risk into absolute risk for a meaningful time period                                                                                             | x                          |
| Other analyses           | 17  | Report other analyses done—eg analyses of subgroups and interactions, and sensitivity analyses                                                                                                               | N/A                        |
| <b>Discussion</b>        |     |                                                                                                                                                                                                              |                            |
| Key results              | 18  | Summarise key results with reference to study objectives                                                                                                                                                     | 10                         |
| Limitations              | 19  | Discuss limitations of the study, taking into account sources of potential bias or imprecision. Discuss both direction and magnitude of any potential bias                                                   | 4, 12                      |
| Interpretation           | 20  | Give a cautious overall interpretation of results considering objectives, limitations, multiplicity of analyses, results from similar studies, and other relevant evidence                                   | 10-12                      |
| Generalisability         | 21  | Discuss the generalisability (external validity) of the study results                                                                                                                                        | 10, 12                     |
| <b>Other information</b> |     |                                                                                                                                                                                                              |                            |
| Funding                  | 22  | Give the source of funding and the role of the funders for the present study and, if applicable, for the original study on which the present article is based                                                | 2                          |

\*Give information separately for cases and controls in case-control studies and, if applicable, for exposed and unexposed groups in cohort and cross-sectional studies.

**Note:** An Explanation and Elaboration article discusses each checklist item and gives methodological background and published examples of transparent reporting. The STROBE checklist is best used in conjunction with this article (freely available on the Web sites of PLoS Medicine at <http://www.plosmedicine.org/>, Annals of Internal Medicine at <http://www.annals.org/>, and Epidemiology at <http://www.epidem.com/>). Information on the STROBE Initiative is available at [www.strobe-statement.org](http://www.strobe-statement.org).



# BMJ Open

## The association between physical activity over a 10-year period and current insomnia symptoms, sleep duration and daytime sleepiness – A European population-based study

|                                 |                                                                                                                                                                                                                                                                                                                                                                                                                                                                                                                                                                                                                                                                                                                                                                                                                                                                                                                                                                                                                                                                                                                                                                                                                                                                                                                                                                                                                                                                                                                                                                                                                                                                                                                                                                                                                                                                                                                                                                                                                                                                                                                                         |
|---------------------------------|-----------------------------------------------------------------------------------------------------------------------------------------------------------------------------------------------------------------------------------------------------------------------------------------------------------------------------------------------------------------------------------------------------------------------------------------------------------------------------------------------------------------------------------------------------------------------------------------------------------------------------------------------------------------------------------------------------------------------------------------------------------------------------------------------------------------------------------------------------------------------------------------------------------------------------------------------------------------------------------------------------------------------------------------------------------------------------------------------------------------------------------------------------------------------------------------------------------------------------------------------------------------------------------------------------------------------------------------------------------------------------------------------------------------------------------------------------------------------------------------------------------------------------------------------------------------------------------------------------------------------------------------------------------------------------------------------------------------------------------------------------------------------------------------------------------------------------------------------------------------------------------------------------------------------------------------------------------------------------------------------------------------------------------------------------------------------------------------------------------------------------------------|
| Journal:                        | <i>BMJ Open</i>                                                                                                                                                                                                                                                                                                                                                                                                                                                                                                                                                                                                                                                                                                                                                                                                                                                                                                                                                                                                                                                                                                                                                                                                                                                                                                                                                                                                                                                                                                                                                                                                                                                                                                                                                                                                                                                                                                                                                                                                                                                                                                                         |
| Manuscript ID                   | bmjopen-2022-067197.R2                                                                                                                                                                                                                                                                                                                                                                                                                                                                                                                                                                                                                                                                                                                                                                                                                                                                                                                                                                                                                                                                                                                                                                                                                                                                                                                                                                                                                                                                                                                                                                                                                                                                                                                                                                                                                                                                                                                                                                                                                                                                                                                  |
| Article Type:                   | Original research                                                                                                                                                                                                                                                                                                                                                                                                                                                                                                                                                                                                                                                                                                                                                                                                                                                                                                                                                                                                                                                                                                                                                                                                                                                                                                                                                                                                                                                                                                                                                                                                                                                                                                                                                                                                                                                                                                                                                                                                                                                                                                                       |
| Date Submitted by the Author:   | 15-Sep-2023                                                                                                                                                                                                                                                                                                                                                                                                                                                                                                                                                                                                                                                                                                                                                                                                                                                                                                                                                                                                                                                                                                                                                                                                                                                                                                                                                                                                                                                                                                                                                                                                                                                                                                                                                                                                                                                                                                                                                                                                                                                                                                                             |
| Complete List of Authors:       | <p>Bjornsdottir, Erla; Reykjavik University<br/>         Thorarinsdottir, Elin; Heilsugasla hofuoborgarsvaoisins; University of Iceland, Faculty of medicine<br/>         Lindberg, Eva ; Uppsala University, Department of Medical Sciences: Respiratory, Allergy and Sleep Research<br/>         Benediktsdottir, Bryndis; University of Iceland, Faculty of Medicine; Landspítali háskolasjúkrahús, Department of Sleep<br/>         Franklin, Karl; Umea Universitet, Department of Surgical and Perioperative Sciences<br/>         Jarvis, Debbie; Imperial College London School of Public Health, Population Health and Occupational Disease, National Heart and Lung Institute; Imperial College London, MRC-PHE Centre for Environment and Health<br/>         Demoly, Pascal ; University Hospital of Montpellier, France and Sorbonne Universités, University of Montpellier - Inserm UMR UA11<br/>         Perret, Jennifer; The University of Melbourne Melbourne Medical School<br/>         Garcia Aymerich, Judith; ISGlobal, Centre for Research in Environmental Epidemiology (CREAL); Universitat Pompeu Fabra<br/>         Dorado-Arenas, Sandra; Hospital Galdakao-Usansolo, Pulmonology Department<br/>         Heinrich, Joachim; Ludwig Maximilians University Munich, Institute and Clinic for Occupational, Social and Environmental Medicine; The University of Melbourne Melbourne Medical School, Allergy and Lung Health Unit, Melbourne School of Population and Global Health<br/>         Torén, Kjell; Goteborgs universitet Institutionen for medicin, Occupational and Environmental Medicine<br/>         Garcia Larsen, Vanessa; Johns Hopkins University Bloomberg School of Public Health, 17Program in Human Nutrition, Department of International Health<br/>         Jögi, Rain; Tartu University Hospital, The Lung Clinic<br/>         Gislason, Thorarinn; University of Iceland, Faculty of Medicine; Landspítali háskolasjúkrahús, Department of Sleep<br/>         Janson, Christer; Uppsala University, Department of Medical Sciences: Respiratory, Allergy and Sleep Research</p> |
| <b>Primary Subject Heading</b>: | Epidemiology                                                                                                                                                                                                                                                                                                                                                                                                                                                                                                                                                                                                                                                                                                                                                                                                                                                                                                                                                                                                                                                                                                                                                                                                                                                                                                                                                                                                                                                                                                                                                                                                                                                                                                                                                                                                                                                                                                                                                                                                                                                                                                                            |
| Secondary Subject Heading:      | Global health                                                                                                                                                                                                                                                                                                                                                                                                                                                                                                                                                                                                                                                                                                                                                                                                                                                                                                                                                                                                                                                                                                                                                                                                                                                                                                                                                                                                                                                                                                                                                                                                                                                                                                                                                                                                                                                                                                                                                                                                                                                                                                                           |

1  
2  
3  
4  
5  
6  
7  
8  
9  
10  
11  
12  
13  
14  
15  
16  
17  
18  
19  
20  
21  
22  
23  
24  
25  
26  
27  
28  
29  
30  
31  
32  
33  
34  
35  
36  
37  
38  
39  
40  
41  
42  
43  
44  
45  
46  
47  
48  
49  
50  
51  
52  
53  
54  
55  
56  
57  
58  
59  
60

|           |                                                                            |
|-----------|----------------------------------------------------------------------------|
| Keywords: | SLEEP MEDICINE, EPIDEMIOLOGY, PRIMARY CARE, PUBLIC HEALTH, SPORTS MEDICINE |
|           |                                                                            |

SCHOLARONE™  
Manuscripts



I, the Submitting Author has the right to grant and does grant on behalf of all authors of the Work (as defined in the below author licence), an exclusive licence and/or a non-exclusive licence for contributions from authors who are: i) UK Crown employees; ii) where BMJ has agreed a CC-BY licence shall apply, and/or iii) in accordance with the terms applicable for US Federal Government officers or employees acting as part of their official duties; on a worldwide, perpetual, irrevocable, royalty-free basis to BMJ Publishing Group Ltd ("BMJ") its licensees and where the relevant Journal is co-owned by BMJ to the co-owners of the Journal, to publish the Work in this journal and any other BMJ products and to exploit all rights, as set out in our [licence](#).

The Submitting Author accepts and understands that any supply made under these terms is made by BMJ to the Submitting Author unless you are acting as an employee on behalf of your employer or a postgraduate student of an affiliated institution which is paying any applicable article publishing charge ("APC") for Open Access articles. Where the Submitting Author wishes to make the Work available on an Open Access basis (and intends to pay the relevant APC), the terms of reuse of such Open Access shall be governed by a Creative Commons licence – details of these licences and which [Creative Commons](#) licence will apply to this Work are set out in our licence referred to above.

Other than as permitted in any relevant BMJ Author's Self Archiving Policies, I confirm this Work has not been accepted for publication elsewhere, is not being considered for publication elsewhere and does not duplicate material already published. I confirm all authors consent to publication of this Work and authorise the granting of this licence.

# The association between physical activity over a 10-year period and current insomnia symptoms, sleep duration and daytime sleepiness – A European population-based study

Erla Bjornsdottir<sup>1\*</sup>, Elin Helga Thorarinsdottir<sup>2,3\*</sup>, Eva Lindberg<sup>4</sup>, Bryndis Benediktsdottir<sup>3,5</sup>, Karl A Franklin<sup>6</sup>, Deborah L Jarvis<sup>7,8</sup>, Pascal Demoly<sup>9</sup>, Jennifer Perret<sup>10</sup>, Judith Garcia-Aymerich<sup>11,12</sup>, Sandra Dorado-Arenas<sup>13</sup>, Joachim Heinrich<sup>14,15</sup>, Kjell Toren<sup>16</sup>, Vanessa Garcia Larsen<sup>17</sup>, Rain Jogi<sup>18</sup> Thorarinn Gislason<sup>3,5\*\*</sup>, Christer Janson<sup>4\*\*</sup>

\*Co-first authors, \*\* Co-senior author

## Affiliations:

<sup>1</sup> University of Reykjavik, Iceland

<sup>2</sup> Primary Health Care of the Capital Area, Reykjavik, Iceland

<sup>3</sup> Faculty of Medicine, University of Iceland, Reykjavik, Iceland

<sup>4</sup> Department of Medical Sciences: Respiratory, Allergy and Sleep Research, Uppsala University, Uppsala, Sweden

<sup>5</sup> Department of Sleep, Landspítali - The National University Hospital of Iceland, Reykjavik, Iceland.

<sup>6</sup> Department of Surgical and Perioperative Sciences, Surgery, Umeå University, Umeå, Sweden

<sup>7</sup> Population Health and Occupational Disease, National Heart and Lung Institute, Imperial College London, London, UK

<sup>8</sup> MRC-PHE Centre for Environment and Health, Imperial College London, London, UK

<sup>9</sup> University Hospital of Montpellier, Montpellier, France and IDESP, University of Montpellier - Inserm UMR UA11

<sup>10</sup> University of Melbourne, Melbourne, Victoria, Australia.

<sup>11</sup> ISGlobal, Centre for Research in Environmental Epidemiology (CREAL), Barcelona, Spain

<sup>12</sup> Universitat Pompeu Fabra (UPF), Barcelona, Spain

<sup>13</sup> Pulmonology Department, Galdakao University Hospital, Osakidetza, Biocruces Bizkaia Health Research Institute, Biscay, Spain

<sup>14</sup> Institute and Clinic for Occupational, Social and Environmental Medicine, University Hospital, LMU Munich, Comprehensive Pneumology Center (CPC-M) Munich, German Center for Lung Research (DZL)

<sup>15</sup> Allergy and Lung Health Unit, Melbourne School of Population and Global Health, The University of Melbourne, Melbourne, Australia

<sup>16</sup> Department of Occupational and Environmental Medicine, Institute of Medicine, Sahlgrenska Academy, University of Gothenburg, Gothenburg, Sweden

<sup>17</sup> Program in Human Nutrition, Department of International Health, The Johns Hopkins Bloomberg School of Public Health, Baltimore, USA.

<sup>18</sup> The Lung Clinic, Tartu University Hospital, Tartu, Estonia.

Corresponding author:

Erla Bjornsdottir

[erlabjo@gmail.com](mailto:erlabjo@gmail.com)

00354-8608009

**Abstract:**

*Objectives:* To explore the relationship between physical activity over a 10-year period and current symptoms of insomnia, daytime sleepiness and estimated sleep duration in adults aged 39–67.

*Design:* Population-based, multi-centre cohort study.

*Setting:* 21 centres in 9 European countries.

*Methods:* Included were 4,339 participants in the third follow-up to the European Community Respiratory Health Survey (ECRHS III), who answered questions on physical activity at baseline (ECRHS II) and questions on physical activity, insomnia symptoms, sleep duration and daytime sleepiness at 10-years follow up (ECRHS III). Participants who reported that they exercised with a frequency of at least two or more times a week, for one hour a week or more, were classified as being physically active. Changes in activity status were categorised into four groups: persistently non-active; became inactive; became active; and persistently active.

*Main outcome measures:* Insomnia, sleep time and daytime sleepiness in relation to physical activity.

*Results:* Altogether, 37% of participants were persistently non-active, 25% were persistently active, 20% became inactive and 18% became active from baseline to follow up. Participants who were persistently active were less likely to report difficulties initiating sleep (OR 0.60 (95% CI 0.45-0.78)), a short sleep duration of  $\leq 6$  h/night (OR 0.71 (95% CI 0.59-0.85)) and a long sleep of  $\geq 9$  h/night (OR 0.53 (95% CI 0.33-0.84)) than persistently non-active subjects after adjusting for age, sex, BMI, smoking history and study centre. Daytime sleepiness and difficulties maintaining sleep were not related to physical activity status.

*Conclusion:* Physically active people have a lower risk of some insomnia symptoms and extreme sleep durations, both long and short.

**Strengths and limitations of this study:**

- The longitudinal study design, in which the exposure (physical activity) is measured 10 years prior to the sleep outcomes, enables an investigation into whether the consistency of physical activity over time has an impact on current symptoms of insomnia, sleep duration and daytime sleepiness.
- Data was collected using standardized and validated procedures and instruments, increasing its internal validity.
- Data was obtained from nine European countries, increasing the external validity of our findings.
- One limitation of our study is that sleep variables are only available at the follow up, which precluded testing their effect on baseline physical activity.
- Insomnia symptoms, sleep durations and daytime sleepiness data were obtained by questionnaire and no sleep disorder diagnoses from medical providers or objective assessments were available.

## Introduction

Disturbed sleep is common in the general population and impacts health and quality of life.(1-3) Chronic sleep disturbances are associated with cardiovascular disease, metabolic dysfunction, psychiatric disorders, and increased mortality.(4-6)

Physical activity and sleep: Regular exercise is associated with better health and several studies suggest that physical activity (PA) is beneficial to sleep and may improve symptoms of chronic insomnia.(7-10) It is, however, unclear how significant these benefits are and which factors may have a moderating effect upon them.(11) The positive association between PA and sleep may be subject to multiple moderating factors such as gender, age, BMI, fitness level, general health and the characteristics of the type of exercise in question. Therefore, sleep and PA probably influence each other through complex, reciprocal interactions including multiple physiological and psychological pathways.(7)

Physical activity and daytime sleepiness: There is evidence that more PA is associated with less daytime sleepiness.(12-17) Cross-sectional studies have shown that low PA is associated with an increased likelihood of excessive daytime sleepiness (EDS)(14-16) and that subjects participating in exercise are less likely to have EDS.(12, 17) In older adults, increasing PA by doing home exercises has been shown to improve EDS and reduce the prevalence of insomnia symptoms(13), while another study showed that increasing PA protected women from future insomnia.(18) Other studies have contradictory findings. In an epidemiological study of 4,405 Koreans, daytime sleepiness was more common among those in the top quartile of PA compared to those in the lowest quartile group.(19) Among patients with obstructive sleep apnoea, increased PA was associated with a lower severity of disease and a 28% decrease in EDS.(20) The daily association between PA and sleep duration was described in 2021, based on a systematic review and meta-analysis of 33 peer-reviewed papers, which showed that, on the night following increased PA, there was a lower total sleep time.(21)

Limitations of previous studies: There is a lack of epidemiological data from long-term follow up studies of large cohorts exploring the association of PA with sleep length, daytime sleepiness and insomnia symptoms. Previous research on physical activity

1  
2  
3 and sleep-related outcomes has several important limitations. Most studies are cross-  
4 sectional or have a short follow-up interval, preventing the possibility of elucidating  
5 whether increased physical activity improves sleeping outcomes or whether reduced  
6 physical activity is a consequence of sleep problems. Finally, the effects of physical  
7 activity on sleep length, daytime sleepiness, and insomnia symptoms have not been  
8 studied simultaneously.  
9  
10  
11  
12  
13  
14

15 Aims of the current study: Therefore, the aim of the present study was to assess the  
16 interrelationship between physical activity, based on frequency, duration and  
17 intensity, and symptoms of insomnia, self-reported sleep durations and daytime  
18 sleepiness among middle-aged subjects from 21 centres in nine countries at two  
19 moments in time, 10 years apart, providing important longitudinal follow-up data.  
20  
21  
22  
23  
24

## 25 **Material and methods**

### 26 *Subjects:*

27 We studied participants from the second and third follow-up surveys of the European  
28 Community Respiratory Health Survey (ECRHS II and III, [www.ecrhs.org](http://www.ecrhs.org)), an  
29 international, population-based, multi-centre cohort study of asthma and allergic  
30 disease, which was first carried out in 1990. Detailed descriptions of the methods  
31 used for ECRHS I and ECRHS II have been published elsewhere.(22, 23) Briefly,  
32 participating centres randomly selected samples from subjects aged 20 to 44 in  
33 order to track them for asthma, allergy and lung disease (See: [www.ecrhs.org](http://www.ecrhs.org)).  
34 Participants completed a short postal questionnaire about asthma and asthma-like  
35 symptoms and, from those who responded, a random sample was selected to  
36 undergo a more detailed clinical examination. In ECRHS II, subjects who had  
37 participated in the clinical phase of ECRHS I (performed between 1991 and 1994)  
38 were invited to participate in the follow-up study. The clinical phase of ECRHS II was  
39 carried out between 1998 and 2002. ECRHS III is the second follow-up study and  
40 was carried out from February 2011 to January 2014.(22-24) The present study is  
41 based on data from ECRHS II and III (see figure 1 for flowchart). Ethical approval for  
42 the study from local research ethics committees, and written consent from  
43 participants, were obtained.  
44  
45  
46  
47  
48  
49  
50  
51  
52  
53  
54  
55  
56  
57  
58  
59  
60

### *Health, habits and measurements*



1  
2  
3  
4  
5  
6  
7  
8  
9  
10  
11  
12  
13  
14  
15  
16  
17  
18  
19  
20  
21  
22  
23  
24  
25  
26  
27  
28  
29  
30  
31  
32  
33  
34  
35  
36  
37  
38  
39  
40  
41  
42  
43  
44  
45  
46  
47  
48  
49  
50  
51  
52  
53  
54  
55  
56  
57  
58  
59  
60

Subjects answered the core ECRHS questionnaires, which included questions on lifestyle, respiratory symptoms, smoking history and general health. 'Current smokers' were defined as those who smoked tobacco regularly during the last month. 'Former smokers' were defined as smokers who denied having smoked regularly in the month prior to the examination. Those who reported no regular smoking at the time of, or prior to, the examination, were defined as 'never smokers'. The participants' height and weight were measured and their body mass index (BMI) was calculated.(24)

### *Assessment of physical activity*

Physical activity was assessed in ECRHS II and III using replies from questionnaires. The assessment of PA in ECRHS has previously been described in detail, including how both the frequency and duration of PA were used to divide the population into categories.(22) In brief, participants were asked how often and for how many hours per week they usually exercised to the point that they became out of breath or sweaty. Participants who exercised two or more times a week, for at least 1 hour a week, were classified as physically active. Changes in activity status from baseline to follow up were categorised into four PA groups: persistently non-active (non-active at both baseline and follow up), became inactive (active at baseline and non-active at follow up), became active (non-active at baseline and active at follow up) and persistently active (active at both baseline and follow up).

### *Sleep questionnaires and measurements*

Sleep-related symptoms were assessed using the Basic Nordic Sleep Questionnaire(25), where participants were asked about the frequency of insomnia symptoms. Answers were provided on a scale of 1–5: (1) never or very seldom, (2) less than once a week, (3) once to twice a week, (4) three to five times a week, (5) every day or almost every day of the week. Insomnia symptoms were defined using answers to three questions from the Basic Nordic Sleep Questionnaire: "I have difficulties falling asleep at night" (difficulties initiating sleep), "I wake up often during the night" (difficulties maintaining sleep) and "I wake up early in the morning and can't fall back asleep" (early morning awakenings). Those who reported these symptoms of insomnia  $\geq 3$  times a week (scores 4 and 5) were considered to have the

1  
2  
3 corresponding insomnia subtype. Daytime sleepiness was evaluated using the  
4  
5  
6 Epworth Sleepiness Scale, a brief questionnaire that measures daytime sleepiness  
7  
8  
9 based on the likelihood of falling asleep in eight different situations.<sup>(26)</sup> Participants  
10  
11 with an Epworth sleepiness scale score >10 were considered to have EDS.  
12  
13 Participants were asked the question: how much sleep do you estimate that you get  
14  
15 on average each night? According to their answers, they were classified as: short  
16  
17 sleepers ( $\leq 6$  hours/night), normal sleepers (6–9 hours/night) or long sleepers  
18  
19  
20 ( $\geq 9$  hours/night).  
21  
22  
23  
24

### 25 *Patient and public involvement*

26 The study's design did not involve patients or the general public. However, all  
27  
28 participating patients were informed of the research objectives and their informed  
29  
30 consent was obtained. The survey was completed by participants voluntarily and no  
31  
32 input from patients was sought in interpreting or writing up the results. The results of  
33  
34 the research will not be disseminated to the patients.  
35  
36

### 37 *Statistical analysis*

38 Data are presented as numbers and percentages or mean  $\pm$ SD, depending on  
39  
40 distribution. For bivariate analysis, the  $\chi^2$  test and one-way analysis of variance were  
41  
42 used for nominal and continuous variables. Logistic regression was used for  
43  
44 multivariable analyses to estimate the association between physical activity and  
45  
46 sleep-related outcomes. The model was adjusted for potential confounders including  
47  
48 age, sex, BMI, smoking history and study centre. In the analysis, all variables,  
49  
50 including study centre (n=21), were treated as fixed effects. STATA V.16 was used  
51  
52 for all statistical analyses.  
53  
54

## 54 **Results**

### 55 *Participants and level of physical activity*

56 From a total of 5,850 participants in ECRHS II, we excluded those with missing data  
57  
58 and included a total of 4,339 participants (48% men), see Figure 1. Figure 2 shows  
59  
60

1  
2  
3 the prevalence of insomnia symptoms, short and long sleep durations, and daytime  
4 sleepiness among subjects in the different countries included in the study. From  
5 baseline to 10 years later, 36.9% of participants were persistently non-active, 17.9%  
6 became physically active at follow up, 20.3% of participants became inactive, and  
7 24.9% were persistently active (Table 1). There were geographical differences in the  
8 level of physical activity between the ECRHS countries (Figure 3). Participants in  
9 Norway were most likely to be persistently active, while participants in Spain,  
10 followed by Estonia, were most likely to be persistently non-active (Figure 3).

### 11 12 13 14 15 16 17 18 19 *General characteristics and health*

20 Persistently active participants were more often men, they were younger, and they  
21 had a slightly lower BMI (Table 1). They were also less likely to be current smokers  
22 and more likely to be currently working (Table 1).

### 23 24 25 26 27 28 *Insomnia symptoms*

29 In unadjusted analysis, there was a significant difference in reporting difficulties  
30 initiating sleep, early morning awakenings and any insomnia symptom where those  
31 persistently active were least likely to report these symptoms. Also, persistently  
32 active subjects were the least likely to report having two or three insomnia symptoms  
33 (Table 2). After adjusting for age, sex, BMI, smoking history and study centre, this  
34 negative association remained significant for difficulties initiating sleep (OR 0.58  
35 (0.42-0.77)), any insomnia symptom (OR 0.78 (0.65-0.94) and reporting two (OR  
36 0.60 (0.43-0.82) and three (OR 0.63 (0.41-0.98) insomnia symptoms (Table 3).  
37 Additionally, in adjusted analysis, persistently active subjects were significantly less  
38 likely to report difficulties initiating sleep (OR 0.80 (0.66-0.97) (Table 3). There were  
39 also independent associations between insomnia symptoms and age, female gender  
40 and BMI (Table 4).

### 41 42 43 44 45 46 47 48 49 50 51 *Sleep duration and daytime sleepiness*

52 In unadjusted analysis, there was a significant difference in short and long sleep  
53 durations between levels of activity. Those who were persistently active were most  
54 likely to be normal sleepers while the persistently non-active were least likely to be in  
55 that category (70.9% vs. 59.2% respectively) (Table 2). After adjusting for age, sex,  
56 BMI, smoking history and study centre, these results remained significant for  
57  
58  
59  
60

1  
2  
3 persistently active subjects. They were significantly more likely to be normal sleepers  
4 (OR 1.55 (1.29-1.87)) and significantly less likely to be short sleepers (OR 0.71 (0.58-  
5 0.85)) or long sleepers (OR 0.48 (0.28-0.80)) (Table 3). Additionally, those who  
6 became active were more likely to be normal sleepers than those who were  
7 persistently non-active (OR 1.21 (1.00-1.47)) (Table 3).  
8  
9 However, there was not a significant association between the mean Epworth  
10 sleepiness scale score or percentage with an Epworth sleepiness scale score >10  
11 and level of physical activity (Tables 2 and 3). Daytime sleepiness was also  
12 independently associated with smoking (Table 4).  
13  
14  
15  
16  
17  
18  
19  
20  
21  
22  
23  
24  
25  
26  
27  
28  
29  
30  
31  
32  
33  
34  
35  
36  
37  
38  
39  
40  
41  
42  
43  
44  
45  
46  
47  
48  
49  
50  
51  
52  
53  
54  
55  
56  
57  
58  
59  
60

For peer review only

## Discussion

The main results of this study were that participants who reported being physically active at the start and end of a 10-year follow-up period were less likely to report insomnia symptoms at the follow up. We also found that subjects who are persistently active are more likely to sleep the recommended 6-9 hours. This association remained statistically significant after adjusting for sex, age, smoking history and BMI. We also found that persistently active participants were more often men, were younger, had a slightly lower BMI and were less likely to be current smokers and more likely to be currently working.

Our results are in line with previous studies that have shown the beneficial effect of physical activity on symptoms of insomnia (9, 10), but the current study additionally shows the importance of consistency in exercising over time, because the association was lost for initially active subjects who became inactive. A recent meta-analysis examining the effects of acute and regular exercise on a range of sleep variables showed that acute exercise (less than one week of exercise) has a small beneficial effect on many objective measures of sleep, such as total sleep time, insomnia symptoms and sleep quality.(7) Furthermore, this meta-analysis found greater benefits from regular exercise for both subjective and objective sleep parameters over time. Regular exercise had small beneficial effects on total sleep time and sleep efficiency, small-to-medium beneficial effects on sleep onset latency, and moderate beneficial effects on sleep quality.(7)

There are two recent systematic reviews and meta-analyses on the effects of PA on sleep(7) and insomnia(9), both substantially reviewing the same randomized controlled studies. Banno *et al.* included nine studies with a total of 557 participants.(7) The majority of participants exercised 3 times or less per week and the follow up interval was 4 months or shorter in all the studies except one. Their conclusion was that exercise could improve sleep, but that higher quality research was needed.(7) Five studies on insomnia, and, additionally, six on insomnia symptoms, showed shorter sleep latency and higher sleep efficacy, but the authors also acknowledged the small size of the literature and severe methodological limitations, often based on selection bias.(9) In addition, most previous studies are cross-sectional, which can also be considered a limitation.

1  
2  
3 Furthermore, a recent systematic review of physical activity and sleep showed that  
4 moderate exercise had a more promising outcome in terms of sleep quality than  
5 vigorous exercise. It is therefore important to study further the impact of the intensity  
6 of physical activity, in the context of age and gender, when exploring any beneficial  
7 impact on sleep.(27)  
8  
9  
10  
11  
12

13 This study has a long follow-up period (10 years) and indicates strongly that  
14 consistency in physical activity might be an important factor in optimizing sleep  
15 duration and reducing the symptoms of insomnia. Most other studies have had a  
16 much shorter follow-up period(7), which makes it more difficult to assess the  
17 consistency of activity over time.  
18  
19  
20  
21

22 Our results indicate that those who maintain a consistent level of physical activity are  
23 also less likely to be both short (<6h) and long sleepers (>9h). Those who are  
24 physically active in general are also more likely to engage in a healthier lifestyle (28),  
25 which can likewise have an effect on sleep. Lifestyle factors, such as a healthy diet  
26 and being physically active, are probably part of a phenotype that characterizes  
27 those individuals who are generally engaged in a healthy lifestyle. A recent review  
28 highlighted the importance of focusing on the combination of sleep, diet and exercise  
29 when exploring healthy longevity.(29)  
30  
31  
32  
33  
34  
35  
36  
37

38 The three groups reporting low physical activity in either of the ECRHS surveys, or at  
39 both points in time, all report a very similar prevalence of insomnia symptoms,  
40 extreme sleep lengths and daytime sleepiness. This is somewhat surprising,  
41 especially given that those who were active in the follow-up survey but not at the  
42 baseline have a very similar symptom profile to those who were inactive in both  
43 surveys. Our study found that consistency in a behaviour such as physical activity for  
44 more than a decade is strongly related to a lower incidence of insomnia and a more  
45 “normal” sleep length. Important information concerning “the healthy phenotype”  
46 would be missed if the physical activity data were available only at baseline or at  
47 follow up but not at both time points.  
48  
49  
50  
51  
52  
53  
54  
55  
56

57 In a recent review based on 22 randomized controlled trials concerning the effects of  
58 regular exercise (lasting at least two months on a regular basis) on self-reported  
59 sleep quality, insomnia and daytime sleepiness, it was found that regular physical  
60

1  
2  
3 activity improved subjective sleep quality, insomnia severity and daytime sleepiness  
4 as measured with the Epworth sleepiness scale.(30) These results regarding  
5 insomnia symptoms are in line with our study, but the results on daytime sleepiness  
6 differ from our results. The reason for this discrepancy could be due to different study  
7 populations, as there were only two studies in this review that measured daytime  
8 sleepiness using the Epworth sleepiness scale; one study assessed this among the  
9 elderly, 60 years and older(13), and the other among overweight and obese men.(31)  
10 Another recent review of 32 randomized control trials on the effects of exercise on  
11 improving sleep disturbances showed that exercise is beneficial in improving sleep  
12 quality, symptoms of insomnia, restless legs, sleep apnoea and daytime sleepiness.  
13 However, exercise only had significant effects on sleepiness if it had lasted for more  
14 than 12 weeks, while the exercise period did not matter in regards of the association  
15 to sleep quality and insomnia symptoms.(32)

16 Another recent study showed that high or increasing levels of physical activity could  
17 protect women from future insomnia.(18) Therefore, exercise seems to have a  
18 stronger association with sleep quality and insomnia than with sleepiness, which is in  
19 line with our results. However almost all previous studies, have the limitation that the  
20 definition of sleepiness is limited to the estimate the likelihood of falling asleep but  
21 not the general feeling of sleepiness, that we have shown is also an important part of  
22 sleepiness.(33, 34) Another recent review exploring the associations of exercise,  
23 sleep and cognitive function among older adults showed that physical activity is  
24 associated with improved cognitive function but the association of sleep and  
25 cognitive function seems to be U-shaped, as too much or too little sleep is negatively  
26 associated with cognitive function.(35) We did not explore cognitive function in the  
27 current study but It would be interesting for future studies to explore further how  
28 cognitive function is affected by the association of physical activity and sleep.  
29  
30  
31  
32  
33  
34  
35  
36  
37  
38  
39  
40  
41  
42  
43  
44  
45  
46  
47  
48

49 This study has several strengths such as the population-based nature, the  
50 longitudinal study design and the large sample collected in the same manner at many  
51 centres in 9 different countries. Another strength is the use of standardized and  
52 validated procedures and instruments. The long follow up period is also a strength  
53 since data on physical activity is collected ten years apart and subjects are  
54 categorized according to change in physical activity. This study is however not  
55 without limitations. It is not possible to know whether those who are active at both  
56  
57  
58  
59  
60

1  
2  
3 timepoints have been continuously physically active throughout the study period or  
4 only at these two timepoints. Furthermore, physical activity was only measured using  
5 a questionnaire. Another limitation of our study is that sleep variables are only  
6 available at the follow-up, and we only have information on insomnia symptoms but  
7 not the diagnosis of insomnia disorder. Sleep length and daytime sleepiness are also  
8 based on subjective data. Therefore, even though the measurement of physical  
9 activity is longitudinal, it may not be entirely appropriate to describe the associations  
10 between physical activity and sleep outcomes as longitudinal. Also, there are  
11 potential implications of residual confounders that can influence both physical activity  
12 and sleep which were not explored in the current study (e.g. mental health,  
13 musculoskeletal disorders/ chronic pain) which could influence the study findings.  
14  
15  
16  
17  
18  
19  
20  
21  
22  
23

24 In conclusion, physical activity over time is associated with lower prevalence of  
25 insomnia symptoms and with sleeping between 6-9 hours per night.  
26  
27  
28

29 **Contributors:** EHT and EB are the co-first authors of the paper and they equally  
30 drafted, participated in manuscript preparation and were responsible for  
31 communications with other co-authors. TG and CJ participated in the design of the  
32 study, in the manuscript preparation and in review of the manuscript on several  
33 stages. EHT performed the statistical analysis with help from CJ. Eva Lindberg,  
34 Bryndis Benediktsdottir, Karl A Franklin, Deborah L Jarvis, Pascal Demoly, Jennifer  
35 Perret, Judith Garcia-Aymerich, Sandra Dorado-Arenas, Joachim Heinrich, Kjell  
36 Toren, Vanessa Garcia Larsen and Rain Jogi participated in data collection and/or in  
37 reviewing of the paper.  
38  
39  
40  
41  
42  
43  
44  
45

46 **Competing interests:** None declared  
47  
48  
49

50 **Funding: Financial Support for ECRHS III: Australia:** National Health & Medical  
51 Research Council, **Belgium: Antwerp South, Antwerp City:** Research Foundation  
52 Flanders (FWO), grant code G.0.410.08.N.10 (both sites), **Estonia: Tartu-**  
53 **SF0180060s09** from the Estonian Ministry of Education. **France: (All)** Ministère de la  
54 Santé. Programme Hospitalier de Recherche Clinique (PHRC) national 2010.  
55 **Bordeaux:** INSERM U897 Université Bordeaux segalen, **Grenoble:** Comite  
56 Scientifique AGIRadom 2011. **Paris:** Agence Nationale de la Santé, Région Ile de  
57  
58  
59  
60



1  
2  
3 France, domaine d'intérêt majeur (DIM) **Germany : Erfurt:** German Research  
4 Foundation HE 3294/10-1 **Hamburg:** German Research Foundation MA 711/6-1, NO  
5 262/7-1 **Iceland:** Reykjavik, The Landspítali University Hospital Research Fund,  
6 University of Iceland Research Fund, The Icelandic Collage of Family Physicians  
7 research found, ResMed Foundation, California, USA, Orkuveita Reykjavíkur  
8 (Geothermal plant), Vegagerðin (The Icelandic Road Administration (ICERA). The  
9 Icelandic Research found - grant no 173701-052 **Italy:** All Italian centres were  
10 funded by the Italian Ministry of Health, Chiesi Farmaceutici SpA, in addition **Verona**  
11 was funded by Cariverona foundation, Education Ministry (MIUR). **Norway:**  
12 Norwegian Research council grant no 214123, Western Norway Regional Health  
13 Authorities grant no 911631, Bergen Medical Research Foundation. **Spain:** Fondo  
14 de Investigación Sanitaria (PS09/02457, PS09/00716 09/01511) PS09/02185  
15 PS09/03190), Servicio Andaluz de Salud , Sociedad Española de Neumología y  
16 Cirugía Torácica (SEPAR 1001/2010); **Barcelona:**Fondo de Investigación Sanitaria  
17 (FIS PS09/00716) **Galdakao:** Fondo de Investigación Sanitaria (FIS 09/01511)  
18 **Huelva:** Fondo de Investigación Sanitaria (FIS PS09/02185) and Servicio Andaluz de  
19 Salud **Oviedo:** Fondo de Investigación Sanitaria (FIS PS09/03190) **Sweden:** All  
20 centres were funded by The Swedish Heart and Lung Foundation, The Swedish  
21 Asthma and Allergy Association, The Swedish Association against Lung and Heart  
22 Disease, Swedish Research Council for health, working life and welfare (FORTE)  
23 **Göteborg:** Also received further funding from the Swedish Council for Working life  
24 and Social Research. **Umea** also received funding from Vasterbotten Country  
25 Council ALF grant. **Switzerland:** The Swiss National Science Foundation (grants no  
26 33CSCO-134276/1, 33CSCO-108796, 3247BO-104283, 3247BO-104288, 3247BO-  
27 104284, 3247-065896, 3100-059302, 3200-052720, 3200-042532, 4026-028099)  
28 The Federal office for forest, environment and landscape, The Federal Office of  
29 Public Health, The Federal Office of Roads and Transport, the canton's government  
30 of Aargau, Basel-Stadt, Basel-Land, Geneva, Luzern, Ticino, Valais and Zürich, the  
31 Swiss Lung League, the canton's Lung League of Basel Stadt/ Basel, Landschaft,  
32 Geneva, Ticino, Valais and Zurich, SUVA, Freiwillige Akademische Gesellschaft,  
33 UBS Wealth Foundation, Talecris Biotherapeutics GmbH, Abbott Diagnostics,  
34 European Commission 018996 (GABRIEL), Wellcome Trust WT 084703MA, **UK:**  
35 Medical Research Council (Grant Number 92091). Support also provided by the  
36 National Institute for Health Research through the Primary Care Research Network  
37  
38  
39  
40  
41  
42  
43  
44  
45  
46  
47  
48  
49  
50  
51  
52  
53  
54  
55  
56  
57  
58  
59  
60

1  
2  
3  
4  
5 **Data sharing statement:** Data are available on reasonable request. The data that  
6 supports the findings of this study are available on request from the corresponding  
7 author.  
8  
9

10  
11 **Ethics approval statement:** Ethical approval for the study from the local research  
12 ethics committees and written consent from participants were obtained at each site.  
13

14 **Australia:** Monash University Human Research Ethics Committee Project #  
15 CF11/1818-2010001012, **Belgium:** Comité voor Medische Ethiek UZA/UA 11/41/288  
16 – UA, **Denmark:** De Videnskabetiske Komiteer for region Midtjylland. M-20110106,  
17 **Estonia:** Research Ethics Committee of the University of Tartu (UT REC) 209T-17  
18 and 225/M-24, **France:** Etude ECRHS III: promotion CHU de Grenoble. Ethical  
19 approval CPP Sud est V 4 mars 2011. Approval Ministry of Health AFSSAPS  
20 n°B110053-70 (Paris), Etude ECRHS III: promotion CHU de Grenoble. Ethical  
21 approval CPP Sud est V 4 mars 2011. Approval Ministry of Health AFSSAPS  
22 n°B110053-70 (Grenoble), Etude ECRHS III : promotion CHU de Grenoble. Ethical  
23 approval CPP Sud est V 4 mars 2011. Approval Ministry of Health AFSSAPS  
24 n°B110053-70 (Montpellier), Etude ECRHS III : promotion CHU de Grenoble. Ethical  
25 approval CPP Sud est V 4 mars 2011. Approval Ministry of Health AFSSAPS  
26 n°B110053-70 (Bordeaux), **Germany:** Ethikkommission der Bayerischen  
27 Landesärztekammer (Positive Votum: 10015), **Iceland:** National Bioethics committee  
28 of Iceland VSN-11-121-S3, **Italy:** Ethics Committee of IRCCS "San Matteo" Hospital  
29 Foundation, University of Pavia, Pavia (approval number 24215/2011) (Pavia),  
30 "Comitato Etico per la sperimentazione dell'Azienda Ospedaliera Universitaria  
31 Integrata di Verona", N. Prog. 1393 (Verona), **Norway:** Regional Ethics Committee  
32 West Norway 2010/759, **Spain:** Ethics Committee of the Parc de Salut Mar,  
33 Barcelona (Comité etic d'investigacio clínica (CEIC)- Parc de Salut Mar, Barcelona  
34 (Approval number) 2009/3500/1. **Switzerland:** Swiss Academy of Sciences,  
35 **Sweden:** Regional Ethical Review Board in Uppsala. And the number of the decision  
36 is 2010/432, **UK:** NRES committee London-Stammore REC Ref: 11/LO/0965  
37  
38  
39  
40  
41  
42  
43  
44  
45  
46  
47  
48  
49  
50  
51  
52  
53  
54  
55  
56  
57  
58  
59  
60

## References

1. Benca RM. Diagnosis and treatment of chronic insomnia: a review. *Psychiatr Serv*. 2005;56(3):332-43.
2. Gottlieb DJ, Redline S, Nieto FJ, Baldwin CM, Newman AB, Resnick HE, et al. Association of usual sleep duration with hypertension: the Sleep Heart Health Study. *Sleep*. 2006;29(8):1009-14.
3. Sivertsen B, Lallukka T, Salo P, Pallesen S, Hysing M, Krokstad S, et al. Insomnia as a risk factor for ill health: results from the large population-based prospective HUNT Study in Norway. *J Sleep Res*. 2014;23(2):124-32.
4. Gangwisch JE, Heymsfield SB, Boden-Albala B, Buijs RM, Kreier F, Pickering TG, et al. Short sleep duration as a risk factor for hypertension: analyses of the first National Health and Nutrition Examination Survey. *Hypertension*. 2006;47(5):833-9.
5. Luyster FS, Strollo PJ, Jr., Zee PC, Walsh JK, Boards of Directors of the American Academy of Sleep M, the Sleep Research S. Sleep: a health imperative. *Sleep*. 2012;35(6):727-34.
6. Taheri S. The link between short sleep duration and obesity: we should recommend more sleep to prevent obesity. *Arch Dis Child*. 2006;91(11):881-4.
7. Banno M, Harada Y, Taniguchi M, Tobita R, Tsujimoto H, Tsujimoto Y, et al. Exercise can improve sleep quality: a systematic review and meta-analysis. *PeerJ*. 2018;6:e5172.
8. Kredlow MA, Capozzoli MC, Hearon BA, Calkins AW, Otto MW. The effects of physical activity on sleep: a meta-analytic review. *J Behav Med*. 2015;38(3):427-49.
9. Lowe H, Haddock G, Mulligan LD, Gregg L, Fuzellier-Hart A, Carter LA, et al. Does exercise improve sleep for adults with insomnia? A systematic review with quality appraisal. *Clin Psychol Rev*. 2019;68:1-12.
10. Passos GS, Poyares D, Santana MG, Garbuio SA, Tufik S, Mello MT. Effect of acute physical exercise on patients with chronic primary insomnia. *J Clin Sleep Med*. 2010;6(3):270-5.
11. Kelley GA, Kelley KS. Exercise and sleep: a systematic review of previous meta-analyses. *J Evid Based Med*. 2017;10(1):26-36.
12. Andrianasolo RM, Menai M, Galan P, Herberg S, Oppert JM, Kesse-Guyot E, et al. Leisure-Time Physical Activity and Sedentary Behavior and Their Cross-Sectional Associations with Excessive Daytime Sleepiness in the French SU.VI.MAX-2 Study. *Int J Behav Med*. 2016;23(2):143-52.
13. Brandao GS, Gomes G, Brandao GS, Callou Sampaio AA, Donner CF, Oliveira LVF, et al. Home exercise improves the quality of sleep and daytime sleepiness of elderlies: a randomized controlled trial. *Multidiscip Respir Med*. 2018;13:2.
14. Chasens ER, Sereika SM, Weaver TE, Umlauf MG. Daytime sleepiness, exercise, and physical function in older adults. *J Sleep Res*. 2007;16(1):60-5.
15. Hays JC, Blazer DG, Foley DJ. Risk of napping: excessive daytime sleepiness and mortality in an older community population. *J Am Geriatr Soc*. 1996;44(6):693-8.
16. McClain JJ, Lewin DS, Laposky AD, Kahle L, Berrigan D. Associations between physical activity, sedentary time, sleep duration and daytime sleepiness in US adults. *Prev Med*. 2014;66:68-73.
17. Vuori I, Urponen H, Hasan J, Partinen M. Epidemiology of exercise effects on sleep. *Acta Physiol Scand Suppl*. 1988;574:3-7.
18. Sporndly-Nees S, Asenlof P, Lindberg E. High or increasing levels of physical activity protect women from future insomnia. *Sleep Med*. 2017;32:22-7.
19. Joo S, Baik I, Yi H, Jung K, Kim J, Shin C. Prevalence of excessive daytime sleepiness and associated factors in the adult population of Korea. *Sleep Med*. 2009;10(2):182-8.
20. Iftikhar IH, Kline CE, Youngstedt SD. Effects of exercise training on sleep apnea: a meta-analysis. *Lung*. 2014;192(1):175-84.
21. Atoui S, Chevance G, Romain AJ, Kingsbury C, Lachance JP, Bernard P. Daily associations between sleep and physical activity: A systematic review and meta-analysis. *Sleep Med Rev*. 2021;57:101426.
22. Fuertes E, Carsin AE, Anto JM, Bono R, Corsico AG, Demoly P, et al. Leisure-time vigorous physical activity is associated with better lung function: the prospective ECRHS study. *Thorax*. 2018;73(4):376-84.

- 1
- 2
- 3 23. Janson C, Anto J, Burney P, Chinn S, de Marco R, Heinrich J, et al. The European Community
- 4 Respiratory Health Survey: what are the main results so far? European Community Respiratory
- 5 Health Survey II. *Eur Respir J*. 2001;18(3):598-611.
- 6 24. Bjornsdottir E, Janson C, Lindberg E, Arnardottir ES, Benediktsdottir B, Garcia-Aymerich J, et
- 7 al. Respiratory symptoms are more common among short sleepers independent of obesity. *BMJ*
- 8 *Open Respir Res*. 2017;4(1):e000206.
- 9 25. Partinen M, Gislason T. Basic Nordic Sleep Questionnaire (BNSQ): a quantitated measure of
- 10 subjective sleep complaints. *J Sleep Res*. 1995;4(S1):150-5.
- 11 26. Johns MW. A new method for measuring daytime sleepiness: the Epworth sleepiness scale.
- 12 *Sleep*. 1991;14(6):540-5.
- 13 27. Wang F, Boros S. The effect of physical activity on sleep quality: a systematic review.
- 14 *European Journal of Physiotherapy*. 2021;23(1):11-8.
- 15 28. Cobb-Clark DA, Kassenboehmer, S. C., & Schurer, S. Healthy habits: The connection between
- 16 diet, exercise, and locus of control. *Journal of Economic Behavior & Organization*. 2014;98:1-28.
- 17 29. Min S, Masanovic B, Bu T, Matic RM, Vasiljevic I, Vukotic M, et al. The Association Between
- 18 Regular Physical Exercise, Sleep Patterns, Fasting, and Autophagy for Healthy Longevity and Well-
- 19 Being: A Narrative Review. *Front Psychol*. 2021;12:803421.
- 20 30. Xie Y, Liu S, Chen XJ, Yu HH, Yang Y, Wang W. Effects of Exercise on Sleep Quality and
- 21 Insomnia in Adults: A Systematic Review and Meta-Analysis of Randomized Controlled Trials. *Front*
- 22 *Psychiatry*. 2021;12:664499.
- 23 31. Tan X, Alen M, Wiklund P, Partinen M, Cheng S. Effects of aerobic exercise on home-based
- 24 sleep among overweight and obese men with chronic insomnia symptoms: a randomized controlled
- 25 trial. *Sleep Med*. 2016;25:113-21.
- 26 32. Amiri S, Hasani J, Satkin M. Effect of exercise training on improving sleep disturbances: a
- 27 systematic review and meta-analysis of randomized control trials. *Sleep Med*. 2021;84:205-18.
- 28 33. Mazzotti DR, Keenan BT, Thorarinsdottir EH, Gislason T, Pack AI, Sleep Apnea Global
- 29 Interdisciplinary C. Is the Epworth Sleepiness Scale Sufficient to Identify the Excessively Sleepy
- 30 Subtype of OSA? *Chest*. 2022;161(2):557-61.
- 31 34. Thorarinsdottir EH, Bjornsdottir E, Benediktsdottir B, Janson C, Gislason T, Aspelund T, et al.
- 32 Definition of excessive daytime sleepiness in the general population: Feeling sleepy relates better to
- 33 sleep-related symptoms and quality of life than the Epworth Sleepiness Scale score. Results from an
- 34 epidemiological study. *J Sleep Res*. 2019;28(6):e12852.
- 35 35. Mellow ML, Crozier AJ, Dumuid D, Wade AT, Goldsworthy MR, Dorrian J, et al. How are
- 36 combinations of physical activity, sedentary behaviour and sleep related to cognitive function in
- 37 older adults? A systematic review. *Exp Gerontol*. 2022;159:111698.
- 38
- 39
- 40
- 41
- 42
- 43
- 44
- 45
- 46
- 47
- 48
- 49
- 50
- 51
- 52
- 53
- 54
- 55
- 56
- 57
- 58
- 59
- 60

**Table 1.** Characteristics and general health of the participants by the level of physical activity

|                                    | Persistently non-active | Became inactive | Became active | Persistently active | p-value          |
|------------------------------------|-------------------------|-----------------|---------------|---------------------|------------------|
| <b>General characteristics</b>     |                         |                 |               |                     |                  |
| N, %                               | 1601 (36.9)             | 881 (20.3)      | 775 (17.9)    | 1082 (24.9)         |                  |
| Men, %                             | 44.3                    | 49.0            | 46.8          | 53.7                | <b>&lt;0.001</b> |
| Age, years                         | 55.0 ± 7.2              | 54.5 ± 7.1      | 53.4 ± 7.2    | 53.7 ± 7.2          | <b>&lt;0.001</b> |
| Body mass index, kg/m <sup>2</sup> | 27.6 ± 5.2              | 27.1 ± 4.9      | 27.1 ± 4.8    | 27.0 ± 4.4          | <b>0.007</b>     |
| Currently working, %               | 82.7                    | 85.8            | 88.9          | 90.4                | <b>&lt;0.001</b> |
| <b>Smoking history</b>             |                         |                 |               |                     |                  |
| Never, %                           | 42.4                    | 43.4            | 44.3          | 47.6                | <b>&lt;0.001</b> |
| Former, %                          | 34.4                    | 39.8            | 37.5          | 40.0                |                  |
| Current, %                         | 23.2                    | 16.9            | 18.2          | 12.4                |                  |

**Table 2.** Insomnia symptoms, sleep duration and daytime sleepiness by level of physical activity.

|                                                                                                                                                                                                                                            | <b>Persistently non-active</b><br>(n=1601) | <b>Became inactive</b><br>(n=881) | <b>Became active</b><br>(n=775) | <b>Persistently Active</b><br>(n=1082) | p-value          |
|--------------------------------------------------------------------------------------------------------------------------------------------------------------------------------------------------------------------------------------------|--------------------------------------------|-----------------------------------|---------------------------------|----------------------------------------|------------------|
| <b>Insomnia symptoms</b>                                                                                                                                                                                                                   |                                            |                                   |                                 |                                        |                  |
| Difficulties initiating sleep (%)                                                                                                                                                                                                          | 15.4                                       | 14.0                              | 11.7                            | 8.2                                    | <b>&lt;0.001</b> |
| Difficulties maintaining sleep (%)                                                                                                                                                                                                         | 31.9                                       | 32.1                              | 33.0                            | 28.5                                   | 0.128            |
| Early morning awakenings (%)                                                                                                                                                                                                               | 18.2                                       | 18.3                              | 15.0                            | 13.2                                   | <b>0.002</b>     |
| Any insomnia symptom (%)                                                                                                                                                                                                                   | 41.0                                       | 41.5                              | 39.5                            | 34.9                                   | <b>0.006</b>     |
| Numbers of insomnia symptoms                                                                                                                                                                                                               |                                            |                                   |                                 |                                        |                  |
| None (%)                                                                                                                                                                                                                                   | 58.4                                       | 58.2                              | 61.0                            | 64.9                                   | <b>0.001</b>     |
| One (%)                                                                                                                                                                                                                                    | 23.2                                       | 25.2                              | 24.0                            | 23.8                                   |                  |
| Two (%)                                                                                                                                                                                                                                    | 11.9                                       | 10.6                              | 10.0                            | 7.8                                    |                  |
| Three (%)                                                                                                                                                                                                                                  | 6.6                                        | 6.1                               | 5.1                             | 3.6                                    |                  |
| <b>Sleep duration</b>                                                                                                                                                                                                                      |                                            |                                   |                                 |                                        |                  |
| Sleep time (hours)                                                                                                                                                                                                                         | 6.8 ± 1.1                                  | 6.8 ± 1.0                         | 6.9 ± 1.0                       | 6.9 ± 0.9                              | 0.234            |
| Sleep time, %                                                                                                                                                                                                                              |                                            |                                   |                                 |                                        |                  |
| Short sleepers (≤ 6 hours)                                                                                                                                                                                                                 | 35.9                                       | 31.9                              | 20.7                            | 26.9                                   | <b>&lt;0.001</b> |
| Normal sleepers (6 – 9 hours)                                                                                                                                                                                                              | 59.2                                       | 64.6                              | 66.9                            | 70.9                                   |                  |
| Long sleepers (≥ 9 hours)                                                                                                                                                                                                                  | 4.9                                        | 3.5                               | 3.4                             | 2.2                                    |                  |
| <b>Daytime sleepiness</b>                                                                                                                                                                                                                  |                                            |                                   |                                 |                                        |                  |
| Epworth sleepiness scale score                                                                                                                                                                                                             | 6.8 ± 4.1                                  | 7.2 ± 4.1                         | 6.9 ± 4.1                       | 6.9 ± 3.8                              | 0.106            |
| Epworth sleepiness scale score >10 (%)                                                                                                                                                                                                     | 17.2                                       | 19.4                              | 17.7                            | 15.6                                   | 0.176            |
| Data are presented as mean ± standard deviation or % where indicated. Significant differences are in bold (p<0.05). *p-value from Pearson's chi-square test (numerical variables) and one-way analysis of variance (continuous variables). |                                            |                                   |                                 |                                        |                  |

**Table 3.** Independent association between the level of physical activity and medical disorders, insomnia symptoms, daytime sleepiness and sleep duration expressed as adjusted\* odds ratios (95% CI) with the persistently non-active group as reference. Bold text indicates statistical significance.

|                                                                                               | <b>Became inactive</b><br>(n=881) | <b>Became active</b><br>(n=775) | <b>Persistently active</b><br>(n=1082) |
|-----------------------------------------------------------------------------------------------|-----------------------------------|---------------------------------|----------------------------------------|
| <b>Insomnia symptoms</b>                                                                      |                                   |                                 |                                        |
| Difficulties initiating sleep                                                                 | 0.97 (0.75-1.25)                  | 0.82 (0.62-1.08)                | <b>0.58 (0.42-0.77)</b>                |
| Difficulties maintaining sleep                                                                | 0.96 (0.80-1.17)                  | 1.04 (0.85-1.27)                | <b>0.80 (0.66-0.97)</b>                |
| Early morning awakenings                                                                      | 1.09 (0.87-1.38)                  | 0.86 (0.63-1.03)                | 0.80 (0.63-1.03)                       |
| Any insomnia symptom                                                                          | 1.02 (0.85-1.22)                  | 0.95 (0.78-1.14)                | <b>0.78 (0.65-0.94)</b>                |
| Numbers of insomnia symptoms                                                                  |                                   |                                 |                                        |
| One                                                                                           | 1.07 (0.86-1.32)                  | 0.99 (0.79-1.24)                | 0.91 (0.74-1.12)                       |
| Two                                                                                           | 0.89 (0.66-1.20)                  | 0.86 (0.63-1.17)                | <b>0.60 (0.43-0.82)</b>                |
| Three                                                                                         | 1.09 (0.74-1.59)                  | 0.94 (0.62-1.42)                | <b>0.63 (0.41-0.98)</b>                |
| <b>Daytime sleepiness</b>                                                                     |                                   |                                 |                                        |
| Epworth sleepiness scale score >10                                                            | 1.17 (0.94-1.47)                  | 1.00 (0.78-1.27)                | 0.87 (0.69-1.10)                       |
| <b>Sleep duration</b>                                                                         |                                   |                                 |                                        |
| Short sleepers ( $\leq$ 6 hours)                                                              | 0.89 (0.73-10.7)                  | 0.85 (0.69-1.03)                | <b>0.71 (0.58-0.85)</b>                |
| Normal sleepers (6-9 hours)                                                                   | 1.18 (0.98-1.42)                  | <b>1.21 (1.00-1.47)</b>         | <b>1.55 (1.29-1.87)</b>                |
| Long sleepers ( $\geq$ 9 hours)                                                               | 0.74 (0.47-1.17)                  | 0.84 (0.53-1.33)                | <b>0.48 (0.28-0.80)</b>                |
| *Adjusted for age, sex, BMI, smoking history and center. Significant differences are in bold. |                                   |                                 |                                        |

**Table 4.** Associations between age, sex, BMI and smoking history and sleep related symptoms.

|                                    | Age                     | Sex                     | BMI                     | Smoking history         |
|------------------------------------|-------------------------|-------------------------|-------------------------|-------------------------|
| <b>Insomnia symptoms</b>           |                         |                         |                         |                         |
| Difficulties initiating sleep      | <b>1.02 (1.01-1.03)</b> | <b>2.16 (1.77-2.64)</b> | <b>1.02 (1.01-1.05)</b> | <b>0.81 (0.66-0.99)</b> |
| Difficulties maintaining sleep     | <b>1.04 (1.03-1.05)</b> | <b>1.80 (1.56-2.07)</b> | <b>1.01 (1.00-1.03)</b> | 1.09 (0.95-1.26)        |
| Early morning awakenings           | <b>1.02 (1.01-1.03)</b> | <b>1.52 (1.28-1.80)</b> | 1.01 (1.00-1.03)        | 1.02 (0.85-1.21)        |
| Any insomnia symptom               | <b>1.03 (1.02-1.04)</b> | <b>1.75 (1.53-1.99)</b> | <b>1.02 (1.01-1.03)</b> | 1.07 (0.93-1.22)        |
| Numbers of insomnia symptoms       |                         |                         |                         |                         |
| One                                | <b>1.03 (1.01-1.04)</b> | <b>1.47 (1.26-1.71)</b> | <b>1.02 (1.00-1.03)</b> | 1.15 (0.98-1.34)        |
| Two                                | <b>1.04 (1.02-1.06)</b> | <b>2.11 (1.69-2.64)</b> | <b>1.02 (1.00-1.05)</b> | 1.01 (0.80-1.26)        |
| Three                              | <b>1.04 (1.02-1.06)</b> | <b>2.62 (1.93-3.53)</b> | 1.03 (0.99-1.06)        | 0.89 (0.66-1.20)        |
| <b>Daytime sleepiness</b>          |                         |                         |                         |                         |
| Epworth sleepiness scale score >10 | 0.99 (0.98-1.00)        | 0.95 (0.81-1.12)        | 1.01 (0.99-1.03)        | <b>1.28 (1.08-1.52)</b> |
| <b>Sleep duration</b>              |                         |                         |                         |                         |
| Short sleepers ( $\leq 6$ hours)   | 1.01 (0.99-1.02)        | 0.88 (0.77-1.00)        | <b>1.03 (1.02-1.05)</b> | <b>0.83 (0.72-0.96)</b> |
| Normal sleepers (6-9 hours)        | <b>0.99 (0.98-0.99)</b> | 1.08 (0.95-1.23)        | <b>0.96 (0.95-0.98)</b> | <b>1.20 (1.05-1.38)</b> |
| Long sleepers ( $\geq 9$ hours)    | <b>1.03 (1.01-1.06)</b> | 1.35 (0.96-1.89)        | 1.02 (0.99-1.06)        | 0.95 (0.67-1.34)        |



1  
2  
3 **Figure legends:**

4  
5 **Figure 1.** Flow chart of the study population in the European community health  
6 survey (ECRSH)

7  
8 **Figure 2.** Prevalence of any insomnia symptom, short sleep duration ( $\leq 6$  hours per  
9 night), long sleep duration ( $\geq 9$  hours per night) and daytime sleepiness (ESS $>10$ ) by  
10 country  
11

12  
13 **Figure 3.** Activity levels by country  
14  
15  
16  
17  
18  
19  
20  
21  
22  
23  
24  
25  
26  
27  
28  
29  
30  
31  
32  
33  
34  
35  
36  
37  
38  
39  
40  
41  
42  
43  
44  
45  
46  
47  
48  
49  
50  
51  
52  
53  
54  
55  
56  
57  
58  
59  
60

For peer review only

1  
2  
3  
4  
5  
6  
7  
8  
9  
10  
11  
12  
13  
14  
15  
16  
17  
18  
19  
20  
21  
22  
23  
24  
25  
26  
27  
28  
29  
30  
31  
32  
33  
34  
35  
36  
37  
38  
39  
40  
41  
42  
43  
44  
45  
46  
47  
48  
49  
50  
51  
52  
53  
54  
55  
56  
57  
58  
59  
60

For peer review only

**Figure 1.** Flow chart of the study population in the European community health survey (ECRSH)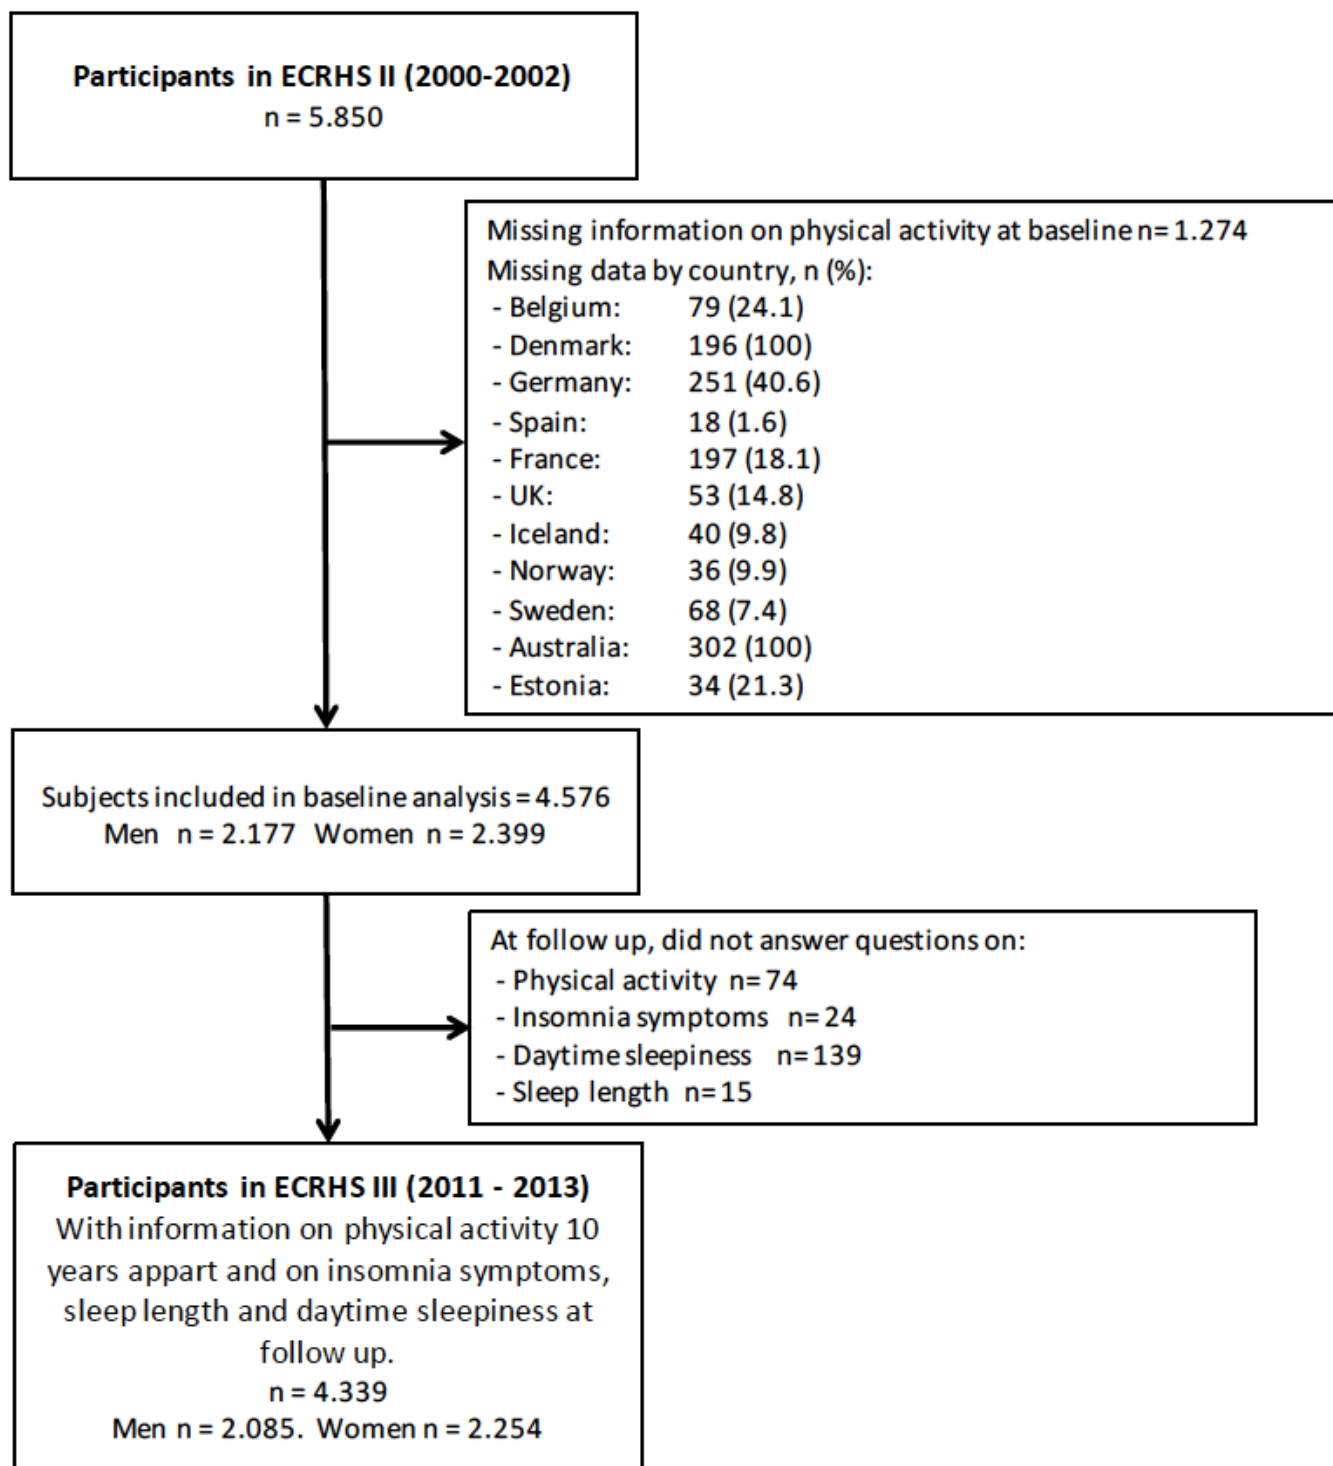

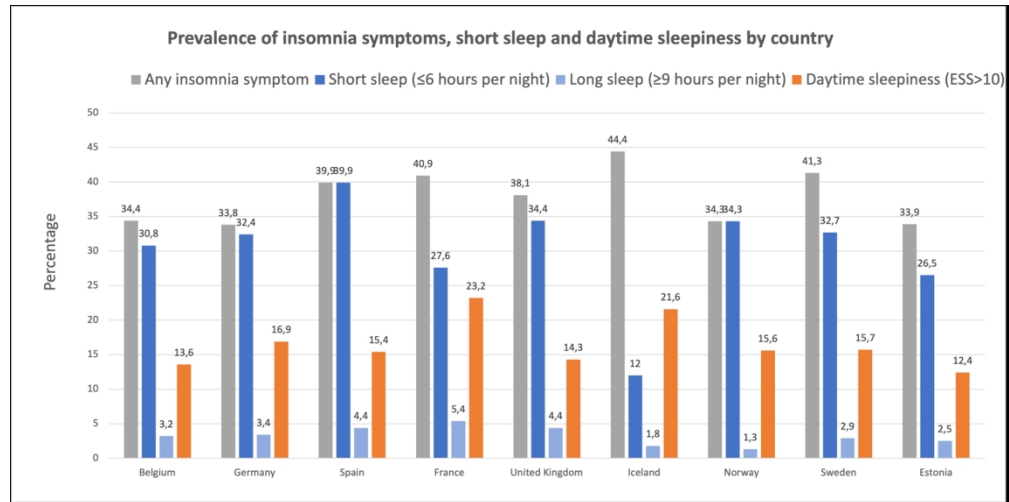

Figure 2. Prevalence of any insomnia symptom, short sleep duration ( $\leq 6$  hours per night), long sleep duration ( $\geq 9$  hours per night) and daytime sleepiness (ESS $>10$ ) by country

229x115mm (220 x 220 DPI)

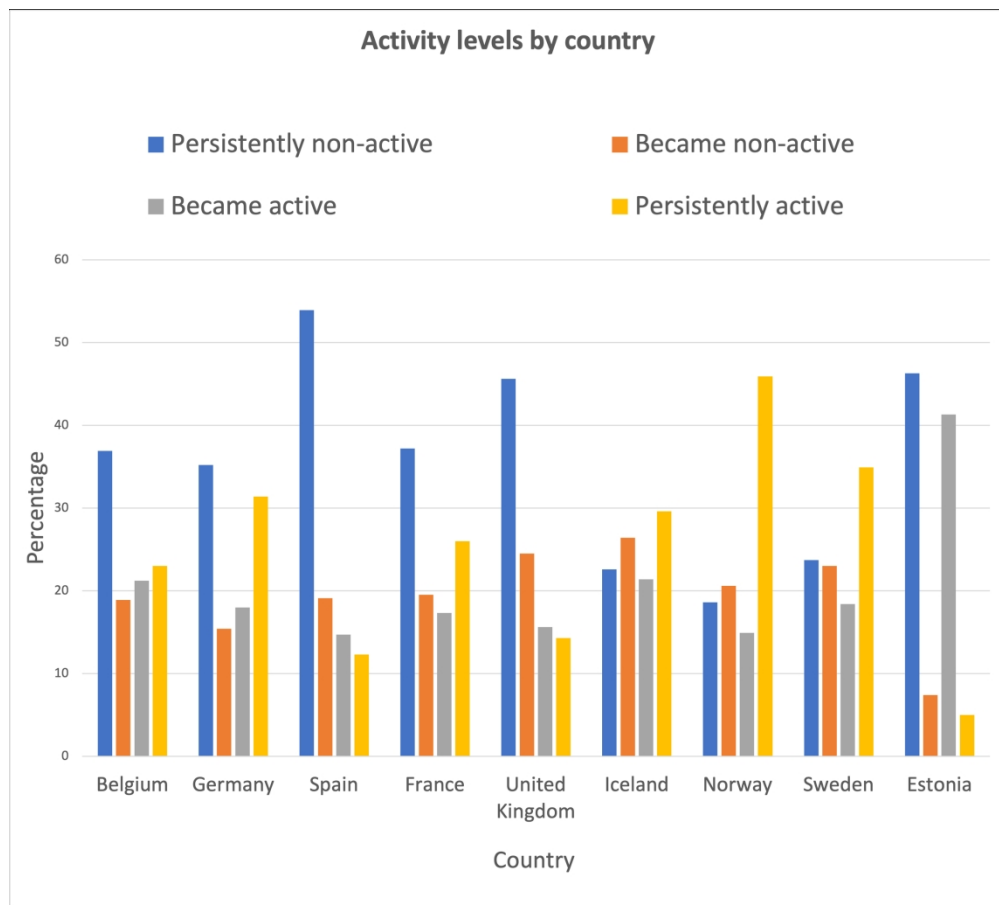

Figure 3. Activity levels by country

224x202mm (300 x 300 DPI)

## STROBE Statement—checklist of items that should be included in reports of observational studies

|                              | Item No | Recommendation                                                                                                                                                                                                                                                                                                                                                                                                                                                         | Page No  |
|------------------------------|---------|------------------------------------------------------------------------------------------------------------------------------------------------------------------------------------------------------------------------------------------------------------------------------------------------------------------------------------------------------------------------------------------------------------------------------------------------------------------------|----------|
| <b>Title and abstract</b>    | 1       | (a) Indicate the study's design with a commonly used term in the title or the abstract                                                                                                                                                                                                                                                                                                                                                                                 | 1        |
|                              |         | (b) Provide in the abstract an informative and balanced summary of what was done and what was found                                                                                                                                                                                                                                                                                                                                                                    | 3        |
| <b>Introduction</b>          |         |                                                                                                                                                                                                                                                                                                                                                                                                                                                                        |          |
| Background/rationale         | 2       | Explain the scientific background and rationale for the investigation being reported                                                                                                                                                                                                                                                                                                                                                                                   | 5        |
| Objectives                   | 3       | State specific objectives, including any prespecified hypotheses                                                                                                                                                                                                                                                                                                                                                                                                       | 5-6      |
| <b>Methods</b>               |         |                                                                                                                                                                                                                                                                                                                                                                                                                                                                        |          |
| Study design                 | 4       | Present key elements of study design early in the paper                                                                                                                                                                                                                                                                                                                                                                                                                | 6        |
| Setting                      | 5       | Describe the setting, locations, and relevant dates, including periods of recruitment, exposure, follow-up, and data collection                                                                                                                                                                                                                                                                                                                                        | 6-8      |
| Participants                 | 6       | (a) <i>Cohort study</i> —Give the eligibility criteria, and the sources and methods of selection of participants. Describe methods of follow-up<br><i>Case-control study</i> —Give the eligibility criteria, and the sources and methods of case ascertainment and control selection. Give the rationale for the choice of cases and controls<br><i>Cross-sectional study</i> —Give the eligibility criteria, and the sources and methods of selection of participants | 6        |
|                              |         | (b) <i>Cohort study</i> —For matched studies, give matching criteria and number of exposed and unexposed<br><i>Case-control study</i> —For matched studies, give matching criteria and the number of controls per case                                                                                                                                                                                                                                                 | N/A      |
| Variables                    | 7       | Clearly define all outcomes, exposures, predictors, potential confounders, and effect modifiers. Give diagnostic criteria, if applicable                                                                                                                                                                                                                                                                                                                               | 6-8      |
| Data sources/<br>measurement | 8*      | For each variable of interest, give sources of data and details of methods of assessment (measurement). Describe comparability of assessment methods if there is more than one group                                                                                                                                                                                                                                                                                   | 6-8      |
| Bias                         | 9       | Describe any efforts to address potential sources of bias                                                                                                                                                                                                                                                                                                                                                                                                              | 4, 12    |
| Study size                   | 10      | Explain how the study size was arrived at                                                                                                                                                                                                                                                                                                                                                                                                                              | 8, fig 1 |
| Quantitative variables       | 11      | Explain how quantitative variables were handled in the analyses. If applicable, describe which groupings were chosen and why                                                                                                                                                                                                                                                                                                                                           | 7-8      |
| Statistical methods          | 12      | (a) Describe all statistical methods, including those used to control for confounding                                                                                                                                                                                                                                                                                                                                                                                  | 7-8      |
|                              |         | (b) Describe any methods used to examine subgroups and interactions                                                                                                                                                                                                                                                                                                                                                                                                    | 7-8      |
|                              |         | (c) Explain how missing data were addressed                                                                                                                                                                                                                                                                                                                                                                                                                            | 8, fig 1 |
|                              |         | (d) <i>Cohort study</i> —If applicable, explain how loss to follow-up was addressed<br><i>Case-control study</i> —If applicable, explain how matching of cases and controls was addressed<br><i>Cross-sectional study</i> —If applicable, describe analytical methods taking account of sampling strategy                                                                                                                                                              | 8, fig 1 |

1  
2  
3  
4  
5  
6  
7  
8  
9  
10  
11  
12  
13  
14  
15  
16  
17  
18  
19  
20  
21  
22  
23  
24  
25  
26  
27  
28  
29  
30  
31  
32  
33  
34  
35  
36  
37  
38  
39  
40  
41  
42  
43  
44  
45  
46  
47  
48  
49  
50  
51  
52  
53  
54  
55  
56  
57  
58  
59  
60

(e) Describe any sensitivity analyses

Continued on next page



For peer review only

1  
2  
3  
4  
5  
6  
7  
8  
9  
10  
11  
12  
13  
14  
15  
16  
17  
18  
19  
20  
21  
22  
23  
24  
25  
26  
27  
28  
29  
30  
31  
32  
33  
34  
35  
36  
37  
38  
39  
40  
41  
42  
43  
44  
45  
46  
47  
48  
49  
50  
51  
52  
53  
54  
55  
56  
57  
58  
59  
60**Results**

|                  |     |                                                                                                                                                                                                              |                            |
|------------------|-----|--------------------------------------------------------------------------------------------------------------------------------------------------------------------------------------------------------------|----------------------------|
| Participants     | 13* | (a) Report numbers of individuals at each stage of study—eg numbers potentially eligible, examined for eligibility, confirmed eligible, included in the study, completing follow-up, and analysed            | 8, fig 1                   |
|                  |     | (b) Give reasons for non-participation at each stage                                                                                                                                                         | 8, fig 1                   |
|                  |     | (c) Consider use of a flow diagram                                                                                                                                                                           | Fig 1                      |
| Descriptive data | 14* | (a) Give characteristics of study participants (eg demographic, clinical, social) and information on exposures and potential confounders                                                                     | 8                          |
|                  |     | (b) Indicate number of participants with missing data for each variable of interest                                                                                                                          | Table 1                    |
|                  |     | (c) <i>Cohort study</i> —Summarise follow-up time (eg, average and total amount)                                                                                                                             | 6                          |
| Outcome data     | 15* | <i>Cohort study</i> —Report numbers of outcome events or summary measures over time                                                                                                                          | 8-9                        |
|                  |     | <i>Case-control study</i> —Report numbers in each exposure category, or summary measures of exposure                                                                                                         | N/A                        |
|                  |     | <i>Cross-sectional study</i> —Report numbers of outcome events or summary measures                                                                                                                           | N/A                        |
| Main results     | 16  | (a) Give unadjusted estimates and, if applicable, confounder-adjusted estimates and their precision (eg, 95% confidence interval). Make clear which confounders were adjusted for and why they were included | Table 1, 2, 3 and page 8-9 |
|                  |     | (b) Report category boundaries when continuous variables were categorized                                                                                                                                    | See tables and methods     |
|                  |     | (c) If relevant, consider translating estimates of relative risk into absolute risk for a meaningful time period                                                                                             | x                          |
| Other analyses   | 17  | Report other analyses done—eg analyses of subgroups and interactions, and sensitivity analyses                                                                                                               | N/A                        |

**Discussion**

|                  |    |                                                                                                                                                                            |        |
|------------------|----|----------------------------------------------------------------------------------------------------------------------------------------------------------------------------|--------|
| Key results      | 18 | Summarise key results with reference to study objectives                                                                                                                   | 10     |
| Limitations      | 19 | Discuss limitations of the study, taking into account sources of potential bias or imprecision. Discuss both direction and magnitude of any potential bias                 | 4, 12  |
| Interpretation   | 20 | Give a cautious overall interpretation of results considering objectives, limitations, multiplicity of analyses, results from similar studies, and other relevant evidence | 10-12  |
| Generalisability | 21 | Discuss the generalisability (external validity) of the study results                                                                                                      | 10, 12 |

**Other information**

|         |    |                                                                                                                                                               |   |
|---------|----|---------------------------------------------------------------------------------------------------------------------------------------------------------------|---|
| Funding | 22 | Give the source of funding and the role of the funders for the present study and, if applicable, for the original study on which the present article is based | 2 |
|---------|----|---------------------------------------------------------------------------------------------------------------------------------------------------------------|---|

\*Give information separately for cases and controls in case-control studies and, if applicable, for exposed and unexposed groups in cohort and cross-sectional studies.

**Note:** An Explanation and Elaboration article discusses each checklist item and gives methodological background and published examples of transparent reporting. The STROBE checklist is best used in conjunction with this article (freely available on the Web sites of PLoS Medicine at <http://www.plosmedicine.org/>, Annals of Internal Medicine at <http://www.annals.org/>, and Epidemiology at <http://www.epidem.com/>). Information on the STROBE Initiative is available at [www.strobe-statement.org](http://www.strobe-statement.org).
